# Supplementary material
Source: PubMed Central journal article supplement (PMC3879620)

Protein references (1):

- Laminin subunit beta-4 OS=Homo sapiens GN=LAMB4 PE=2 SV=1 - [LAMB4\_HUMAN]

Peptide Summary  
 Sequence: KIQDLNLSRQAK, Charge: +2, Monoisotopic m/z: 707.91999 Da (+508.07 mmu/+717.69 ppm), MH+: 1414.83271 Da, RT: 49.16 min,  
 Identified with: Mascot (v1.30); IonScore:52, Exp Value:1.5E-003, Ions matched by search engine: 9/118  
 Fragment match tolerance used for search: 0.5 Da  
 Fragments used for search: b; b-H<sub>2</sub>O; b-NH<sub>3</sub>; y; y-H<sub>2</sub>O; y-NH<sub>3</sub>

Fragment Matches

Value Type:

Ion Series:

| #1 | b <sup>+</sup> | b <sup>+</sup> -H <sub>2</sub> O | Seq. | y <sup>+</sup> | y <sup>+</sup> -NH <sub>3</sub> | #2 |
|----|----------------|----------------------------------|------|----------------|---------------------------------|----|
| 1  | 123.10225      | 65.05476                         | K    |                |                                 | 12 |
| 2  | 242.18632      | 121.59680                        | I    | 1285.72233     | 643.36480                       | 11 |
| 3  | 370.24490      | 185.62609                        | Q    | 1172.63826     | 586.82277                       | 10 |
| 4  | 485.27185      | 243.13956                        | D    | 1044.57968     | 522.79348                       | 9  |
| 5  | 598.35592      | 299.68160                        | L    | 929.55273      | 465.28000                       | 8  |
| 6  | 712.39885      | 356.70306                        | N    | 816.46866      | 408.73797                       | 7  |
| 7  | 825.48292      | 413.24510                        | L    | 702.42573      | 351.71650                       | 6  |
| 8  | 912.51495      | 456.76111                        | S    | 589.34166      | 295.17447                       | 5  |
| 9  | 1068.61607     | 534.81167                        | R    | 502.30963      | 251.65845                       | 4  |
| 10 | 1196.67465     | 598.64096                        | Q    | 346.20851      | 173.60789                       | 3  |
| 11 | 1267.71177     | 634.35952                        | A    | 218.14993      | 109.57860                       | 2  |
| 12 |                |                                  | K    | 147.11281      | 74.06004                        | 1  |

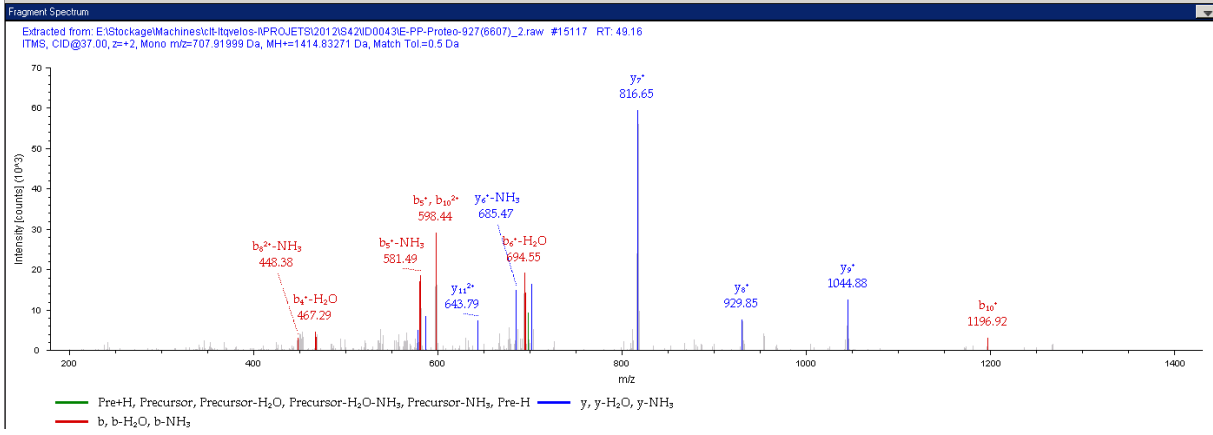

Protein references (1):

- Carnitine O-acetyltransferase OS=Homo sapiens GN=CRAT PE=1 SV=5 - [CACP\_HUMAN]

Peptide Summary

Sequence: QLVDPEFQASGGVGER, Charge: +2, Monoisotopic m/z: 796.31999 Da (-69.27 mmu/-86.99 ppm), MH+: 1591.63271 Da, RT: 46.32 min, Identified with: Mascot (v1.30), IonScore:56, Exp Value:5.3E-004, Ions matched by search engine: 3/160  
 Fragment match tolerance used for search: 0.5 Da  
 Fragments used for search: b, b-H<sub>2</sub>O; b-NH<sub>3</sub>; y, y-H<sub>2</sub>O; y-NH<sub>3</sub>

Fragment Matches

Value Type: Theo. Mass [Da]

| Ion Series | Neutral Losses | Precursor Ions   |      |            |                  |    |
|------------|----------------|------------------|------|------------|------------------|----|
| #1         | b*             | b <sup>+</sup> * | Seq. | y*         | y <sup>+</sup> * | #2 |
| 1          | 129.06586      | 65.03657         | Q    |            |                  | 15 |
| 2          | 242.14993      | 121.57960        | L    | 1463.71258 | 732.35993        | 14 |
| 3          | 341.21835      | 171.11281        | V    | 1350.62851 | 675.81789        | 13 |
| 4          | 456.24530      | 228.62629        | D    | 1251.56009 | 626.28368        | 12 |
| 5          | 595.28790      | 293.14759        | E    | 1136.53214 | 568.77021        | 11 |
| 6          | 732.35632      | 366.68160        | F    | 1007.49054 | 504.24891        | 10 |
| 7          | 860.41490      | 430.71109        | Q    | 860.42212  | 430.71470        | 9  |
| 8          | 931.45202      | 466.22965        | A    | 732.36354  | 366.68541        | 8  |
| 9          | 1018.48405     | 509.74566        | S    | 661.32642  | 331.16685        | 7  |
| 10         | 1075.50952     | 538.25640        | G    | 574.29439  | 287.65083        | 6  |
| 11         | 1132.52699     | 566.76713        | G    | 517.27292  | 259.14010        | 5  |
| 12         | 1231.59541     | 616.30134        | V    | 460.25145  | 230.62936        | 4  |
| 13         | 1288.61688     | 644.81208        | G    | 361.18303  | 181.09515        | 3  |

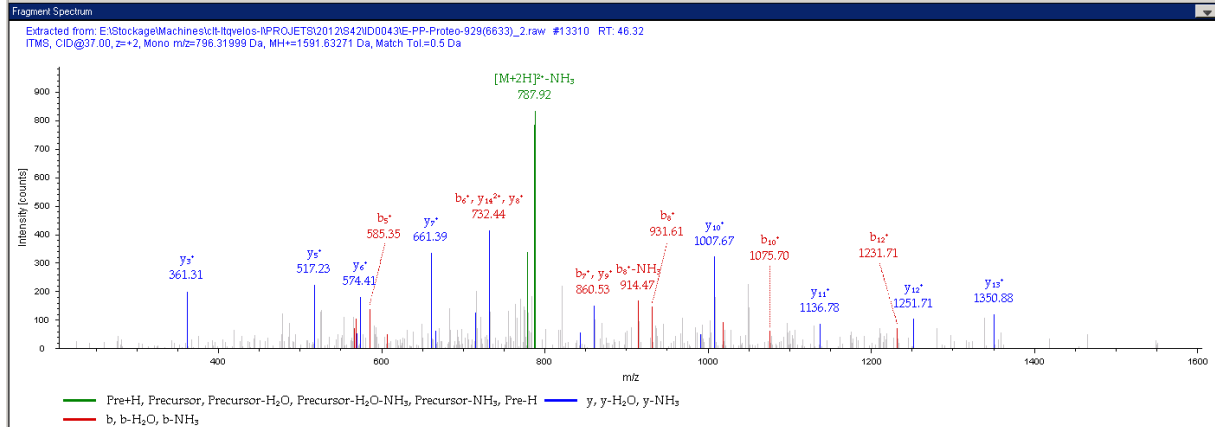

### Protein references (5):

- Histone H3.1 OS=Homo sapiens GN=HIST1H3A PE=1 SV=2 - [H31\_HUMAN]
- Histone H3.1t OS=Homo sapiens GN=HIST3H3 PE=1 SV=3 - [H31T\_HUMAN]

Peptide Summary

Sequence: STELLIR, Charge: +2, Monoisotopic m/z: 416.32169 Da (+71.39 mmu/+171.49 ppm), MH+: 831.63609 Da, RT: 42.33 min, Identified with: Mascot (v1.30); IonScore:59, Exp Value:3.6E-004, Ions matched by search engine: 6/52  
 Fragment match tolerance used for search: 0.5 Da  
 Fragments used for search: b; b-H<sub>2</sub>O; y; y-H<sub>2</sub>O; y-NH<sub>3</sub>

Fragment Matches

Value Type: Theo. Mass [Da]

| #1 | Neutral Losses |                | Seq. | Precursor Ions |                | #2 |
|----|----------------|----------------|------|----------------|----------------|----|
|    | b*             | b <sup>+</sup> |      | y*             | y <sup>+</sup> |    |
| 1  | 88.03931       | 44.52329       | S    |                |                | 7  |
| 2  | 189.08639      | 95.04713       | T    | 744.46145      | 372.73436      | 6  |
| 3  | 318.12959      | 159.56843      | E    | 643.41377      | 322.21052      | 5  |
| 4  | 431.21366      | 216.11047      | L    | 514.37117      | 257.68922      | 4  |
| 5  | 544.25773      | 272.65250      | L    | 401.28710      | 201.14719      | 3  |
| 6  | 657.38180      | 329.19454      | I    | 288.20303      | 144.60515      | 2  |
| 7  |                |                | R    | 175.11896      | 88.06312       | 1  |

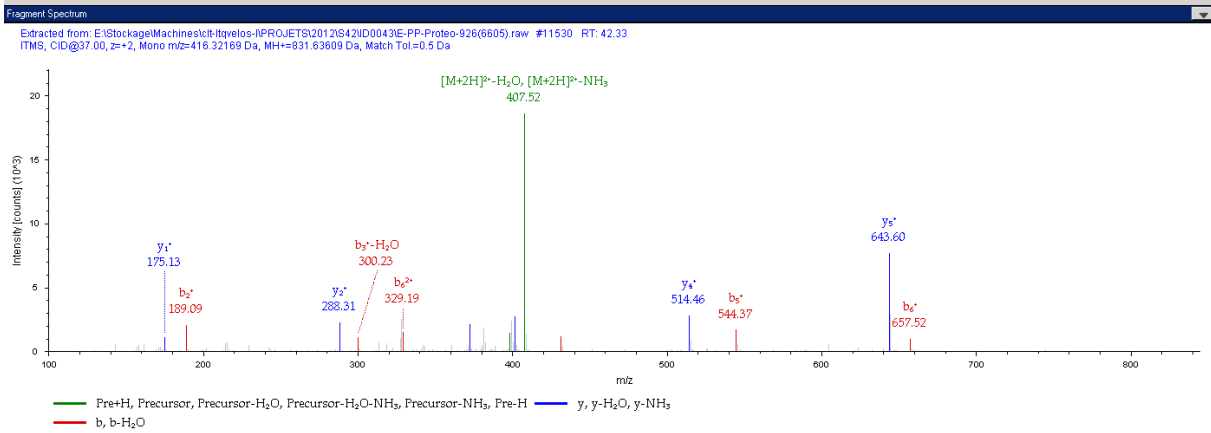

Protein references (1):

- Leukocyte elastase inhibitor OS=Homo sapiens GN=SERPINB1 PE=1 SV=1 - [ILEU\_HUMAN]

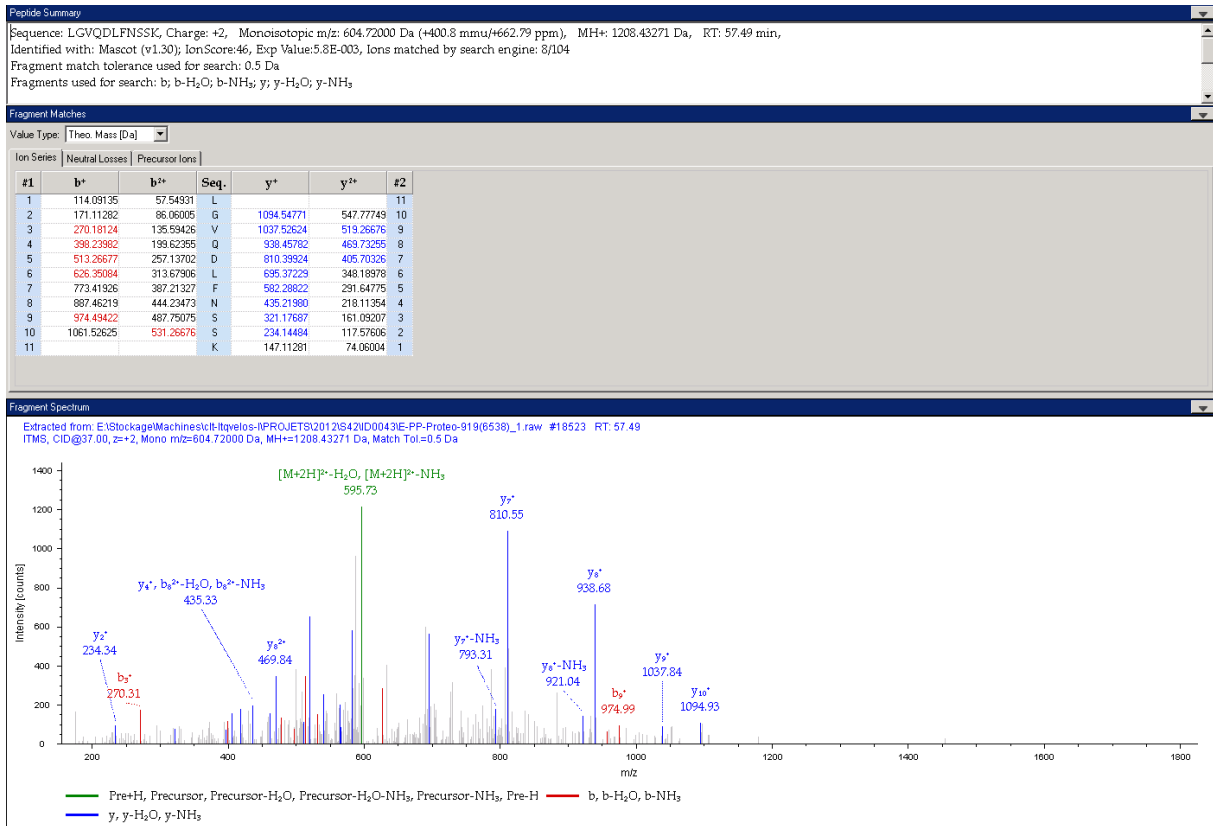

Protein references (1):

- 3-ketoacyl-CoA thiolase, mitochondrial OS=Homo sapiens GN=ACAA2 PE=1 SV=2 - [THIM\_HUMAN]

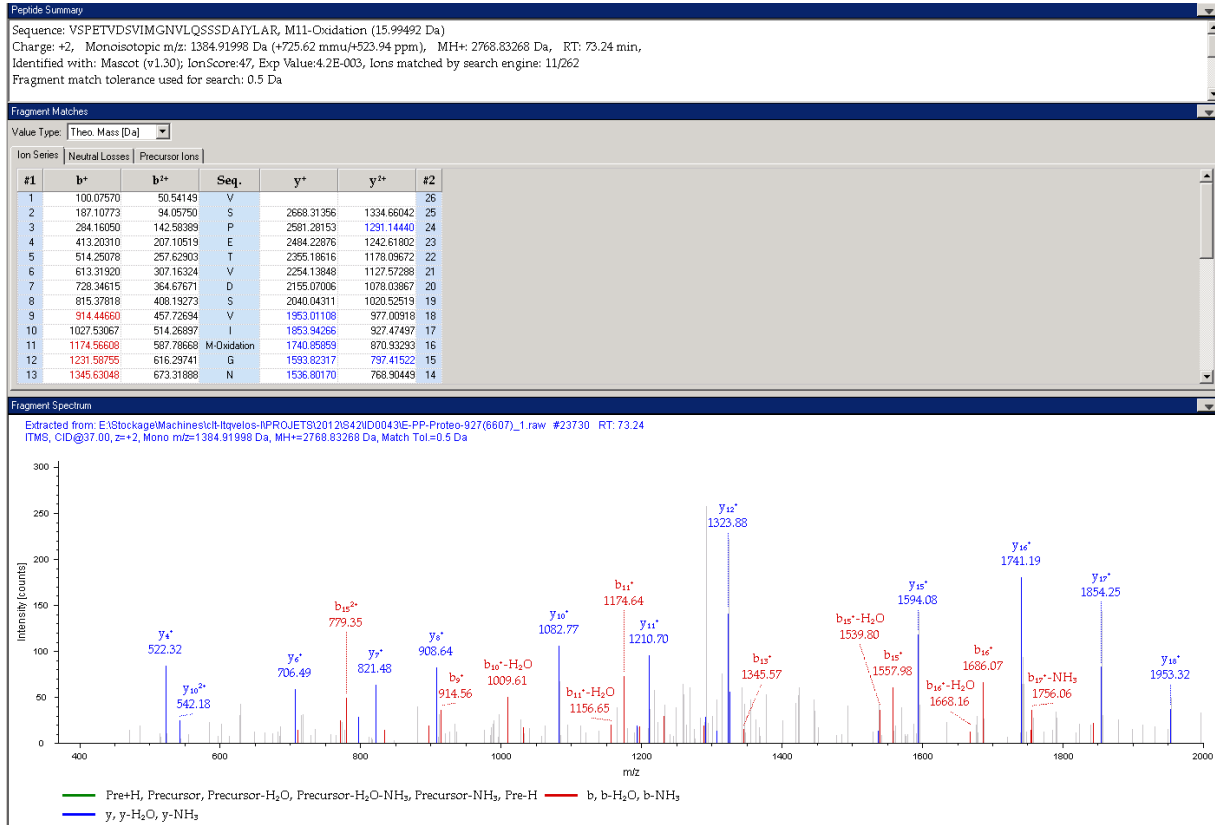

Protein references (1):

- Adenylyl cyclase-associated protein 2 OS=Homo sapiens GN=CAP2 PE=1 SV=1 - [CAP2\_HUMAN]

Peptide Summary

Sequence: SALFAQLNQGEAITK, Charge: +2, Monoisotopic m/z: 795.91999 Da (-7.99 mmu/-10.04 ppm), MH+: 1590.83271 Da, RT: 55.46 min, Identified with: Mascot (v1.30); IonScore:70, Exp Value:2.5E-005, Ions matched by search engine: 8/156, Fragment match tolerance used for search: 0.5 Da, Fragments used for search: b; b-H<sub>2</sub>O; b-NH<sub>3</sub>; y; y-H<sub>2</sub>O; y-NH<sub>3</sub>

Fragment Matches

Value Type: Theo. Mass [Da]

| Ion Series | Neutral Losses | Precursor Ions |      |            |           |    |
|------------|----------------|----------------|------|------------|-----------|----|
| #1         | b*             | b**            | Seq. | y*         | y**       | #2 |
| 1          | 88.0331        | 44.52323       | S    |            |           | 15 |
| 2          | 159.07643      | 80.04185       | A    | 1503.81664 | 752.41196 | 14 |
| 3          | 272.16050      | 136.58389      | L    | 1432.77952 | 716.89340 | 13 |
| 4          | 419.22892      | 210.11810      | F    | 1319.63945 | 660.35136 | 12 |
| 5          | 490.26034      | 245.63661      | A    | 1172.62703 | 586.81715 | 11 |
| 6          | 618.32462      | 309.66595      | Q    | 1101.58991 | 551.29699 | 10 |
| 7          | 731.40869      | 366.20798      | L    | 973.53133  | 487.26930 | 9  |
| 8          | 845.45162      | 423.22945      | N    | 860.44726  | 430.72727 | 8  |
| 9          | 973.51020      | 487.25874      | Q    | 746.40433  | 373.70580 | 7  |
| 10         | 1030.53167     | 515.76947      | G    | 618.34575  | 309.67651 | 6  |
| 11         | 1159.57427     | 580.29077      | E    | 561.32428  | 281.16578 | 5  |
| 12         | 1230.61139     | 615.80933      | A    | 432.28168  | 216.64448 | 4  |
| 13         | 1343.69546     | 672.35137      | I    | 361.24496  | 181.12592 | 3  |

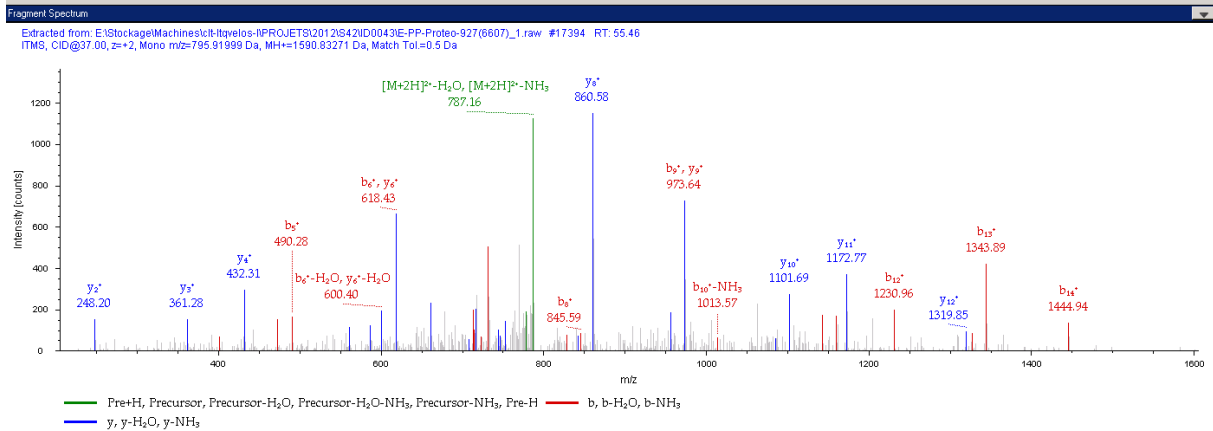

Protein references (1):

- Proteasomal ATPase-associated factor 1 OS=Homo sapiens GN=PAAF1 PE=1 SV=2 - [PAAF1\_HUMAN]

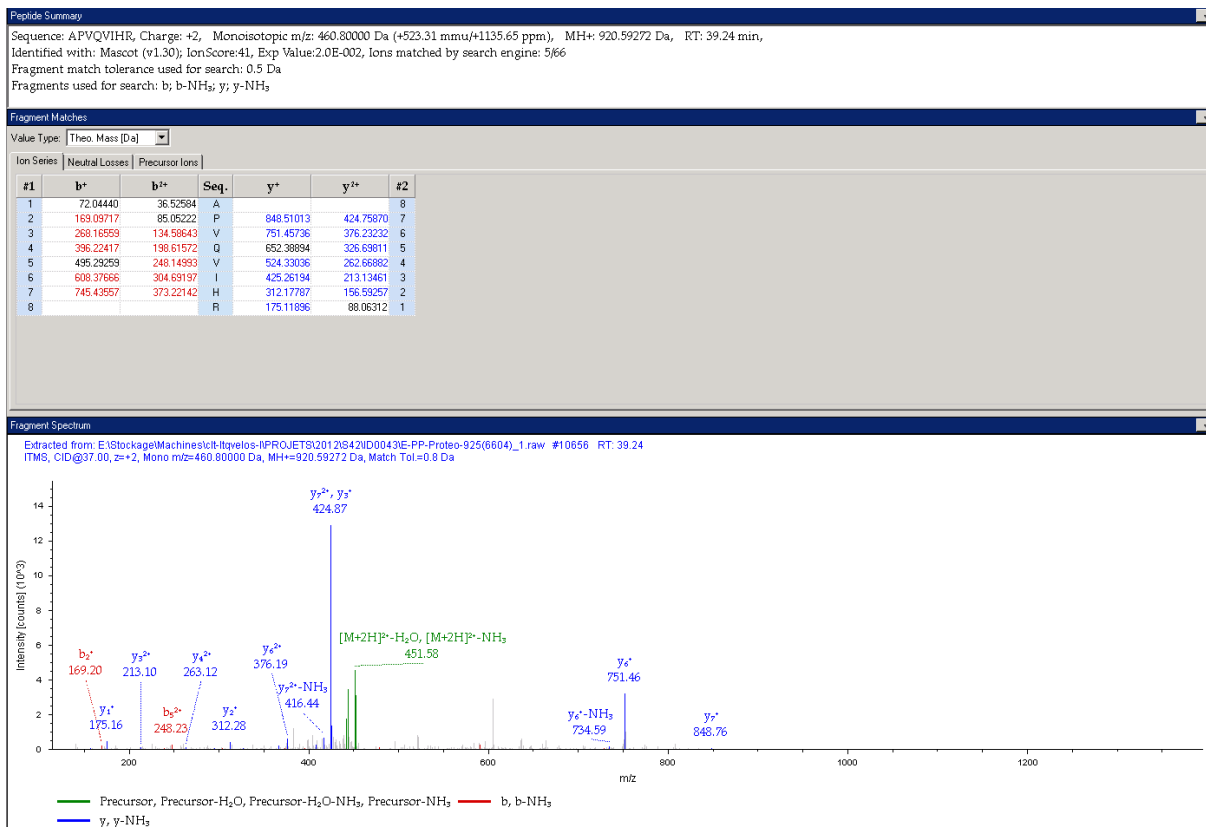

Protein references (1):

- Protein-L-isoaspartate(D-aspartate) O-methyltransferase OS=Homo sapiens GN=PCMT1 PE=1 SV=4 - [PIMT\_HUMAN]

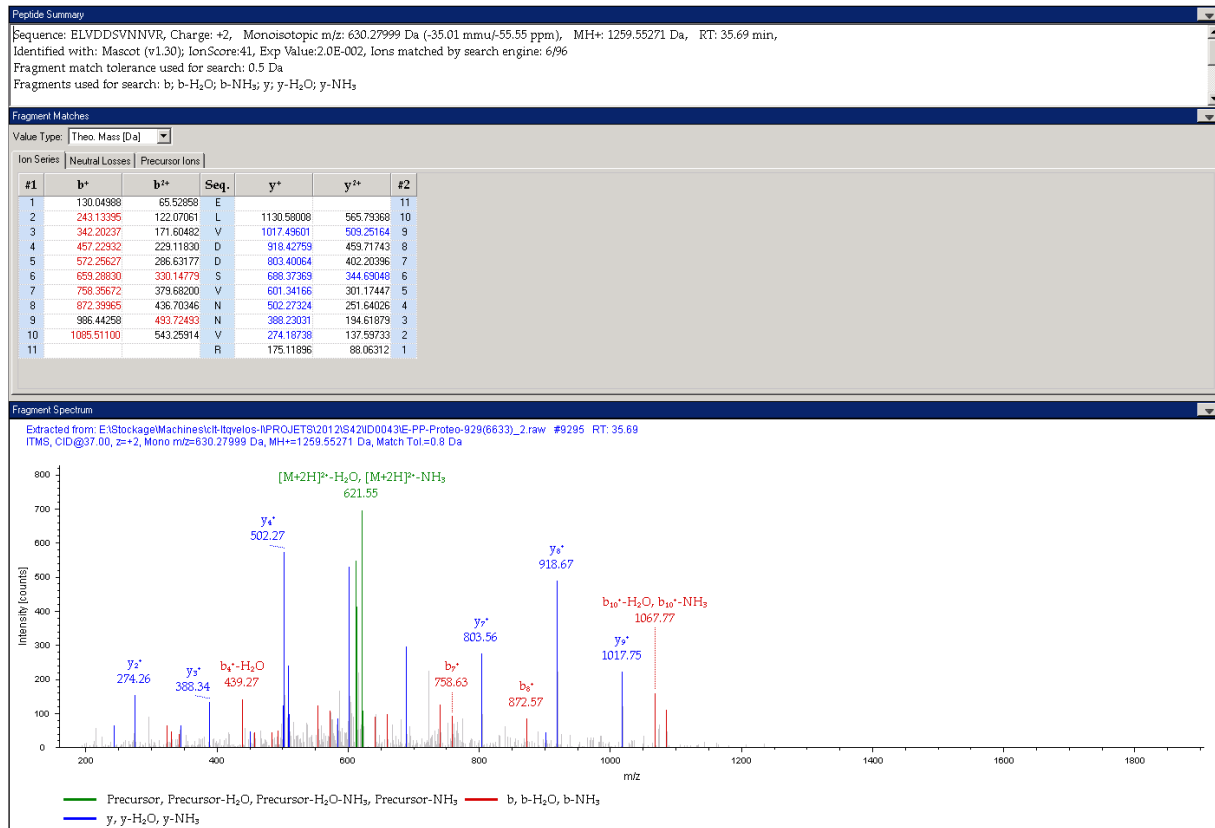



## Protein references (1):

- Heat shock protein beta-7 OS=Homo sapiens GN=HSPB7 PE=1 SV=1 - [HSPB7\_HUMAN]

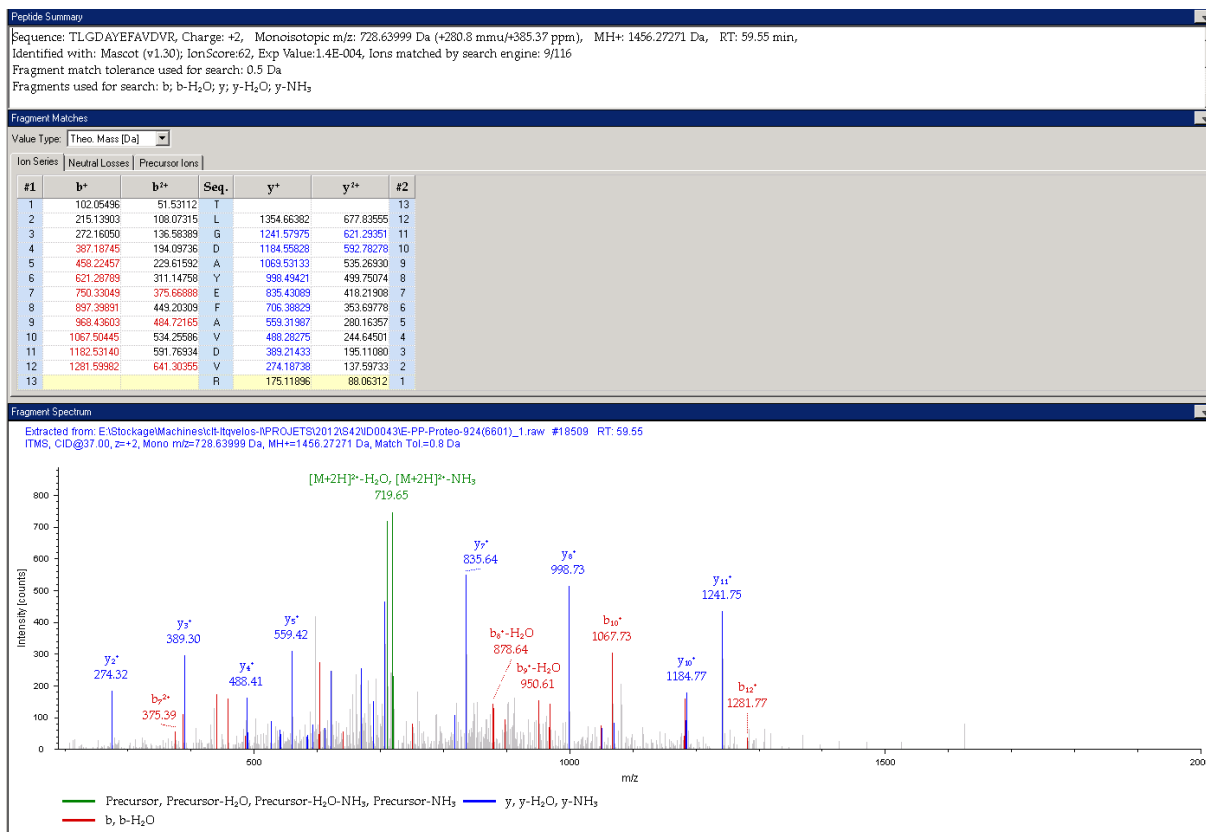

Protein references (1):

- Protein NipSnap homolog 2 OS=Homo sapiens GN=GBAS PE=1 SV=1 - [NIPS2\_HUMAN]

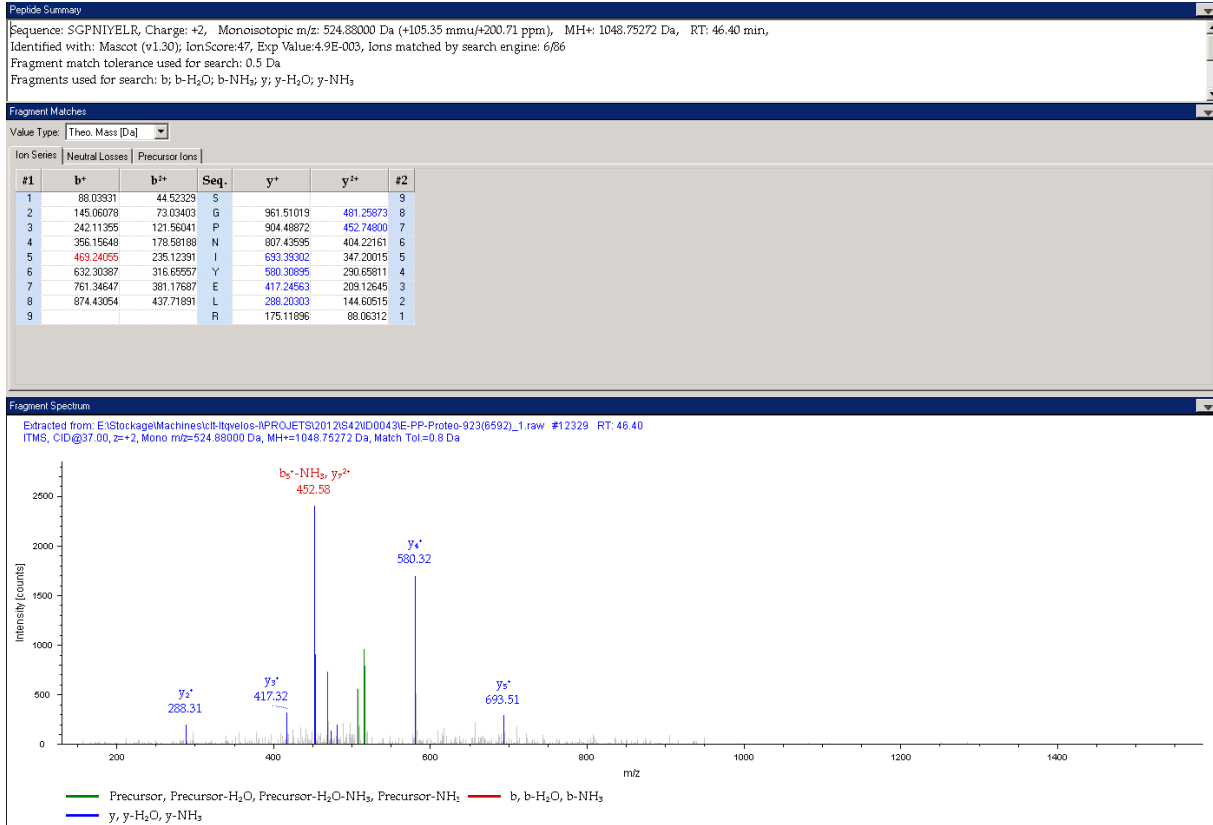

Protein references (1):

- Cytochrome c OS=Homo sapiens GN=CYCS PE=1 SV=2 - [CYC\_HUMAN]

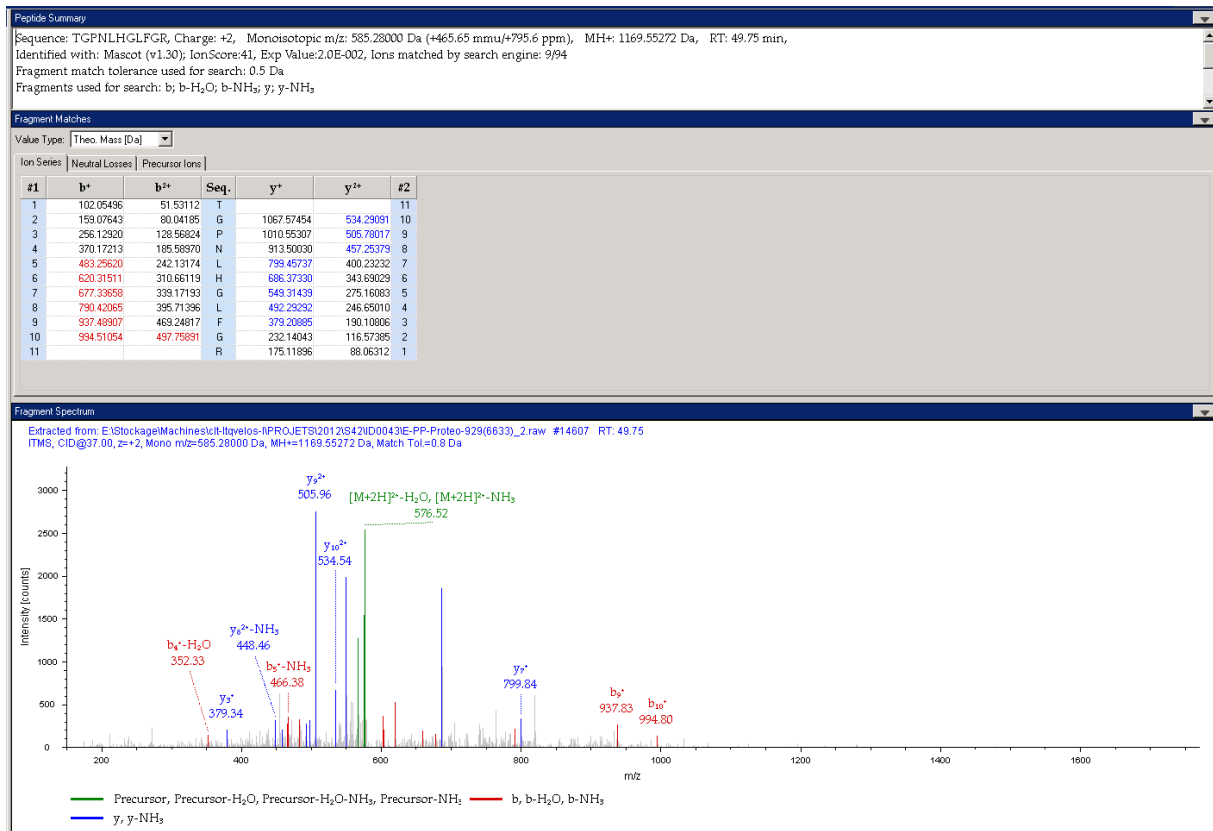

## Protein references (1):

- Transmembrane protein 198 OS=Homo sapiens GN=TMEM198 PE=1 SV=1 - [TM198\_HUMAN]

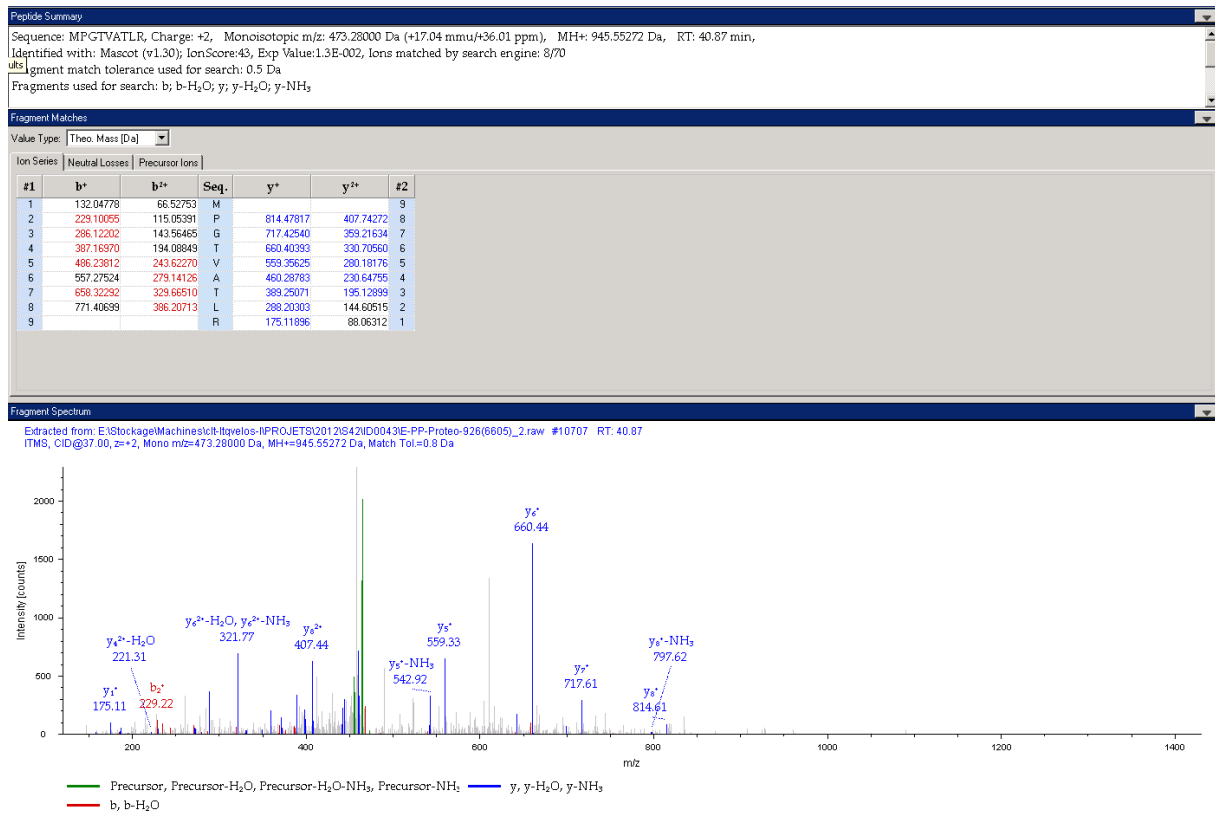

Protein references (1):

- Long-chain-fatty-acid--CoA ligase 1 OS=Homo sapiens GN=ACSL1 PE=1 SV=1 - [ACSL1\_HUMAN]

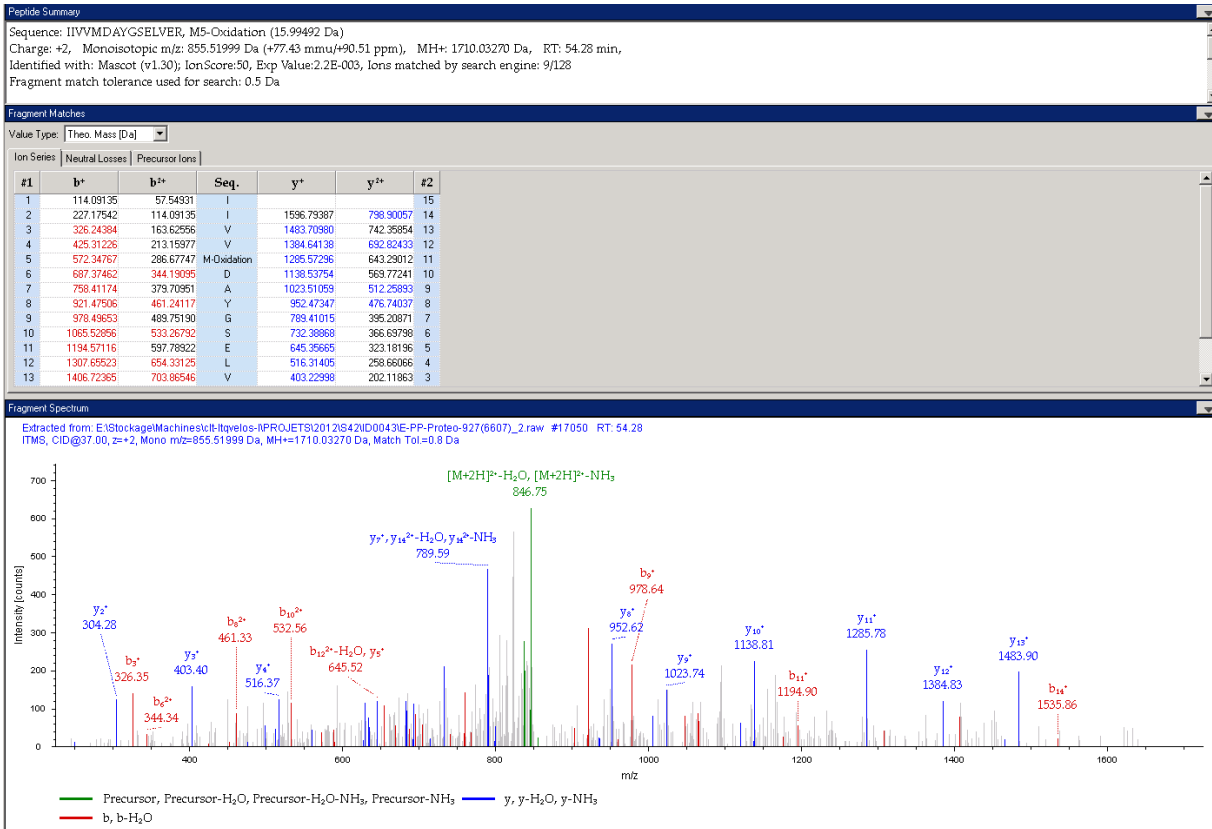

Protein references (1):

- Cytosolic 10-formyltetrahydrofolate dehydrogenase OS=Homo sapiens GN=ALDH1L1 PE=1 SV=2 - [AL1L1\_HUMAN]

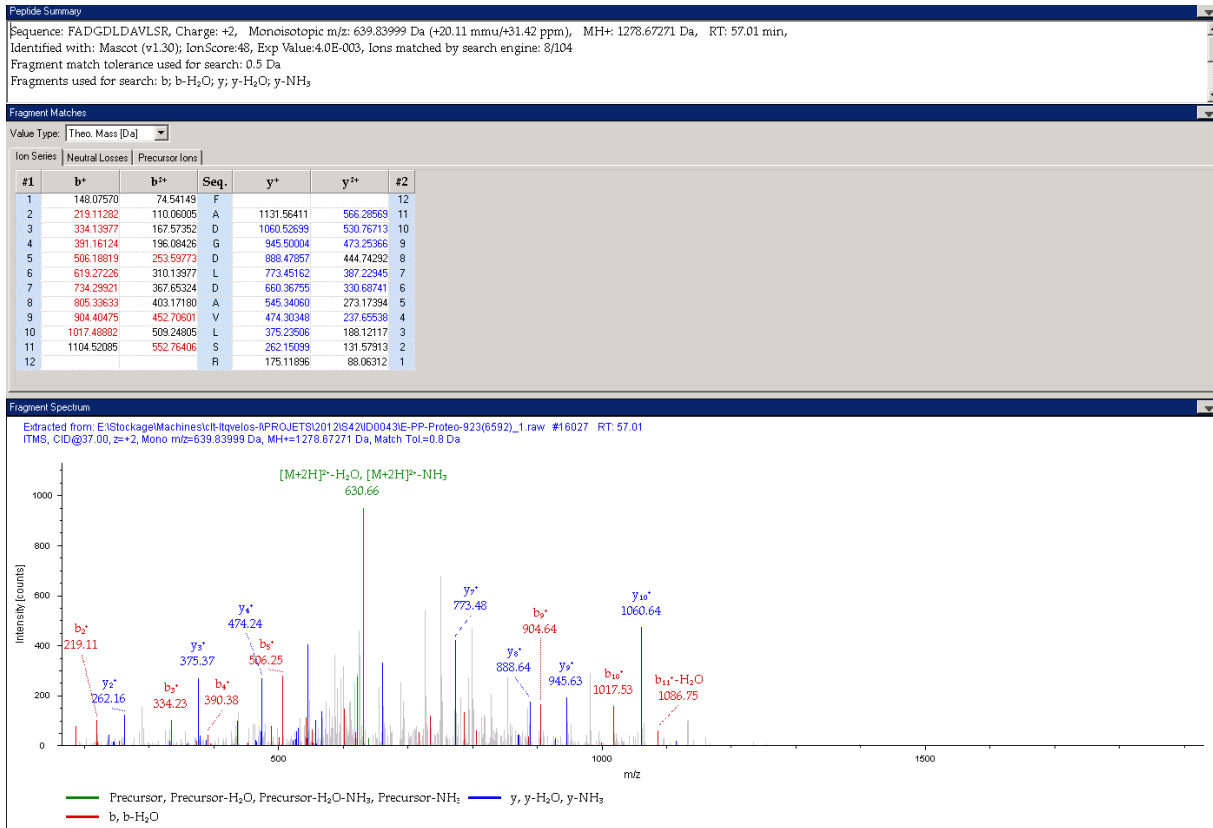

Protein references (1):

- 2-oxoglutarate dehydrogenase, mitochondrial OS=Homo sapiens GN=OGDH PE=1 SV=3 - [ODO1\_HUMAN]

Peptide Summary

Sequence: LLDTAFDLDFVK, Charge: +2, Monoisotopic m/z: 699.51999 Da (+648.86 mmu/+927.57 ppm), MH+: 1398.03271 Da, RT: 73.88 min, Identified with: Mascot (v1.30); IonScore:58, Exp Value:4.3E-004, Ions matched by search engine: 8/100  
 Fragment match tolerance used for search: 0.5 Da  
 Fragments used for search: b; b-H<sub>2</sub>O; y; y-H<sub>2</sub>O; y-NH<sub>3</sub>

Fragment Matches

Value Type: Theo. Mass [Da]

| Ion Series | Neutral Losses | Precursor Ions |      |            |           |    |
|------------|----------------|----------------|------|------------|-----------|----|
| #1         | b*             | b**            | Seq. | y*         | y**       | #2 |
| 1          | 114.09135      | 57.54931       | L    |            |           | 12 |
| 2          | 227.17542      | 114.09135      | L    | 1283.65186 | 642.32957 | 11 |
| 3          | 342.20237      | 171.60462      | D    | 1170.56779 | 585.76753 | 10 |
| 4          | 443.25005      | 222.12866      | T    | 1055.54084 | 526.27406 | 9  |
| 5          | 514.28717      | 257.64722      | A    | 954.43316  | 477.75022 | 8  |
| 6          | 661.35559      | 331.18143      | F    | 883.45604  | 442.23166 | 7  |
| 7          | 776.38254      | 388.69491      | D    | 736.36762  | 368.69745 | 6  |
| 8          | 883.46661      | 442.23694      | L    | 621.36067  | 311.18397 | 5  |
| 9          | 1004.49356     | 502.75042      | D    | 508.27680  | 254.64194 | 4  |
| 10         | 1103.56198     | 552.28463      | V    | 393.24965  | 197.12846 | 3  |
| 11         | 1250.63040     | 625.81884      | F    | 294.18123  | 147.59425 | 2  |
| 12         |                |                | K    | 147.11281  | 74.06004  | 1  |

Fragment Spectrum

Extracted from: E:\Stockage\Machines\ict-lavelos-PROJETS\2012642\ID0043E-PP-Proteo-925(6604)\_2.raw #23185 RT: 73.88  
 ITMS, CID@37.00, z=+2, Mono m/z=699.51999 Da, MH+=1398.03271 Da, Match Tol=0.8 Da

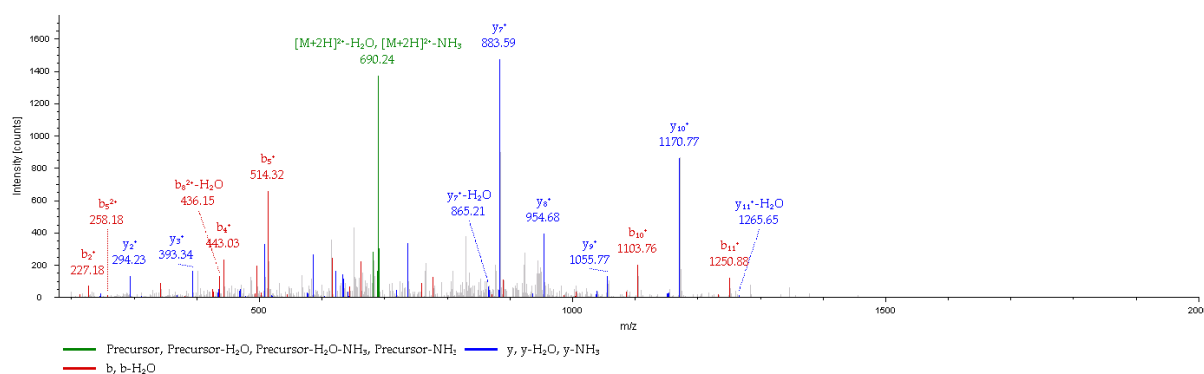

Protein references (1):

- Serine/threonine-protein phosphatase 2A 55 kDa regulatory subunit B alpha isoform OS=Homo sapiens GN=PPP2R2A PE=1 SV=1 - [2ABA\_HUMAN]

Peptide Summary

Sequence: NAAQFLSTNDK, Charge: +2, Monoisotopic m/z: 661.79999 Da (+459.35 mmu/+694.09 ppm), MH+: 1322.59271 Da, RT: 52.02 min, Identified with: Mascot (v1.30); IonScore:41, Exp Value:2.0E-002, Ions matched by search engine: 7/116  
 Fragment match tolerance used for search: 0.5 Da  
 Fragments used for search: b; b-H<sub>2</sub>O; b-NH<sub>3</sub>; y; y-H<sub>2</sub>O; y-NH<sub>3</sub>

Fragment Matches

Value Type: Theo. Mass [Da]

| Ion Series | Neutral Losses | Precursor Ions |      |            |           |    |
|------------|----------------|----------------|------|------------|-----------|----|
| #1         | b*             | b**            | Seq. | y*         | y**       | #2 |
| 1          | 115.05021      | 58.02874       | N    |            |           | 12 |
| 2          | 186.08733      | 93.54730       | A    | 1207.63178 | 604.31953 | 11 |
| 3          | 257.12445      | 129.06586      | A    | 1136.59466 | 568.80097 | 10 |
| 4          | 385.18303      | 193.09515      | Q    | 1065.55754 | 533.28241 | 9  |
| 5          | 532.25145      | 266.62936      | F    | 937.49896  | 469.25312 | 8  |
| 6          | 645.33552      | 323.17140      | L    | 790.43054  | 395.71891 | 7  |
| 7          | 758.41959      | 379.71343      | L    | 677.34647  | 339.17687 | 6  |
| 8          | 845.45162      | 423.22845      | S    | 954.26240  | 282.63484 | 5  |
| 9          | 946.49630      | 473.75329      | T    | 477.23037  | 239.11882 | 4  |
| 10         | 1060.54223     | 530.77475      | N    | 376.18269  | 188.59496 | 3  |
| 11         | 1175.56918     | 588.28823      | D    | 262.13976  | 131.57352 | 2  |
| 12         |                |                | K    | 147.11281  | 74.06004  | 1  |

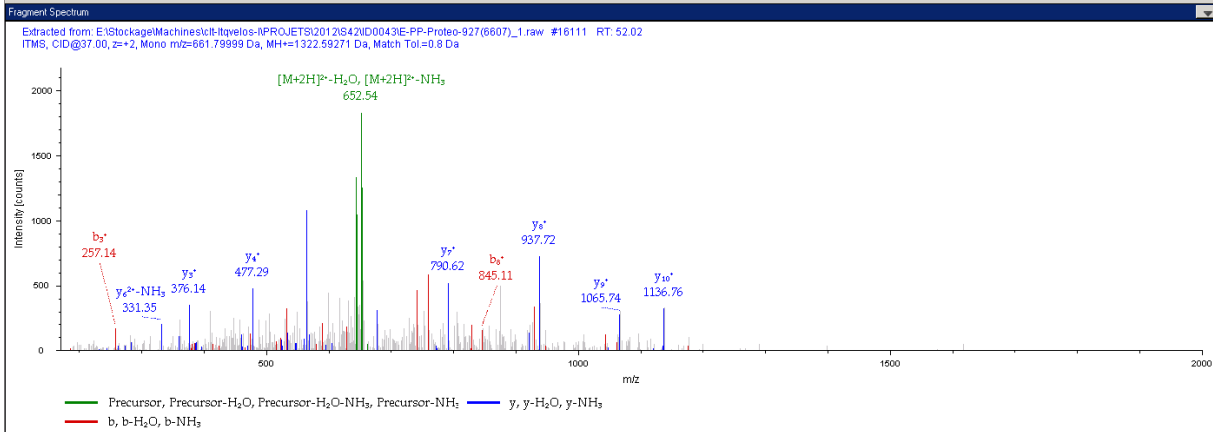



# Protein references (1):

- 60S ribosomal protein L8 OS=Homo sapiens GN=RPL8 PE=1 SV=2 - [RPL8\_HUMAN]

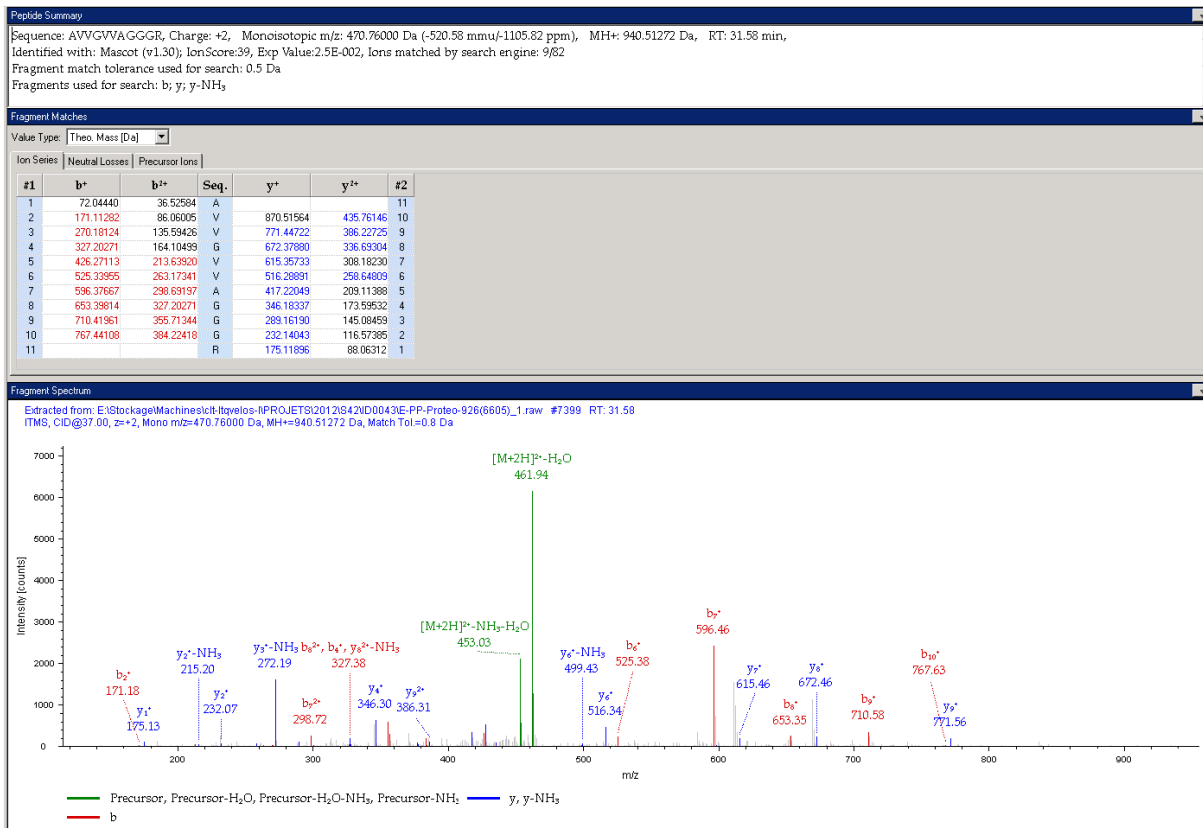

protein references (1):  
 - Peptidyl-prolyl cis-trans isomerase A OS=Homo sapiens GN=PPIA PE=1 SV=2 - [PPIA\_HUMAN]

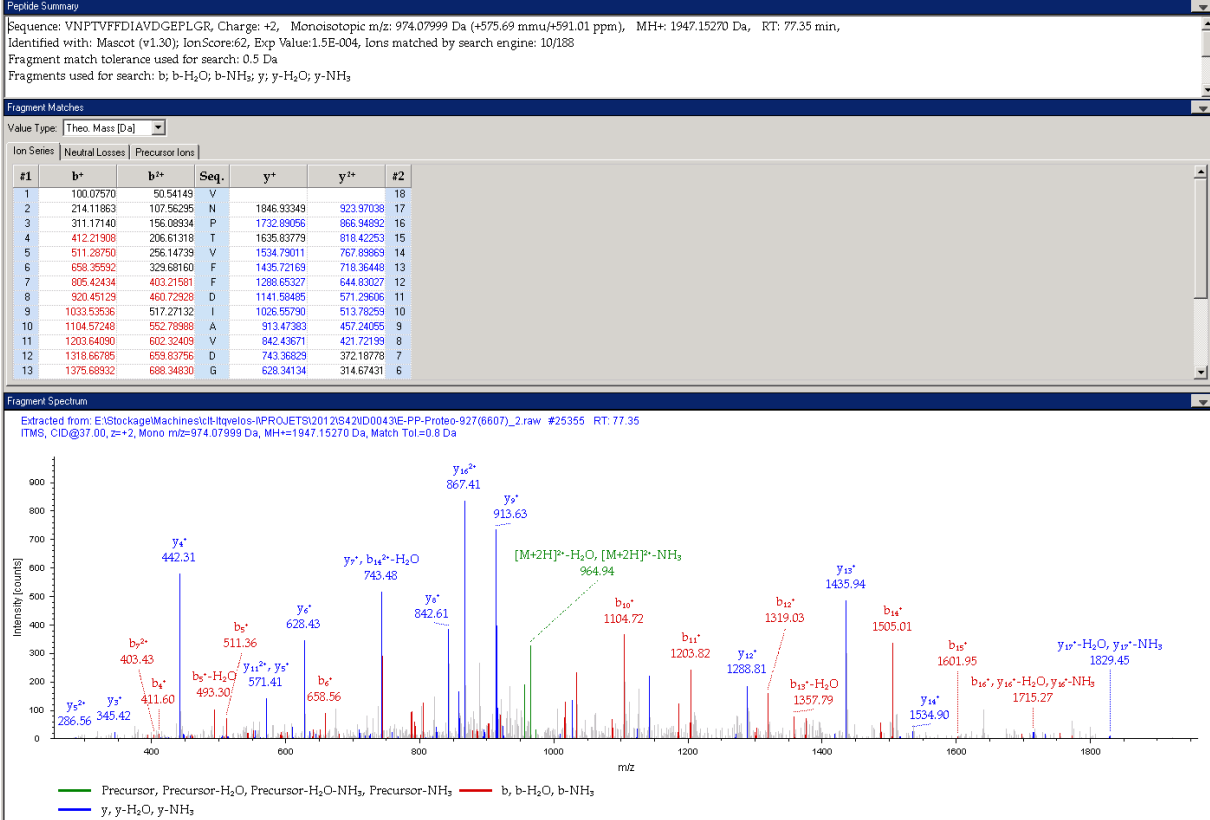

Protein references (1):

- 2,4-dienoyl-CoA reductase, mitochondrial OS=Homo sapiens GN=DECR1 PE=1 SV=1 - [DECR\_HUMAN]

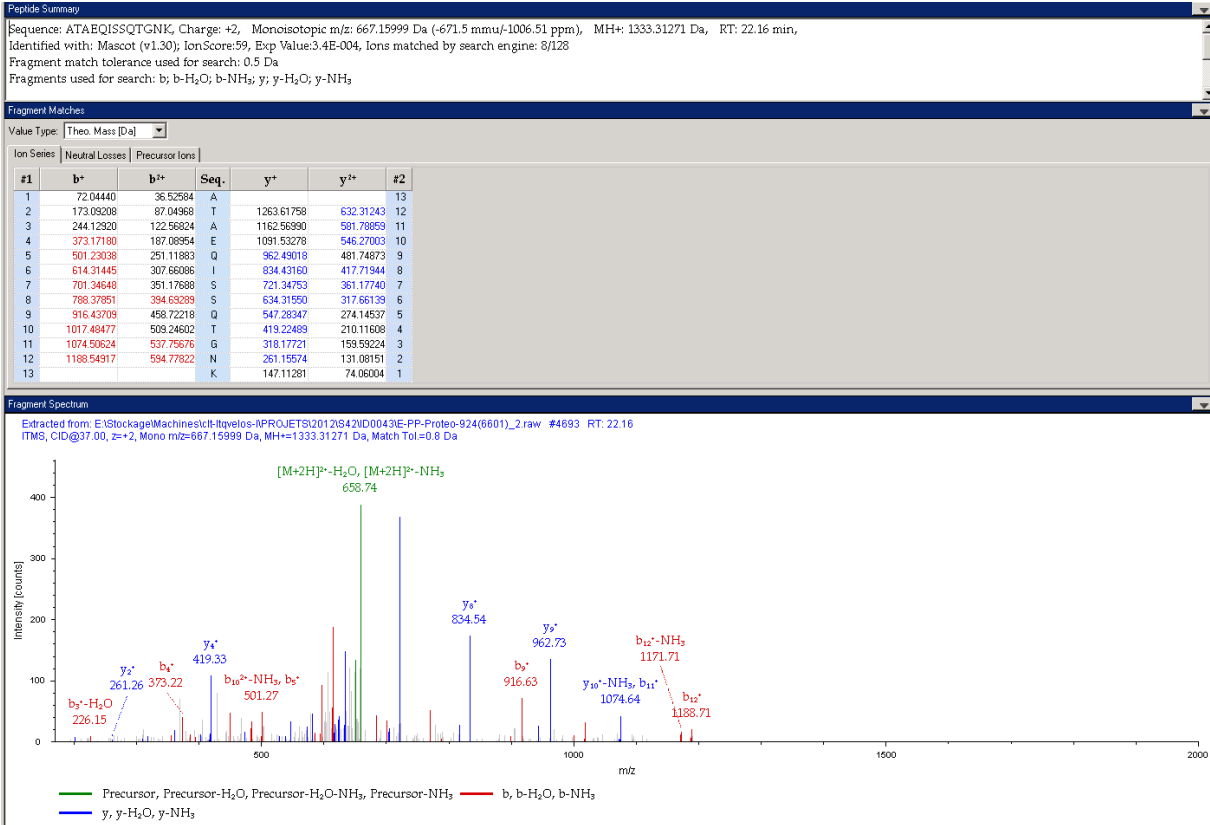

## Protein references (1):

- LYR motif-containing protein 2 OS=Homo sapiens GN=LYRM2 PE=1 SV=1 - [LYRM2\_HUMAN]

Peptide Summary

Sequence: YLKDWAR, Charge: +2, Monoisotopic m/z: 476.80000 Da (+544.58 mmu/+1142.16 ppm), MH+: 952.59272 Da, RT: 45.54 min, Identified with: Mascot (v1.30), IonScore:40, Exp Value:2.4E-002, Ions matched by search engine: 5/56  
 Fragment match tolerance used for search: 0.5 Da  
 Fragments used for search: b, b-H<sub>2</sub>O; b-NH<sub>3</sub>; y, y-H<sub>2</sub>O; y-NH<sub>3</sub>

Fragment Matches

Value Type: Theor. Mass [Da]

| Ion Series | Neutral Losses | Precursor Ions |      |           |           |    |
|------------|----------------|----------------|------|-----------|-----------|----|
| #1         | b*             | b**            | Seq. | y*        | y**       | #2 |
| 1          | 164.07060      | 82.53894       | Y    |           |           | 7  |
| 2          | 277.15467      | 139.08097      | L    | 788.44139 | 394.72433 | 6  |
| 3          | 405.24964      | 203.12846      | K    | 675.35732 | 338.18230 | 5  |
| 4          | 520.27659      | 260.64193      | D    | 547.26235 | 274.13481 | 4  |
| 5          | 706.35591      | 353.68159      | W    | 432.22540 | 216.62134 | 3  |
| 6          | 777.39303      | 389.20015      | A    | 246.15508 | 123.58168 | 2  |
| 7          |                |                | R    | 175.11896 | 88.06312  | 1  |

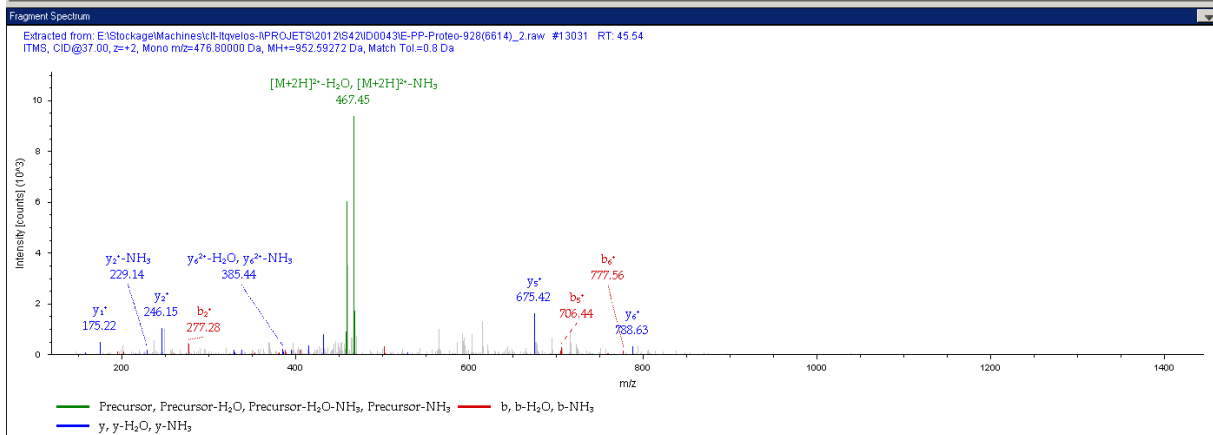

# Protein references (1):

- S-arrestin OS=Homo sapiens GN=SAG PE=2 SV=3 - [ARRS\_HUMAN]

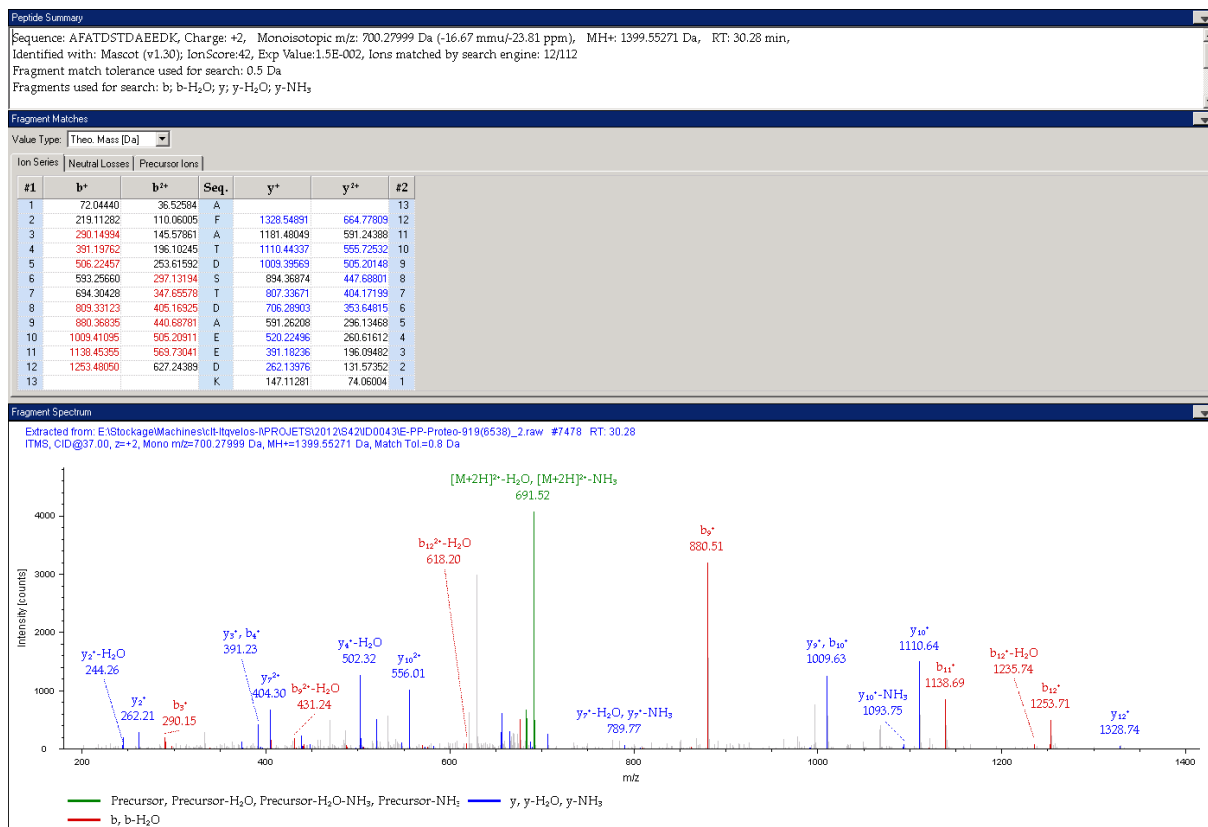

Protein references (1):

- DNA repair protein complementing XP-C cells OS=Homo sapiens GN=XPC PE=1 SV=4 - [XPC\_HUMAN]

Peptide Summary

Sequence: KVAKVTVK, Charge: +2, Monoisotopic m/z: 436.31082 Da (-489.79 mmu/-1122.57 ppm), MH+: 871.61437 Da, RT: 21.59 min, Identified with: Mascot (v1.30), IonScore:46, Exp Value:6.4E-003, Ions matched by search engine: 7/70, Fragment match tolerance used for search: 0.5 Da, Fragments used for search: b; b-H<sub>2</sub>O; b-NH<sub>3</sub>; y; y-H<sub>2</sub>O; y-NH<sub>3</sub>

Fragment Matches

Value Type: Theo. Mass [Da]

Ion Series: Neutral Losses | Precursor Ions | TAG PE=2 SV=3 - [XPC\_HUMAN]

| #1 | b*        | b**       | Seq. | y*        | y**       | #2 |
|----|-----------|-----------|------|-----------|-----------|----|
| 1  | 129.10225 | 65.05476  | K    |           |           | 8  |
| 2  | 228.17067 | 114.58897 | V    | 744.49784 | 372.75256 | 7  |
| 3  | 299.20779 | 150.10753 | A    | 645.42342 | 323.21935 | 6  |
| 4  | 427.30276 | 214.15502 | K    | 574.38230 | 287.69979 | 5  |
| 5  | 526.37118 | 263.68923 | V    | 446.29733 | 223.65230 | 4  |
| 6  | 627.41895 | 314.21307 | T    | 347.22891 | 174.11809 | 3  |
| 7  | 726.48728 | 363.74728 | V    | 246.18123 | 123.59425 | 2  |
| 8  |           |           | K    | 147.11281 | 74.06004  | 1  |

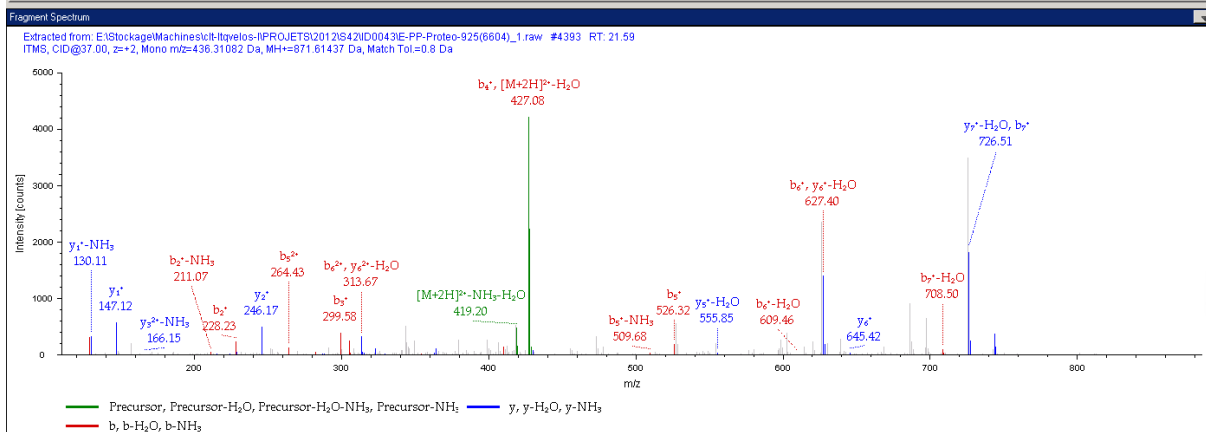

Protein references (1):

- Cytidine and dCMP deaminase domain-containing protein 1 OS=Homo sapiens GN=CDADC1 PE=2 SV=1 - [CDAC1\_HUMAN]

Peptide Summary

Sequence: RTGLVVK, Charge: +2, Monoisotopic m/z: 436.32000 Da (+30.19 mmu/+69.19 ppm), MH+: 871.63272 Da, RT: 21.24 min, Identified with: Mascot (v1.30), IonScore:42, Exp Value:1.6E-002, Ions matched by search engine: 5/70, Fragment match tolerance used for search: 0.5 Da, Fragments used for search: b; b-H<sub>2</sub>O; b-NH<sub>3</sub>; y; y-H<sub>2</sub>O; y-NH<sub>3</sub>

Fragment Matches

Value Type: Theo. Mass [Da]

| Ion Series | Neutral Losses | Precursor Ions |      |           |           |    |
|------------|----------------|----------------|------|-----------|-----------|----|
| #1         | b*             | b**            | Seq. | y*        | y**       | #2 |
| 1          | 157.10840      | 79.05784       | R    |           |           | 8  |
| 2          | 258.15608      | 129.58168      | T    | 715.47129 | 358.23928 | 7  |
| 3          | 315.17755      | 158.09241      | G    | 614.42361 | 307.71544 | 6  |
| 4          | 428.26162      | 214.63445      | L    | 557.40214 | 279.20471 | 5  |
| 5          | 527.33004      | 264.16866      | V    | 444.31807 | 222.66267 | 4  |
| 6          | 626.39846      | 313.70287      | V    | 345.24965 | 173.12946 | 3  |
| 7          | 725.46688      | 363.23708      | V    | 246.18123 | 123.59425 | 2  |
| 8          |                |                | K    | 147.11281 | 74.06004  | 1  |

Fragment Spectrum

Extracted from: E:\Storage\Machines\uk-lqvelos-IPROJECTS\2012\642\ID0043E-PP-Proteo-929\6633\_1.raw #4172 RT: 21.24 ITMS, CID@37.00, z=+2, Mono m/z=436.32000 Da, MH+=871.63272 Da, Match Tol=0.8 Da

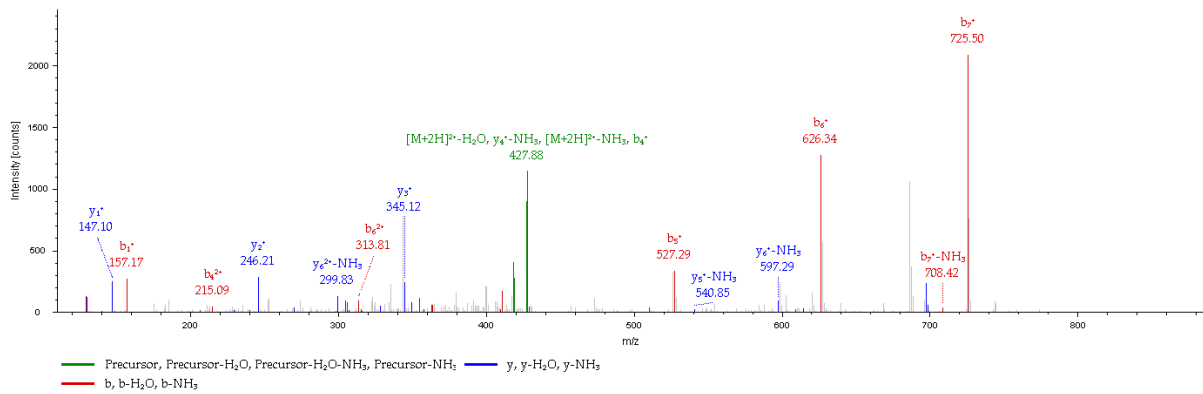

Protein references (1):

- Transaldolase OS=Homo sapiens GN=TALDO1 PE=1 SV=2 - [TALDO\_HUMAN]

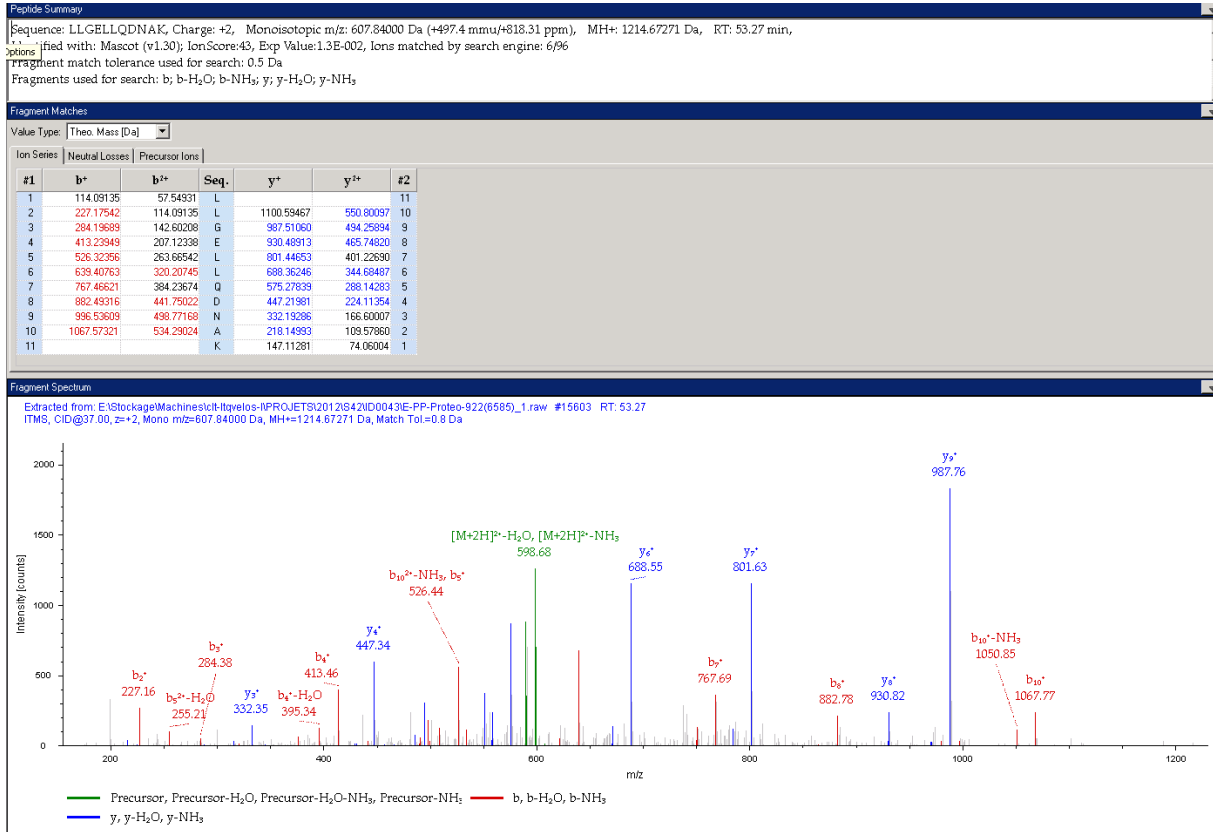



Protein references (1):

- Importin subunit beta-1 OS=Homo sapiens GN=KPNB1 PE=1 SV=2 - [IMB1\_HUMAN]

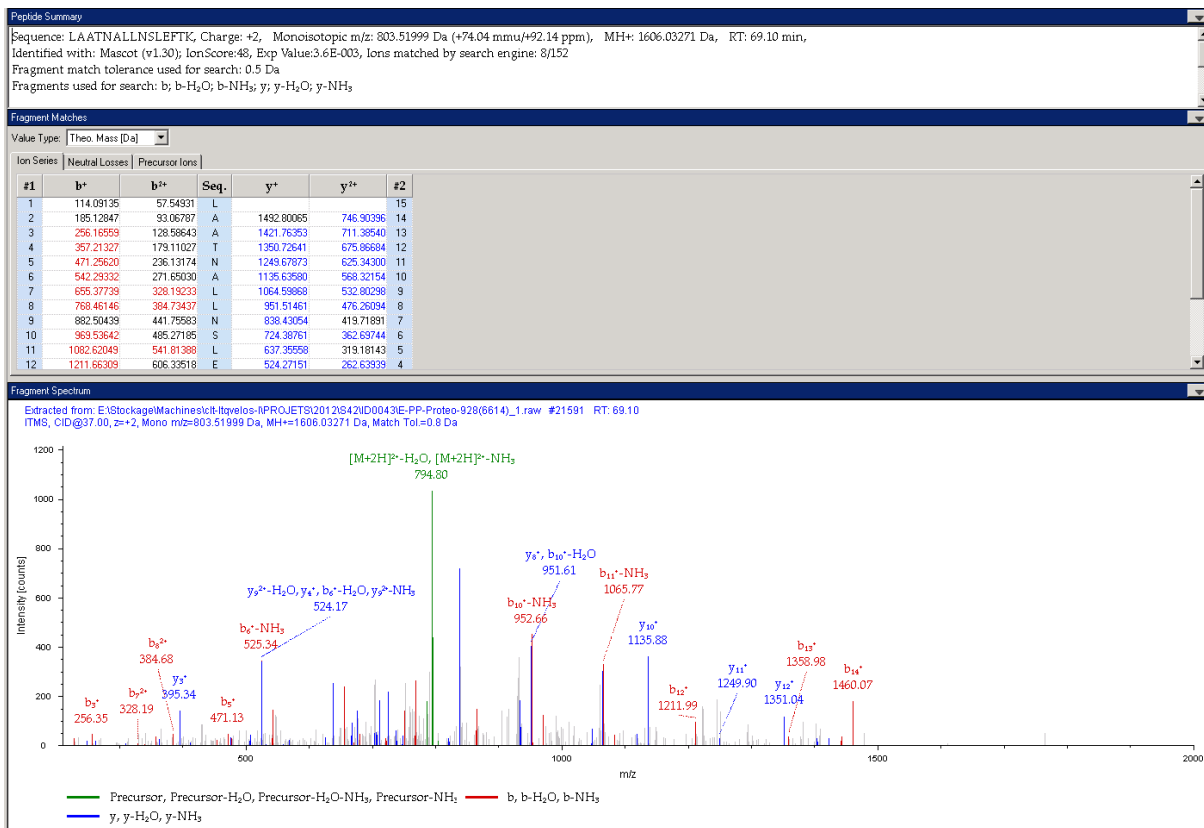

Protein references (1):

- Dihydropolypyllysine-residue acetyltransferase component of pyruvate dehydrogenase complex, mitochondrial OS=Homo sapiens GN=DLAT PE=1 SV=3 - [ODP2\_HUMAN]

Peptide Summary

Sequence: GVETIANDVSLATK, Charge: +2, Monoisotopic m/z: 759.27999 Da (+365.7 mmu/+481.64 ppm), MH+: 1517.55271 Da, RT: 69.59 min, Identified with: Mascot (v1.30); IonScore:53, Exp Value:1.2E-003, Ions matched by search engine: 9/150  
 Fragment match tolerance used for search: 0.5 Da  
 Fragments used for search: b; b-H<sub>2</sub>O; b-NH<sub>3</sub>; y; y-H<sub>2</sub>O; y-NH<sub>3</sub>

Fragment Matches

Value Type: Theo. Mass [Da]

| #1 | b*         | b <sup>+</sup> | Seq. | y*         | y <sup>+</sup> | #2 |
|----|------------|----------------|------|------------|----------------|----|
| 1  | 58.02875   | 2351801        | G    |            |                | 15 |
| 2  | 157.09717  | 79.05222       | V    | 1459.80032 | 730.40380      | 14 |
| 3  | 286.13977  | 143.57352      | E    | 1360.73190 | 680.96359      | 13 |
| 4  | 387.18745  | 194.09736      | T    | 1231.68930 | 616.34829      | 12 |
| 5  | 500.27152  | 250.63940      | I    | 1130.64162 | 565.82445      | 11 |
| 6  | 571.30864  | 286.15796      | A    | 1017.55795 | 509.28241      | 10 |
| 7  | 685.35157  | 343.17942      | N    | 946.52043  | 473.76385      | 9  |
| 8  | 800.37852  | 400.63290      | D    | 832.47790  | 416.74239      | 8  |
| 9  | 899.44694  | 450.22711      | V    | 717.45095  | 359.22891      | 7  |
| 10 | 998.51536  | 499.76132      | V    | 618.38213  | 309.69470      | 6  |
| 11 | 1085.54739 | 543.27733      | S    | 519.31371  | 260.16049      | 5  |
| 12 | 1198.63146 | 599.81937      | L    | 432.28168  | 216.64448      | 4  |

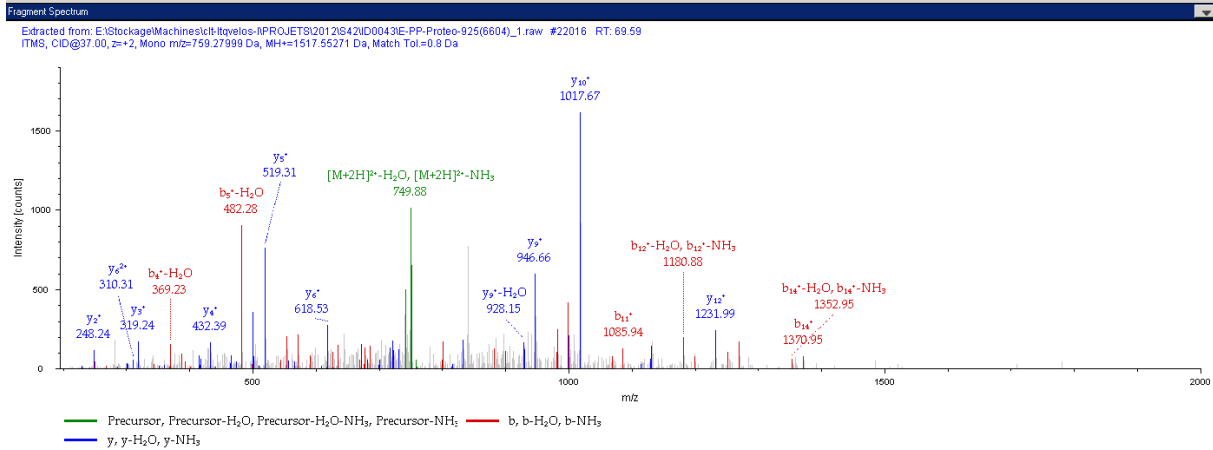

Protein references (1):

- Inter-alpha-trypsin inhibitor heavy chain H1 OS=Homo sapiens GN=ITIH1 PE=1 SV=3 - [ITIH1\_HUMAN]

Peptide Summary

Sequence: GSLVQASEANLQAAQDFVR, Charge: +2, Monoisotopic m/z: 1002.15999 Da (-351.12 mmu/-350.37 ppm), MH+: 2003.31270 Da, RT: 65.50 min, Identified with: Mascot (v1.30); IonScore:45, Exp Value:7.6E-003, Ions matched by search engine: 10/200  
 Fragment match tolerance used for search: 0.5 Da  
 Fragments used for search: b; b-H<sub>2</sub>O; b-NH<sub>3</sub>; y; y-H<sub>2</sub>O; y-NH<sub>3</sub>

Fragment Matches

Value Type: Theo. Mass [Da]

| Ion Series | Neutral Losses | Precursor Ions |      |            |           |    |
|------------|----------------|----------------|------|------------|-----------|----|
| #1         | b*             | b**            | Seq. | y*         | y**       | #2 |
| 1          | 58.02875       | 23.51801       | G    |            |           | 19 |
| 2          | 145.06078      | 73.03403       | S    | 1946.99312 | 974.00020 | 18 |
| 3          | 258.14485      | 129.57606      | L    | 1859.96109 | 930.48418 | 17 |
| 4          | 357.21327      | 179.11027      | V    | 1746.87702 | 873.94215 | 16 |
| 5          | 485.27185      | 243.13956      | Q    | 1647.80960 | 824.40794 | 15 |
| 6          | 556.30897      | 278.65912      | A    | 1519.75002 | 760.37965 | 14 |
| 7          | 643.34100      | 322.17414      | S    | 1448.71290 | 724.86009 | 13 |
| 8          | 772.30360      | 386.63544      | E    | 1361.68907 | 681.34407 | 12 |
| 9          | 843.42072      | 422.21400      | A    | 1232.63827 | 616.82277 | 11 |
| 10         | 957.46365      | 479.23546      | N    | 1161.60115 | 581.30421 | 10 |
| 11         | 1070.54772     | 535.77790      | L    | 1047.95822 | 524.28275 | 9  |
| 12         | 1198.60630     | 599.80679      | Q    | 934.47415  | 467.74071 | 8  |

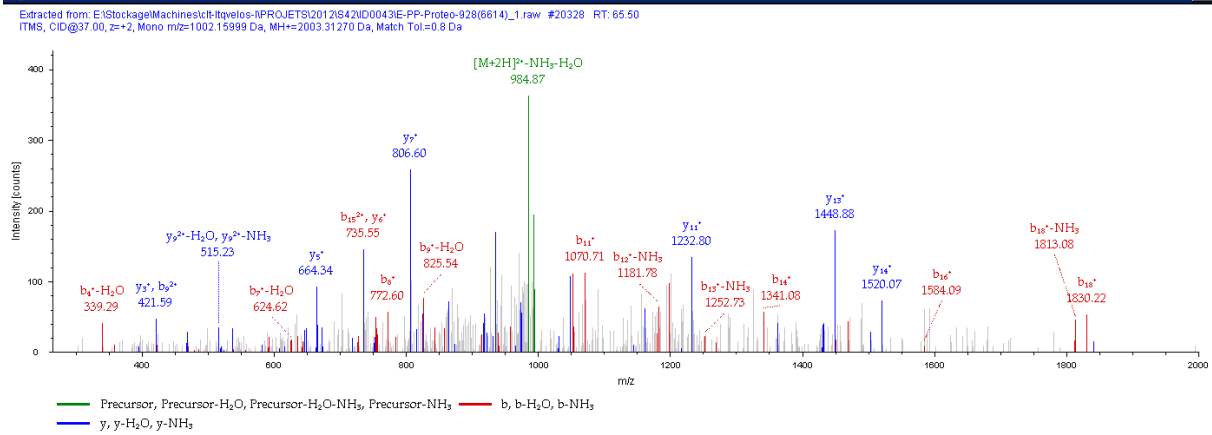

Protein references (2):

- Ubiquitin-conjugating enzyme E2 N OS=Homo sapiens GN=UBE2N PE=1 SV=1 - [UBE2N\_HUMAN]

Peptide Summary

Sequence: TNEAQALETAR, Charge: +2, Monoisotopic m/z: 602.32000 Da (+18.14 mmu/+30.12 ppm), MH+: 1203.63271 Da, RT: 31.80 min, Identified with: Mascot (v1.30); IonScore:46, Exp Value:7.2E-003, Ions matched by search engine: 9/114, Fragment match tolerance used for search: 0.5 Da, Fragments used for search: b; b-H<sub>2</sub>O; b-NH<sub>3</sub>; y; y-H<sub>2</sub>O; y-NH<sub>3</sub>

Fragment Matches

Value Type: Theo. Mass [Da]

| Ion Series | Neutral Losses | Precursor Ions |      |            |           |    |
|------------|----------------|----------------|------|------------|-----------|----|
| #1         | b*             | b**            | Seq. | y*         | y**       | #2 |
| 1          | 102.05496      | 51.53112       | T    |            |           | 11 |
| 2          | 216.09789      | 108.05258      | N    | 1102.54978 | 551.77903 | 10 |
| 3          | 345.14049      | 173.07388      | E    | 988.50585  | 484.75656 | 9  |
| 4          | 416.17761      | 208.09244      | A    | 859.46325  | 430.23526 | 8  |
| 5          | 544.23619      | 272.02173      | Q    | 786.42613  | 394.71670 | 7  |
| 6          | 615.27331      | 308.14029      | A    | 680.36755  | 300.68741 | 6  |
| 7          | 728.35738      | 364.68233      | I    | 593.33043  | 295.16885 | 5  |
| 8          | 857.39398      | 429.20363      | E    | 476.24636  | 238.62682 | 4  |
| 9          | 958.44766      | 479.72747      | T    | 347.20376  | 174.10552 | 3  |
| 10         | 1029.48478     | 515.24603      | A    | 246.15608  | 123.58168 | 2  |
| 11         |                |                | R    | 175.11896  | 88.06312  | 1  |

Fragment Spectrum

Extracted from: E:\Stockage\Machines\itc-Itayelos-IPROJET9\2012\642\ID0043E-PP-Proteo-927\6607\_1.raw #8324 RT: 31.80 ITMS, CID@37.00, z=+2, Mono m/z=602.32000 Da, MH+=1203.63271 Da, Match Tol=0.8 Da

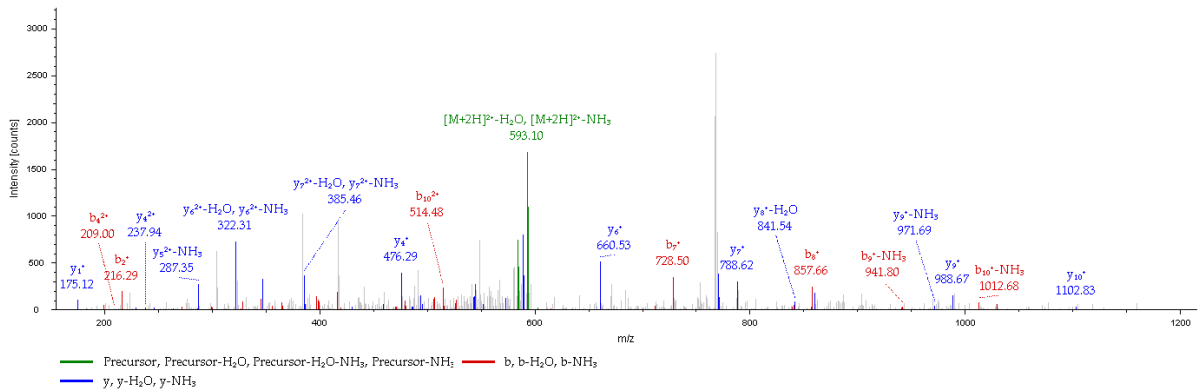

Protein references (1):

- T-complex protein 1 subunit eta OS=Homo sapiens GN=CCT7 PE=1 SV=2 - [TCPH\_HUMAN]

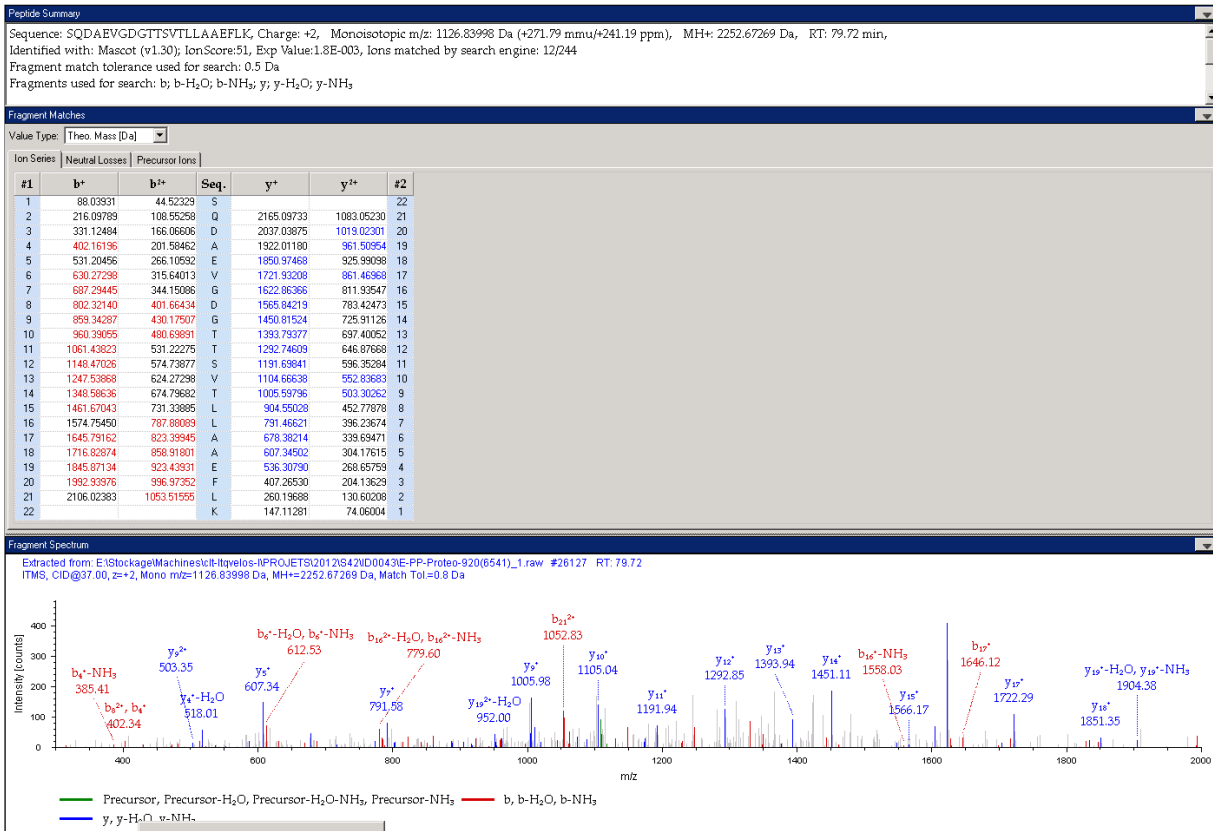

Protein references (1):

- Pyruvate dehydrogenase E1 component subunit beta, mitochondrial OS=Homo sapiens GN=PDHB PE=1 SV=3 - [ODPB\_HUMAN]

Peptide Summary

Sequence: VFLLGEEVAQYDYGAYK, Charge: +2, Monoisotopic m/z: 901.55999 Da (+106.03 mmu/+117.61 ppm), MH+: 1802.11270 Da, RT: 68.22 min, Identified with: Mascot (v1.30) IonScore:54, Exp Value:9.3E-004, Ions matched by search engine: 11/144  
 Fragment match tolerance used for search: 0.5 Da  
 Fragments used for search: b; b-H<sub>2</sub>O; b-NH<sub>3</sub>; y; y-H<sub>2</sub>O; y-NH<sub>3</sub>

Fragment Matches

Value Type: Theo. Mass [Da]

| Ion Series | Neutral Losses | Precursor Ions | Seq. | y <sup>+</sup> | y <sup>2+</sup> | #2 |
|------------|----------------|----------------|------|----------------|-----------------|----|
| 1          |                |                | V    |                |                 | 16 |
| 2          |                |                | F    | 1702.83234     | 851.91981       | 15 |
| 3          |                |                | L    | 1555.76392     | 778.38560       | 14 |
| 4          |                |                | L    | 1442.67985     | 721.84356       | 13 |
| 5          |                |                | G    | 1329.59578     | 665.30153       | 12 |
| 6          |                |                | E    | 1272.57431     | 636.79079       | 11 |
| 7          |                |                | E    | 1143.53171     | 572.26549       | 10 |
| 8          |                |                | V    | 1074.48911     | 507.74819       | 9  |
| 9          |                |                | A    | 915.42059      | 458.21298       | 8  |
| 10         |                |                | Q    | 844.39357      | 422.69542       | 7  |
| 11         |                |                | Y    | 716.32493      | 358.66613       | 6  |
| 12         |                |                | D    | 553.26167      | 277.13447       | 5  |
| 13         |                |                | G    | 438.23472      | 219.62100       | 4  |
| 14         |                |                | A    | 381.21325      | 191.11026       | 3  |
| 15         |                |                | Y    | 310.17613      | 155.59170       | 2  |
| 16         |                |                | K    | 147.11281      | 74.06004        | 1  |

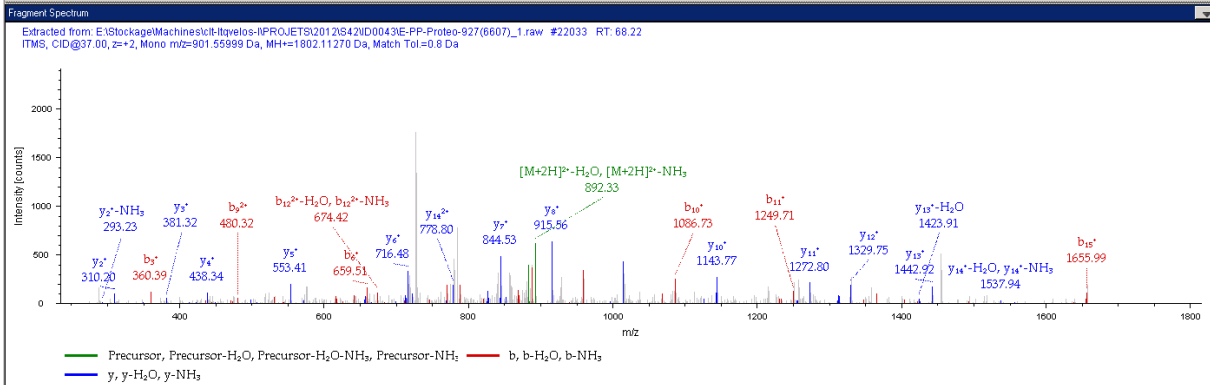

Protein references (1):

- Growth arrest-specific protein 8 OS=Homo sapiens GN=GAS8 PE=1 SV=1 - [GAS8\_HUMAN]

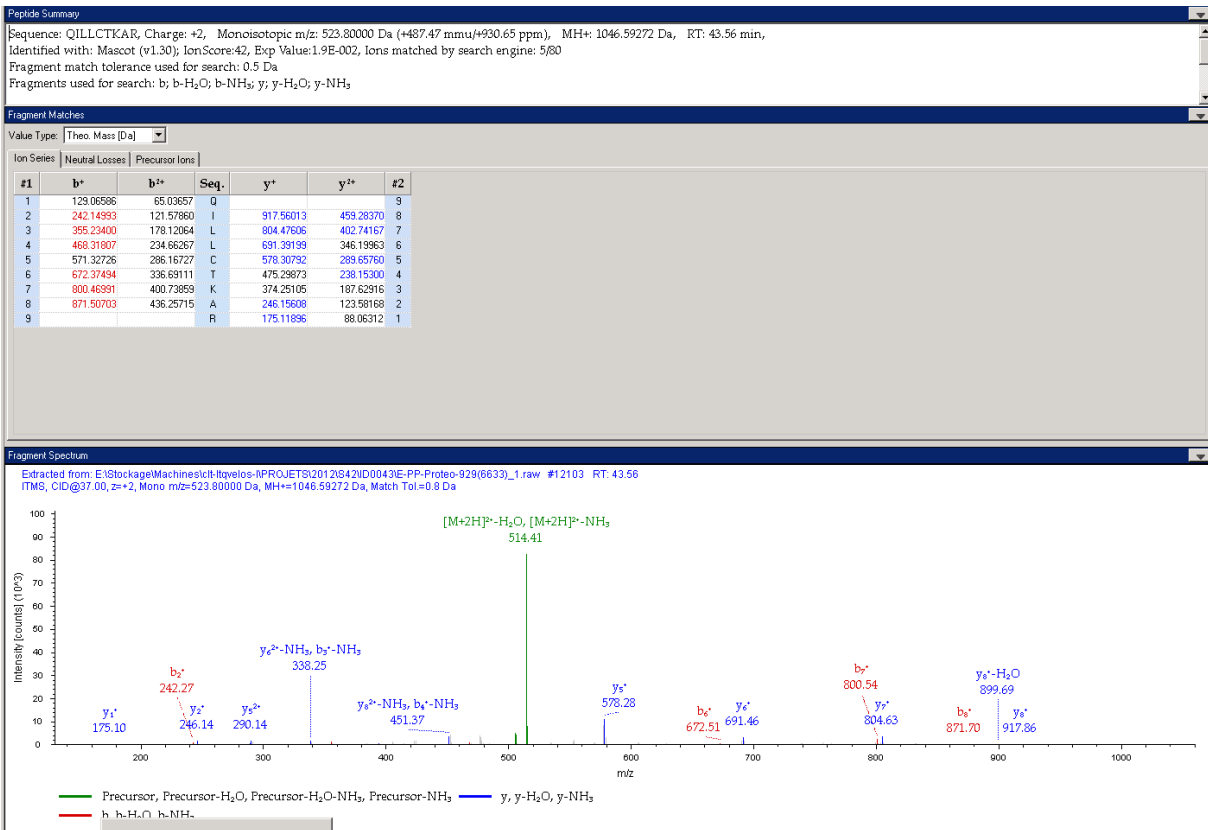

## Protein references (1):

- Proteasome subunit alpha type-6 OS=Homo sapiens GN=PSMA6 PE=1 SV=1 - [PSA6\_HUMAN]

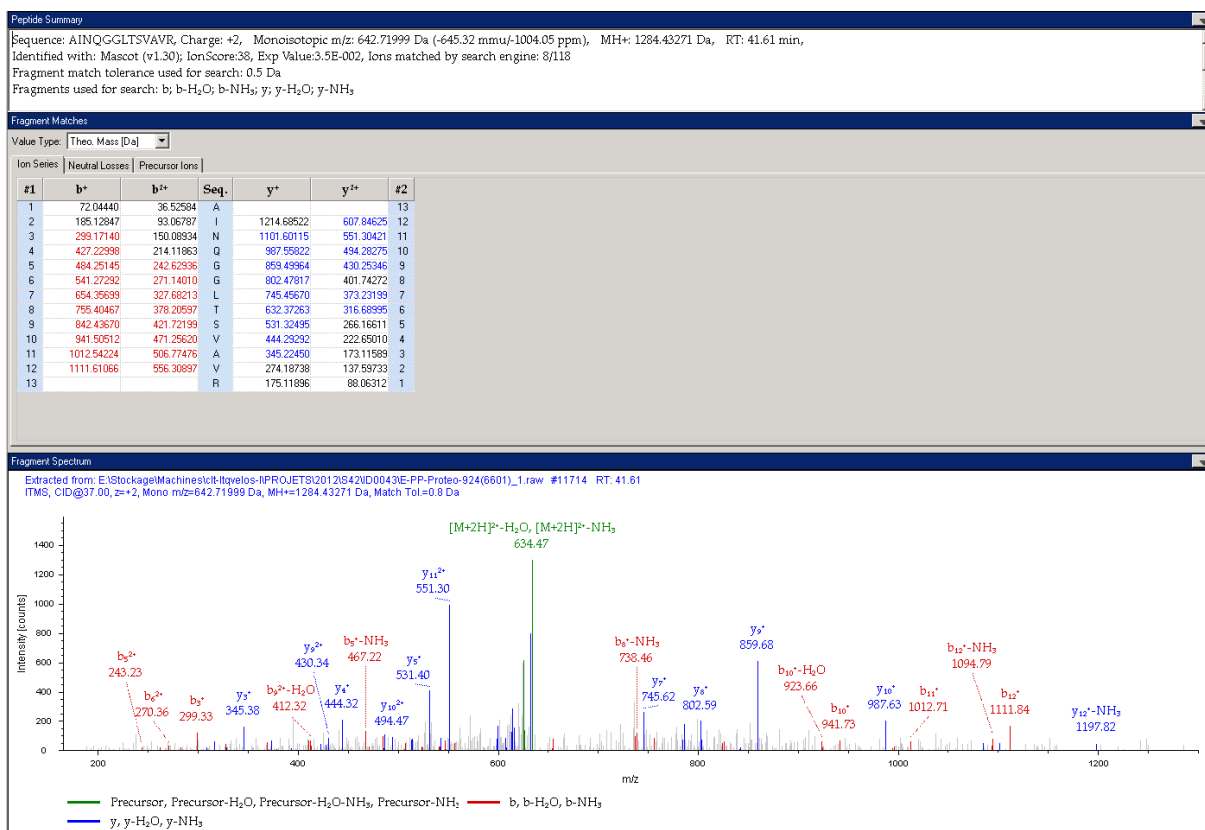



Protein references (1):

- General vesicular transport factor p115 OS=Homo sapiens GN=USO1 PE=1 SV=2 - [USO1\_HUMAN]

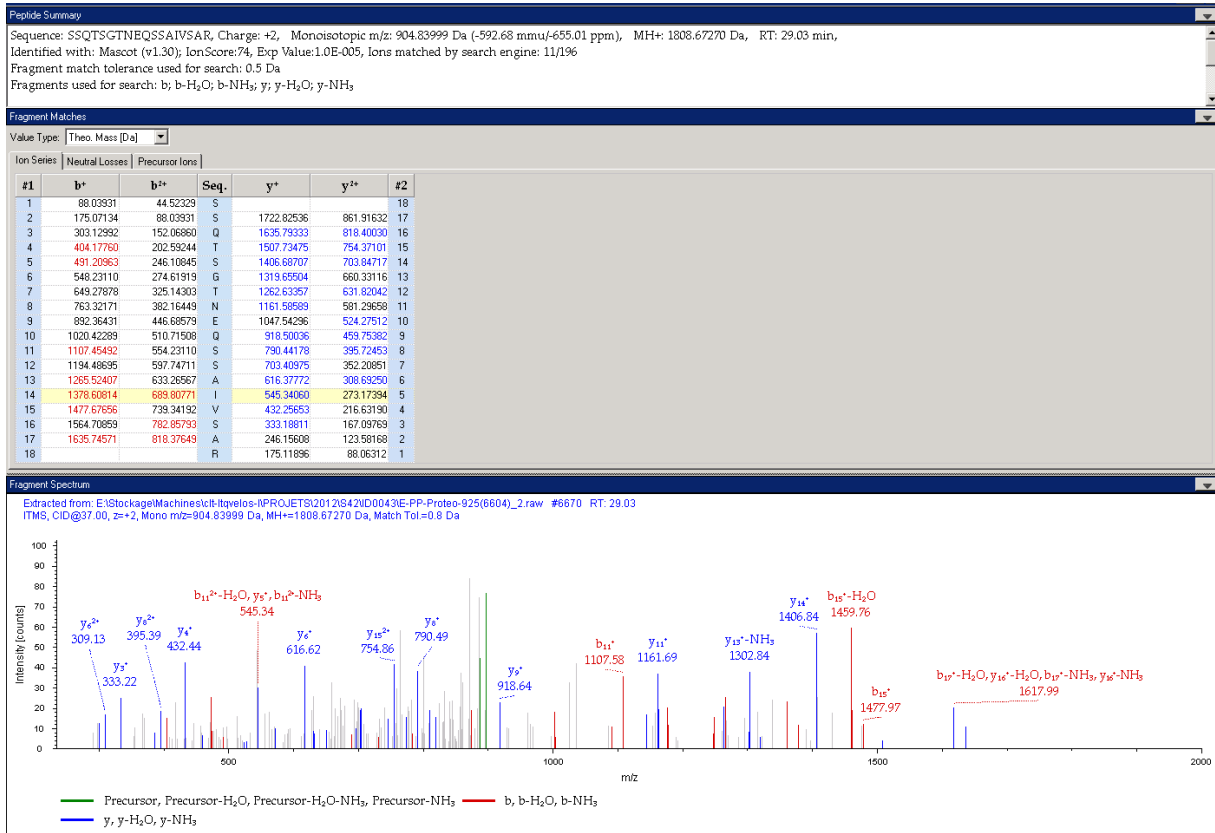

Protein references (1):

- Forkhead-associated domain-containing protein 1 OS=Homo sapiens GN=FHAD1 PE=2 SV=2 - [FHAD1\_HUMAN]

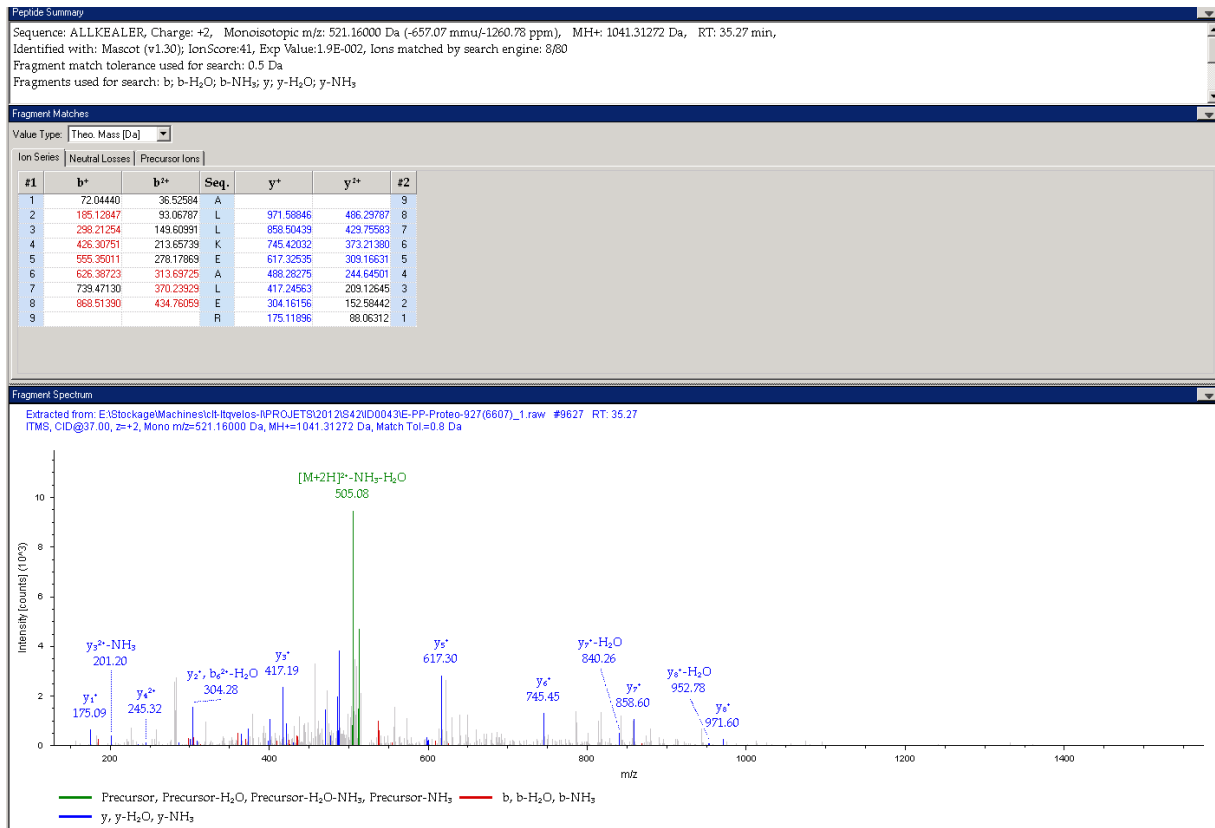

Protein references (1):

- GTP-binding nuclear protein Ran OS=Homo sapiens GN=RAN PE=1 SV=3 - [RAN\_HUMAN]

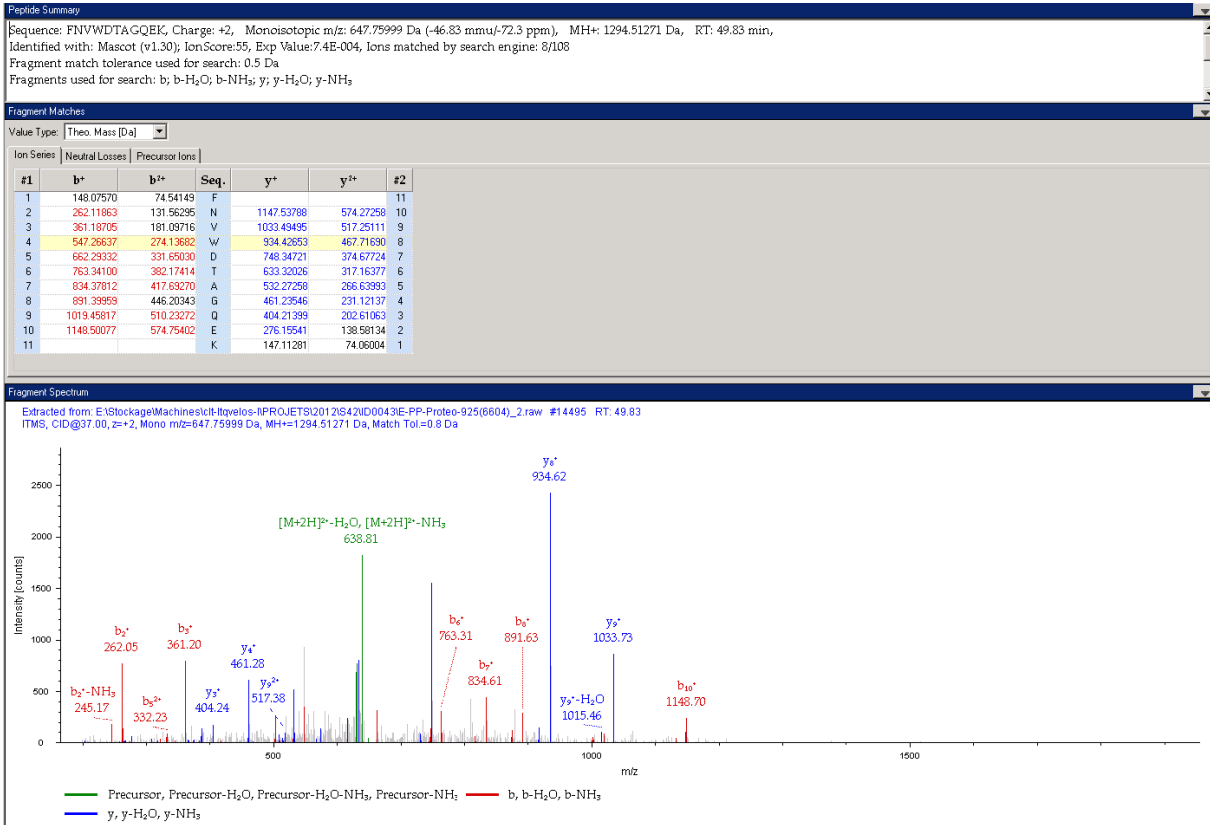

Protein references (1):

- Isocitrate dehydrogenase [NAD] subunit alpha, mitochondrial OS=Homo sapiens GN=IDH3A PE=1 SV=1 - [IDH3A\_HUMAN]

Peptide Summary

Sequence: TPYTDVNIIVTIR, Charge: +2, Monoisotopic m/z: 696.35999 Da (-20.14 mmu/-28.91 ppm), MH+: 1391.71271 Da, RT: 53.18 min,  
 Identified with: Mascot (v1.30); IonScore:49, Exp Value:2.8E-003, Ions matched by search engine: 7/116  
 Fragment match tolerance used for search: 0.5 Da  
 Fragments used for search: b; b-H<sub>2</sub>O; b-NH<sub>3</sub>; y; y-H<sub>2</sub>O; y-NH<sub>3</sub>

Fragment Matches

Value Type: Theo. Mass [Da]

| #1 | Neutral Losses |                                  | Seq. | Precursor Ions |                                 | #2 |
|----|----------------|----------------------------------|------|----------------|---------------------------------|----|
|    | b <sup>+</sup> | b <sup>+</sup> -H <sub>2</sub> O |      | y <sup>+</sup> | y <sup>+</sup> -NH <sub>3</sub> |    |
| 1  | 102.05496      | 51.53112                         | T    |                |                                 | 12 |
| 2  | 199.10773      | 100.05750                        | P    | 1290.70527     | 645.05627                       | 11 |
| 3  | 362.17105      | 181.58916                        | Y    | 1193.65250     | 597.32989                       | 10 |
| 4  | 463.21873      | 232.11300                        | T    | 1030.59316     | 515.79823                       | 9  |
| 5  | 578.24568      | 289.62648                        | D    | 929.54190      | 465.27439                       | 8  |
| 6  | 677.31410      | 339.16069                        | V    | 814.51495      | 407.76091                       | 7  |
| 7  | 791.35703      | 396.18215                        | N    | 715.44613      | 358.22670                       | 6  |
| 8  | 904.44110      | 452.72419                        | I    | 601.40320      | 301.20524                       | 5  |
| 9  | 1003.50952     | 502.25840                        | V    | 488.31913      | 244.66320                       | 4  |
| 10 | 1104.55720     | 552.78224                        | T    | 389.25071      | 195.12899                       | 3  |
| 11 | 1217.64127     | 609.32427                        | I    | 288.20303      | 144.60515                       | 2  |
| 12 |                |                                  | R    | 175.11896      | 88.06312                        | 1  |

Fragment Spectrum

Extracted from: E:\Stockage\Machines\it-ltvelos-iprojets\2012\842\ID0043E-PP-Proteo-919(6538)\_2.raw #16485 RT: 53.18  
 ITMS, CID@37.00, z=+2, Mono m/z=696.35999 Da, MH+=1391.71271 Da, Match Tol=0.8 Da

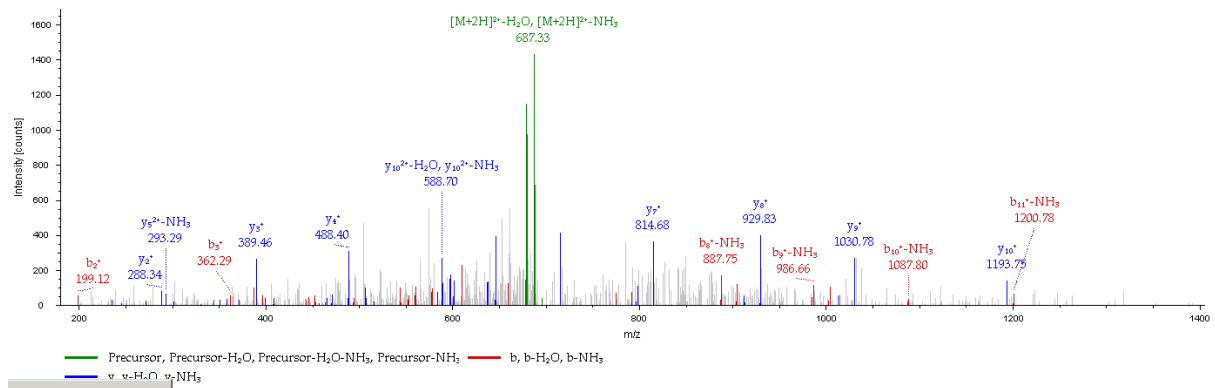

Protein references (1):

- Fumarylacetoacetase OS=Homo sapiens GN=FAH PE=1 SV=2 - [FAAA\_HUMAN]

Peptide Summary

Sequence: VFLQNLLSVSQAR, Charge: +2, Monoisotopic m/z: 737.79999 Da (-122.58 mmu/-166.14 ppm), MH+: 1474.59271 Da, RT: 68.35 min, Identified with: Mascot (v1.30), IonScore:42, Exp Value:1.5E-002, Ions matched by search engine: 8/118  
 Fragment match tolerance used for search: 0.5 Da  
 Fragments used for search: b; b-H<sub>2</sub>O; b-NH<sub>3</sub>; y; y-H<sub>2</sub>O; y-NH<sub>3</sub>

Fragment Matches

Value Type: Theo. Mass [Da]

| Ion Series | Neutral Losses | Precursor Ions |      |            |           |    |
|------------|----------------|----------------|------|------------|-----------|----|
| #1         | b*             | b**            | Seq. | y*         | y**       | #2 |
| 1          | 100.07570      | 50.54149       | V    |            |           | 13 |
| 2          | 247.14412      | 124.07570      | F    | 1375.76928 | 688.38628 | 12 |
| 3          | 360.22819      | 180.61773      | L    | 1228.70086 | 614.85407 | 11 |
| 4          | 488.28677      | 244.64702      | Q    | 1115.61679 | 558.31203 | 10 |
| 5          | 602.32970      | 301.66949      | N    | 987.55821  | 494.28274 | 9  |
| 6          | 715.41377      | 358.21052      | L    | 873.51528  | 437.26128 | 8  |
| 7          | 828.49784      | 414.75296      | L    | 760.43121  | 380.71924 | 7  |
| 8          | 915.52987      | 458.26857      | S    | 647.34714  | 324.17721 | 6  |
| 9          | 1014.59829     | 507.80278      | V    | 560.31511  | 280.66119 | 5  |
| 10         | 1101.63032     | 551.31880      | S    | 461.24689  | 231.12698 | 4  |
| 11         | 1229.68890     | 615.34809      | Q    | 374.21466  | 187.61097 | 3  |
| 12         | 1300.72602     | 650.86685      | A    | 246.15608  | 123.58168 | 2  |

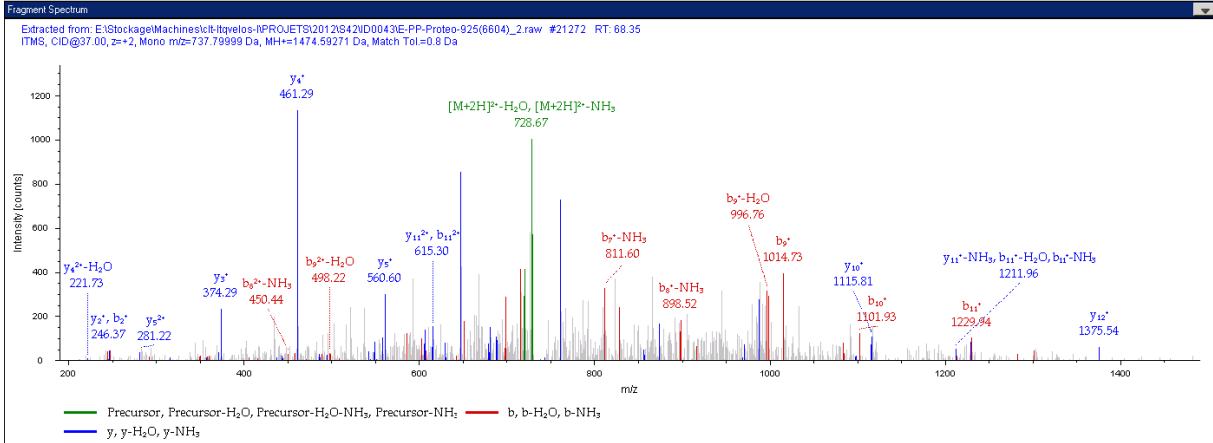

# Protein references (1):

- Cirhin OS=Homo sapiens GN=CIRH1A PE=1 SV=1 - [CIR1A\_HUMAN]

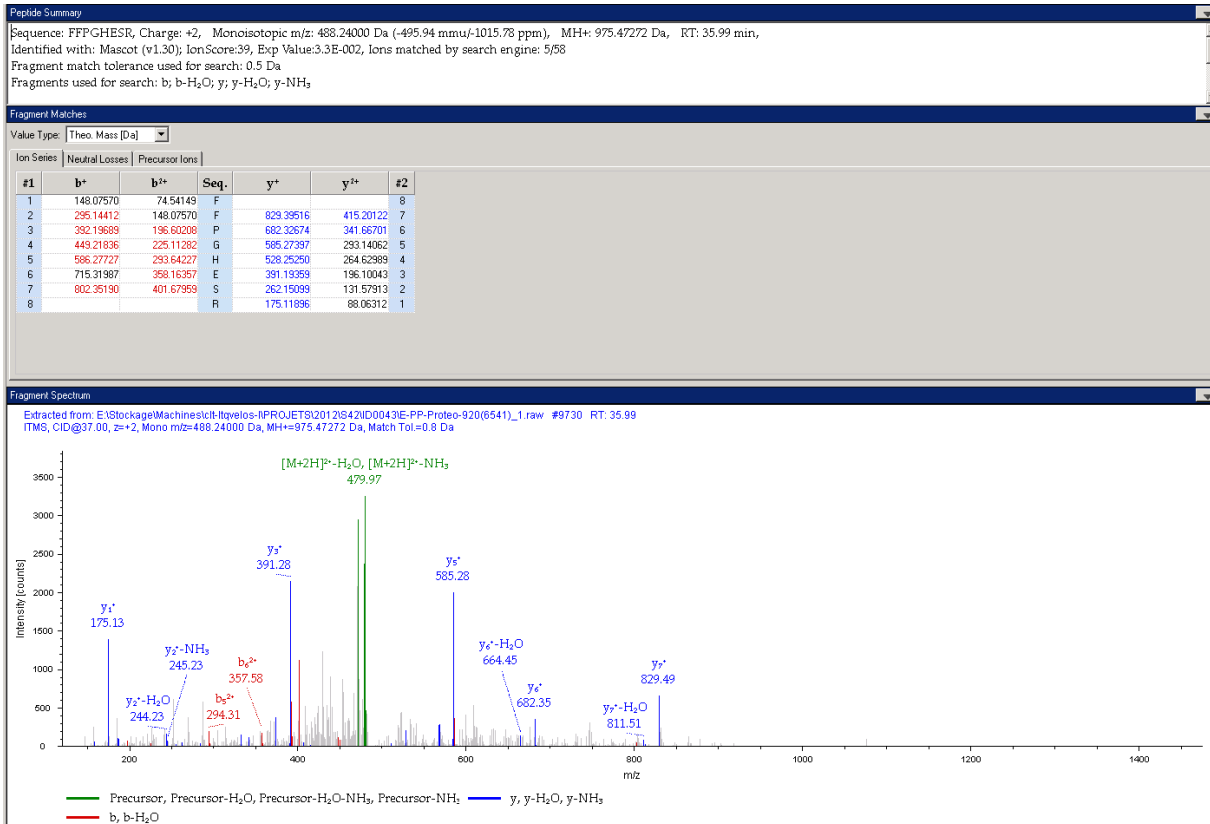

Protein references (1):

- Hydroxyacylglutathione hydrolase, mitochondrial OS=Homo sapiens GN=HAGH PE=1 SV=2 - [GLO2\_HUMAN]

Peptide Summary

Sequence: ALLEVLGR, Charge: +2, Monoisotopic m/z: 435.72000 Da (-54.09 mmu/-124.14 ppm), MH+: 870.43272 Da, RT: 56.10 min, Identified with: Mascot (v1.30); IonScore:40, Exp Value:2.3E-002, Ions matched by search engine: 9/56  
 Fragment match tolerance used for search: 0.5 Da  
 Fragments used for search: b; b-H<sub>2</sub>O; y; y-H<sub>2</sub>O; y-NH<sub>3</sub>

Fragment Matches

Value Type: Theo. Mass [Da]

| Ion Series | Neutral Losses | Precursor Ions |      |                |                |    |
|------------|----------------|----------------|------|----------------|----------------|----|
| #1         | b <sup>+</sup> | b <sup>+</sup> | Seq. | y <sup>+</sup> | y <sup>+</sup> | #2 |
| 1          | 72.04440       | 36.52584       | A    |                |                | 8  |
| 2          | 185.12847      | 93.06787       | L    | 799.50366      | 400.25547      | 7  |
| 3          | 298.21254      | 149.60991      | L    | 686.41959      | 343.71343      | 6  |
| 4          | 427.25514      | 214.13121      | E    | 573.33552      | 287.17140      | 5  |
| 5          | 526.32356      | 263.66542      | V    | 444.23292      | 222.65010      | 4  |
| 6          | 639.40763      | 320.20745      | L    | 345.22450      | 173.11589      | 3  |
| 7          | 696.42910      | 348.71819      | G    | 232.14043      | 116.57385      | 2  |
| 8          |                |                | R    | 175.11896      | 88.06312       | 1  |

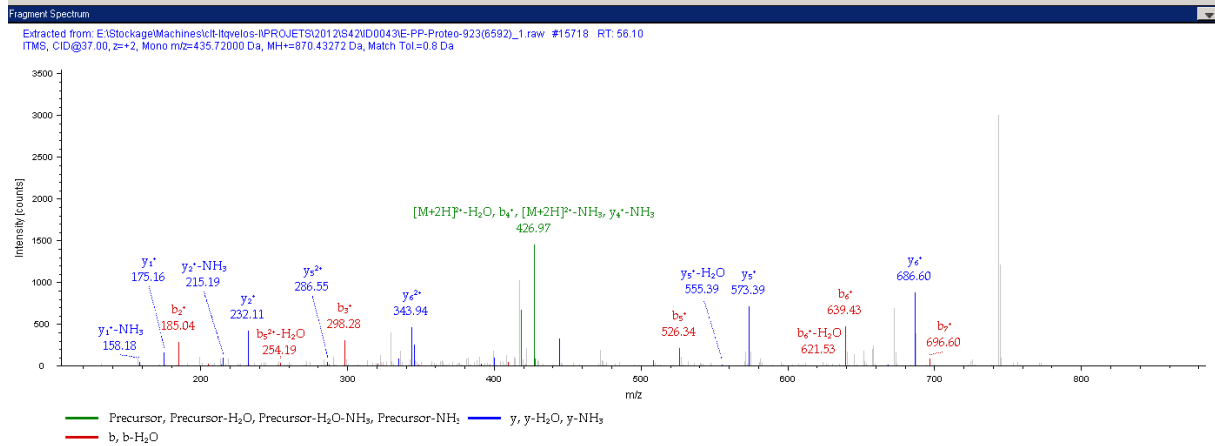

Protein references (1):

- 3-hydroxyisobutyrate dehydrogenase, mitochondrial OS=Homo sapiens GN=HIBADH PE=1 SV=2 - [3HIDH\_HUMAN]

Peptide Summary

Sequence: GSLLIDSSSTIDPAVSK, Charge: +2, Monoisotopic m/z: 801.95999 Da (+27.08 mmu/+33.77 ppm), MH+: 1602.91271 Da, RT: 54.86 min, Identified with: Mascot (v1.30); IonScore:41, Exp Value:1.8E-002, Ions matched by search engine: 6/146  
 Fragment match tolerance used for search: 0.5 Da  
 Fragments used for search: b; b-H<sub>2</sub>O; y; y-H<sub>2</sub>O; y-NH<sub>3</sub>

Fragment Matches

Value Type: Theo. Mass [Da]

| #1 | Neutral Losses |                 | Seq. | y <sup>+</sup> | y <sup>2+</sup> | #2 |
|----|----------------|-----------------|------|----------------|-----------------|----|
|    | b <sup>+</sup> | b <sup>2+</sup> |      |                |                 |    |
| 1  | 58.02875       | 29.51801        | G    |                |                 | 16 |
| 2  | 145.06078      | 73.03403        | S    | 1545.83710     | 773.42219       | 15 |
| 3  | 259.14485      | 129.57606       | L    | 1459.80507     | 729.90617       | 14 |
| 4  | 371.22892      | 186.11810       | L    | 1345.72100     | 673.36414       | 13 |
| 5  | 484.31299      | 242.66013       | I    | 1232.63893     | 616.82210       | 12 |
| 6  | 599.33994      | 300.17361       | D    | 1119.55286     | 560.28007       | 11 |
| 7  | 686.37197      | 343.68962       | S    | 1004.52591     | 502.76659       | 10 |
| 8  | 773.40400      | 387.20564       | S    | 917.49388      | 459.25058       | 9  |
| 9  | 874.45168      | 437.72948       | T    | 830.46185      | 415.73456       | 8  |
| 10 | 987.53575      | 494.27151       | I    | 729.41417      | 365.21072       | 7  |
| 11 | 1102.56270     | 551.78499       | D    | 616.33010      | 308.66869       | 6  |
| 12 | 1199.61547     | 600.31137       | P    | 501.30315      | 251.15521       | 5  |
| 13 | 1270.65359     | 635.92993       | A    | 404.25038      | 202.62893       | 4  |
| 14 | 1369.72101     | 685.36414       | V    | 333.21326      | 167.11027       | 3  |
| 15 | 1456.75304     | 728.88016       | S    | 234.14484      | 117.57606       | 2  |
| 16 |                |                 | K    | 147.11281      | 74.06004        | 1  |

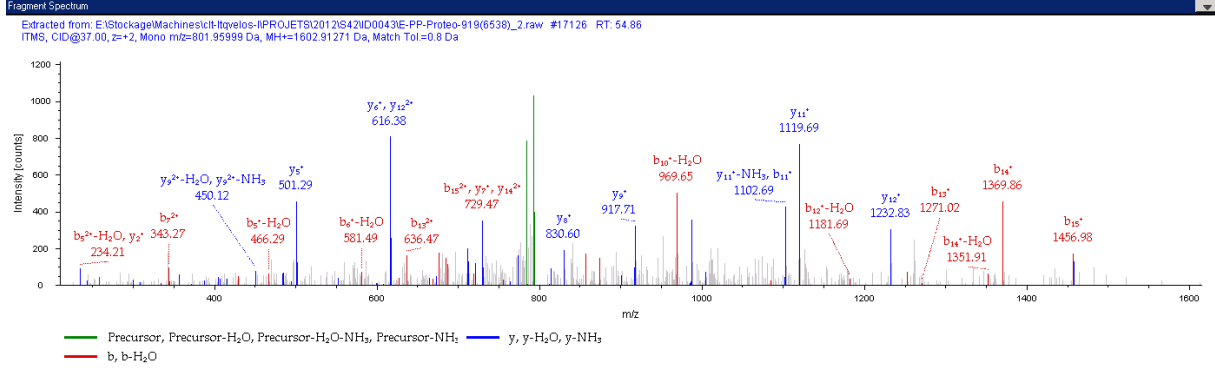



Protein references (1):

- S-formylglutathione hydrolase OS=Homo sapiens GN=ESD PE=1 SV=2 - [ESTD\_HUMAN]

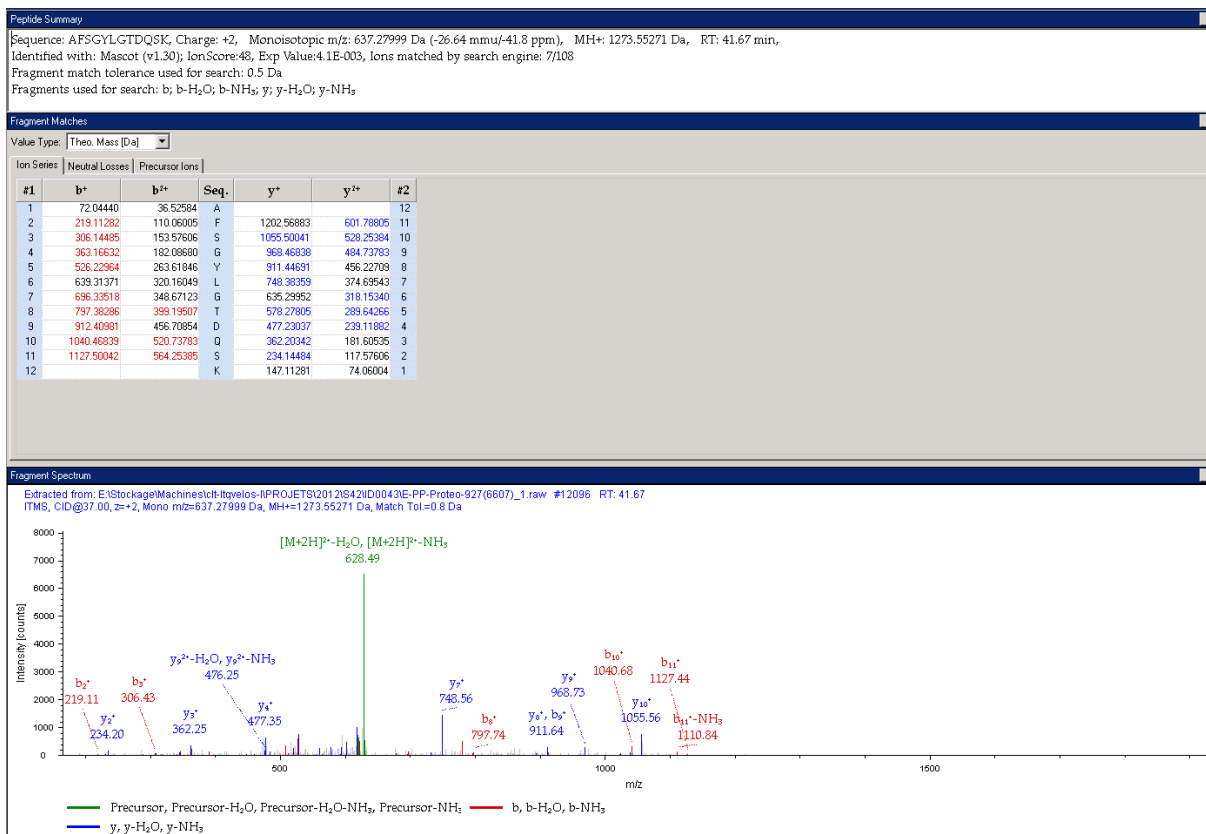

Protein references (1):

- Cathepsin D OS=Homo sapiens GN=CTSD PE=1 SV=1 - [CATD\_HUMAN]

Peptide Summary  
 Sequence: VGFAEAAK, Charge: +2, Monoisotopic m/z: 411.24000 Da (+521.38 mmu/+1267.83 ppm), MH+: 821.47272 Da, RT: 32.77 min,  
 Identified with: Mascot (v1.30); IonScore:43, Exp Value:1.1E-002, Ions matched by search engine: 6/6  
 Fragment match tolerance used for search: 0.5 Da  
 Fragments used for search: b; b-H<sub>2</sub>O; y; y-H<sub>2</sub>O; y-NH<sub>3</sub>

Fragment Matches  
 Value Type: Theo. Mass [Da]

| Ion Series | Neutral Losses | Precursor Ions                                       |
|------------|----------------|------------------------------------------------------|
| #1         | b <sup>+</sup> | b <sup>+</sup> Seq. y <sup>+</sup> y <sup>+</sup> #2 |
| 1          | 100.07570      | 50.54149 V 721.36281 361.18504 8                     |
| 2          | 157.09717      | 79.05222 G 664.34134 332.67431 7                     |
| 3          | 304.16559      | 152.58643 F 517.27292 259.14010 6                    |
| 4          | 375.20271      | 188.10499 A 446.23680 223.62154 5                    |
| 5          | 504.24531      | 252.62629 E 317.19320 159.10024 4                    |
| 6          | 575.28243      | 288.14485 A 246.15608 123.59168 3                    |
| 7          | 646.31955      | 323.66341 A 175.11896 88.06312 2                     |
| 8          |                | R                                                    |

Fragment Spectrum  
 Extracted from: E:\Storage\Machines\ct-l\lavelos-IPROJETS\2012\642\ID0043E-PP-Proteo-923(6592)\_2.raw #7782 RT: 32.77  
 IMS, CID@37.00, z=+2, Mono m/z=411.24000 Da, MH+=821.47272 Da, Match Tol=0.8 Da

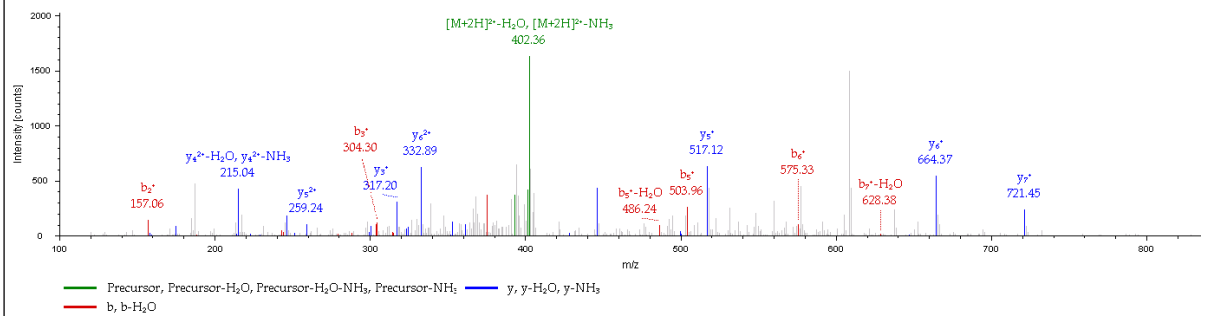

Protein references (1):

- ES1 protein homolog, mitochondrial OS=Homo sapiens GN=C21orf33 PE=1 SV=3 - [ES1\_HUMAN]

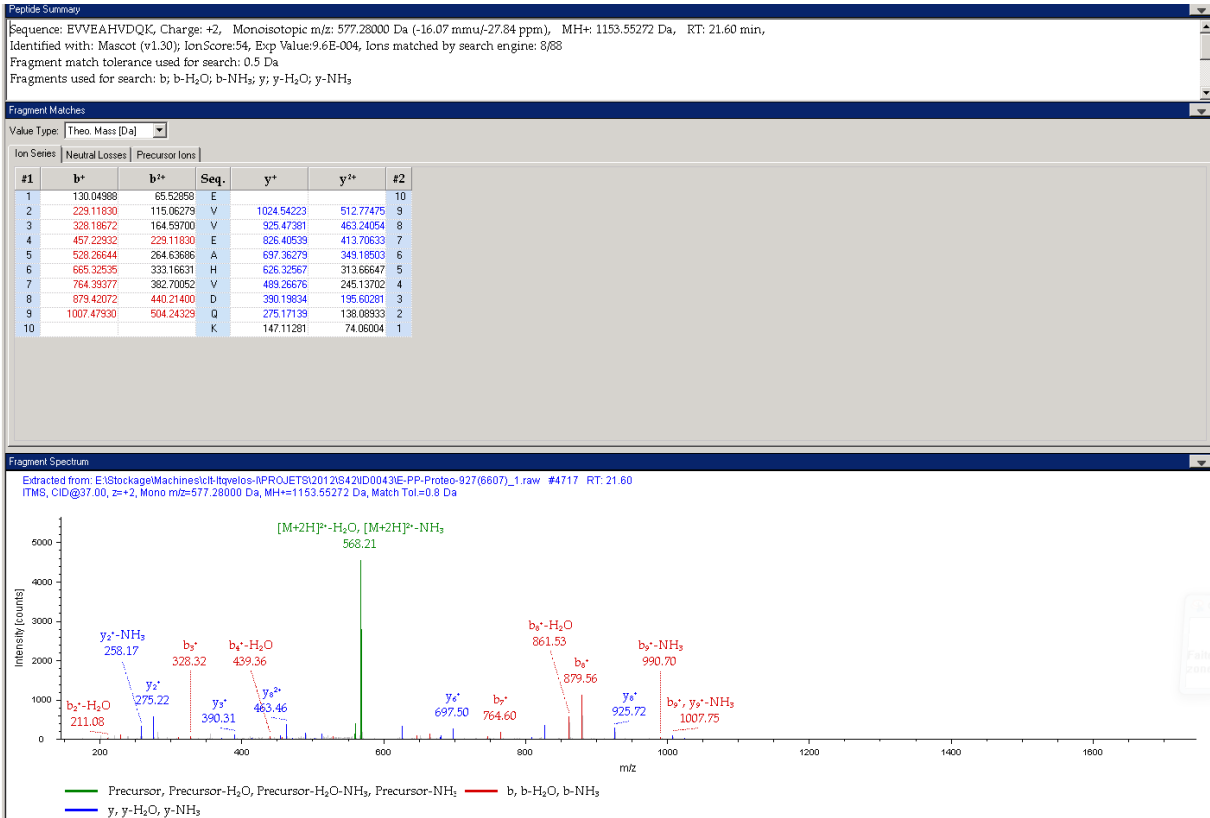

Protein references (1):

- cAMP-dependent protein kinase type II-alpha regulatory subunit OS=Homo sapiens GN=PRKAR2A PE=1 SV=2 - [KAP2\_HUMAN]

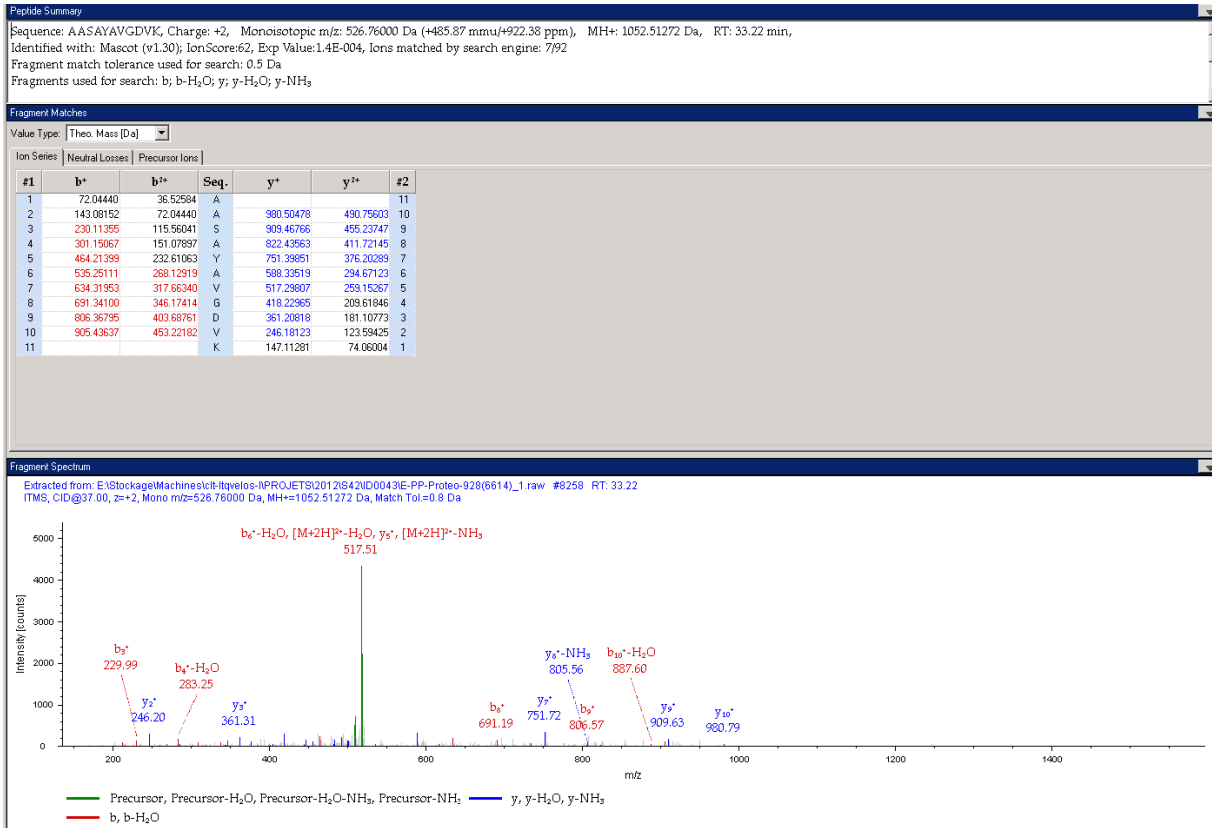

Protein references (1):

- L-xylulose reductase OS=Homo sapiens GN=DCXR PE=1 SV=2 - [DCXR\_HUMAN]

Peptide Summary

Sequence: GTVQALHATGAR, Charge: +2, Monoisotopic m/z: 591.28000 Da (-42.98 mmu/-72.69 ppm), MH+: 1181.55271 Da, RT: 25.31 min, Identified with: Mascot (v1.30); IonScore:38, Exp Value:3.5E-002, Ions matched by search engine: 8/118  
 Fragment match tolerance used for search: 0.5 Da  
 Fragments used for search: b; b-H<sub>2</sub>O; b-NH<sub>3</sub>; y; y-H<sub>2</sub>O; y-NH<sub>3</sub>

Fragment Matches

Value Type: Theo. Mass [Da]

| Ion Series | Neutral Losses | Precursor Ions |      |            |           |    |
|------------|----------------|----------------|------|------------|-----------|----|
| #1         | b*             | b**            | Seq. | y*         | y**       | #2 |
| 1          | 58.02875       | 29.51801       | G    |            |           | 12 |
| 2          | 159.07643      | 80.04185       | T    | 1124.61713 | 562.81220 | 11 |
| 3          | 298.14485      | 129.57806      | V    | 1023.95945 | 512.28636 | 10 |
| 4          | 386.20343      | 193.60536      | Q    | 924.50103  | 462.75415 | 9  |
| 5          | 457.24855      | 229.12391      | A    | 796.44245  | 398.72496 | 8  |
| 6          | 570.32462      | 285.66595      | L    | 725.40533  | 363.20630 | 7  |
| 7          | 707.38353      | 354.19540      | H    | 612.32126  | 306.66427 | 6  |
| 8          | 778.42065      | 389.71396      | A    | 475.26235  | 238.13481 | 5  |
| 9          | 879.46833      | 440.23780      | T    | 404.22523  | 202.61625 | 4  |
| 10         | 936.49980      | 468.74854      | G    | 303.17755  | 152.09241 | 3  |
| 11         | 1007.52632     | 504.26710      | A    | 246.15608  | 123.58168 | 2  |
| 12         |                |                | R    | 175.11896  | 88.06312  | 1  |

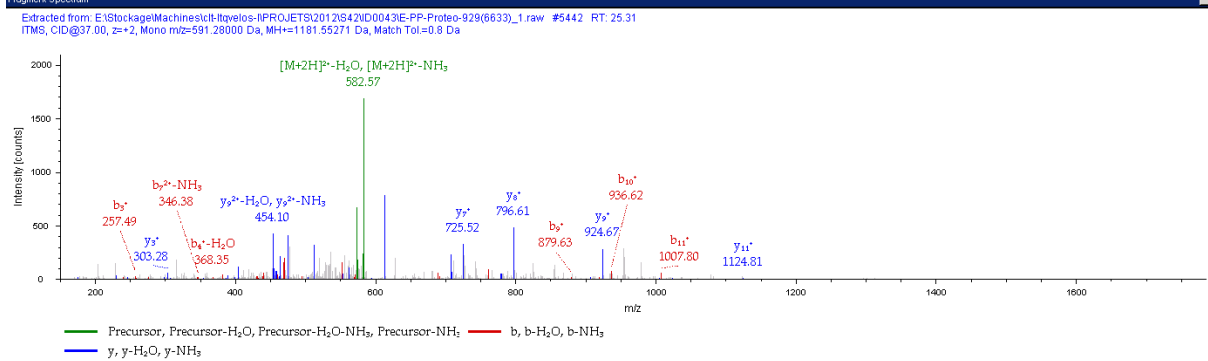

## Protein references (2):

- Eukaryotic initiation factor 4A-I OS=Homo sapiens GN=EIF4A1 PE=1 SV=1 - [IF4A1\_HUMAN]

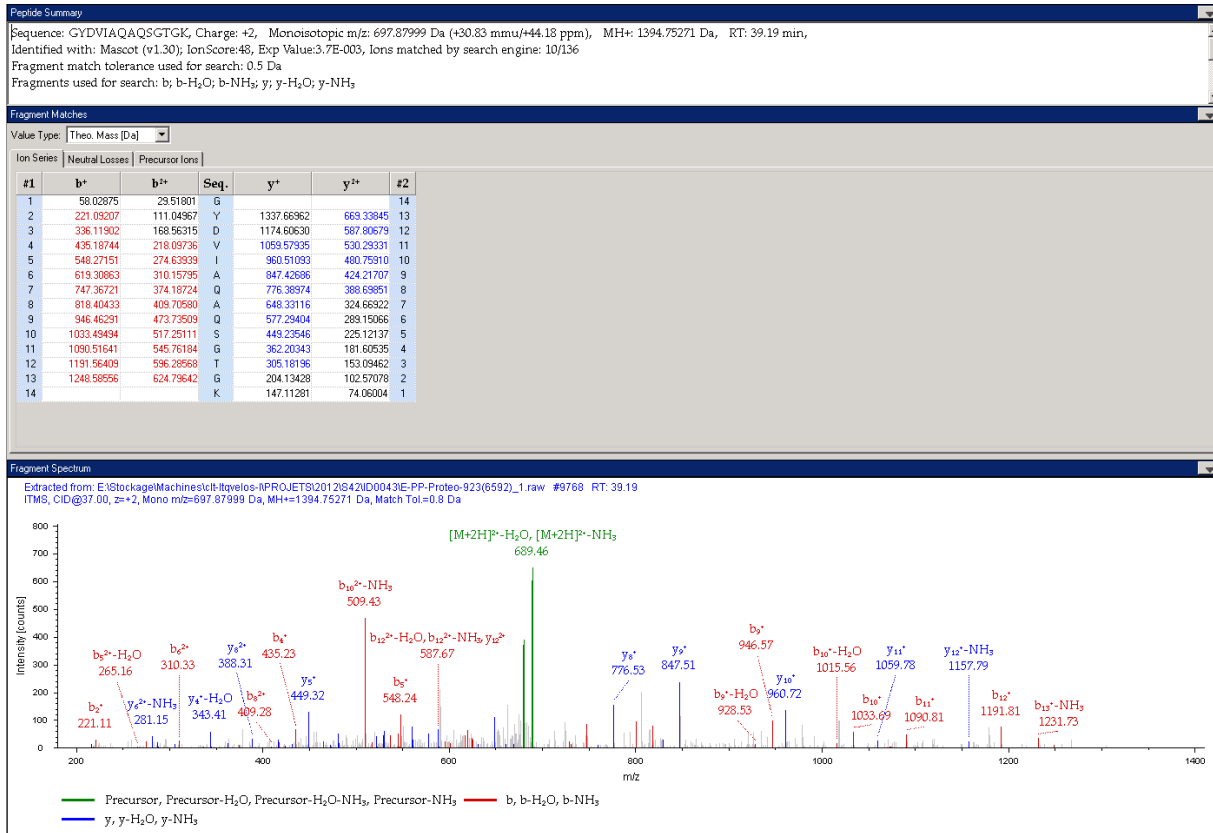

## Protein references (1):

- Band 4.1-like protein 3 OS=Homo sapiens GN=EPB41L3 PE=1 SV=2 - [E41L3\_HUMAN]

Peptide Summary

Sequence: SSSSKLSR, Charge: +2, Monoisotopic m/z: 426.24000 Da (+7.29 mmu/+17.11 ppm), MH+: 851.47272 Da, RT: 32.74 min, Identified with: Mascot (v1.30); IonScore:38, Exp Value:3.1E-002, Ions matched by search engine: 6/74  
 Fragment match tolerance used for search: 0.5 Da  
 Fragments used for search: b; b-H<sub>2</sub>O; b-NH<sub>3</sub>; y; y-H<sub>2</sub>O; y-NH<sub>3</sub>

Fragment Matches

Value Type: Theo. Mass [Da]

| #1 | Neutral Losses |                | Seq. | Precursor Ions |                | #2 |
|----|----------------|----------------|------|----------------|----------------|----|
|    | b*             | b <sup>+</sup> |      | y*             | y <sup>+</sup> |    |
| 1  | 88.0331        | 44.52329       | S    |                |                | 8  |
| 2  | 175.07134      | 88.0331        | S    | 764.42612      | 382.71670      | 7  |
| 3  | 262.10337      | 131.55532      | S    | 677.39409      | 339.20688      | 6  |
| 4  | 349.13540      | 175.07134      | S    | 590.36206      | 295.68467      | 5  |
| 5  | 477.23037      | 239.11882      | K    | 503.33003      | 252.16885      | 4  |
| 6  | 590.31444      | 295.66086      | L    | 375.23506      | 188.12117      | 3  |
| 7  | 677.34647      | 339.17687      | S    | 262.15099      | 131.57913      | 2  |
| 8  |                |                | R    | 175.11896      | 88.06312       | 1  |

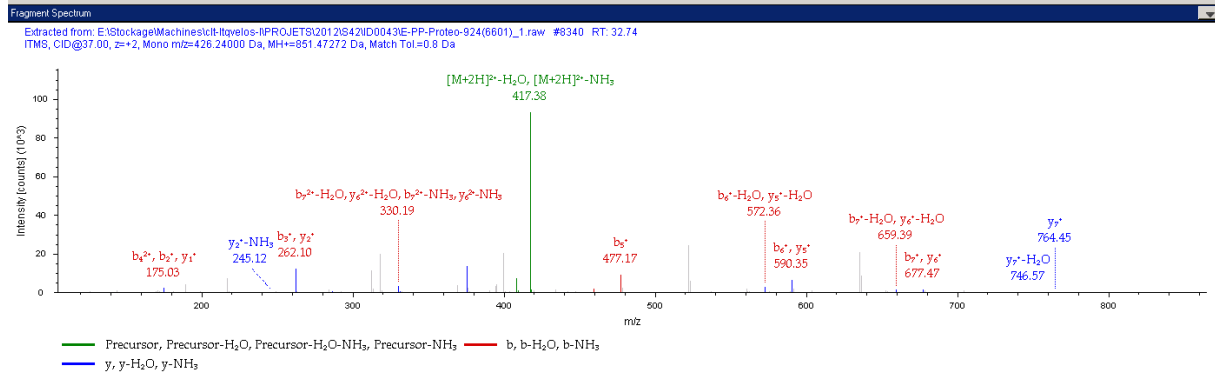

Protein references (1):

- Ubiquitin carboxyl-terminal hydrolase 14 OS=Homo sapiens GN=USP14 PE=1 SV=3 - [UBP14\_HUMAN]

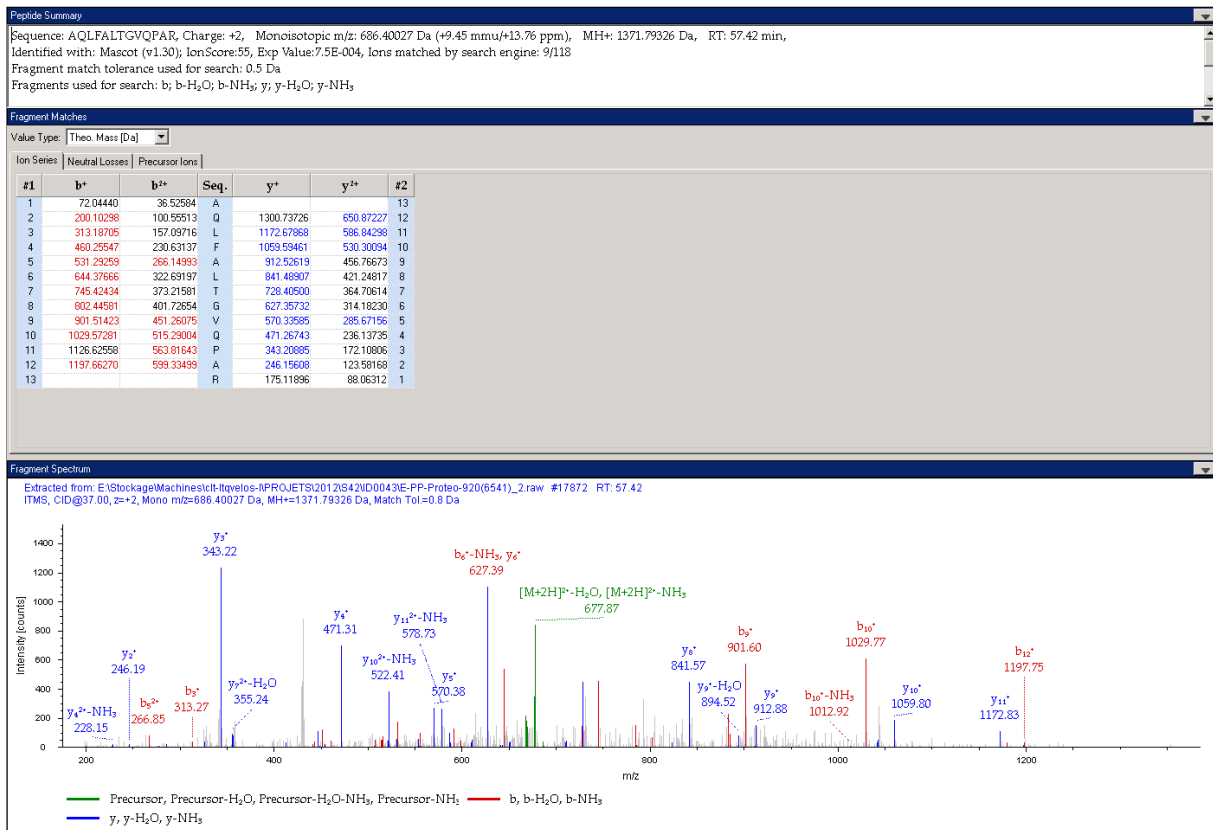



Protein references (14):

- Histone H2B type 1-K OS=Homo sapiens GN=HIST1H2BK PE=1 SV=3 - [H2B1K\_HUMAN]
- Histone H2B type 1-J OS=Homo sapiens GN=HIST1H2BJ PE=1 SV=3 - [H2B1J\_HUMAN]

Peptide Summary

Sequence: AMGIMNSFVNDIFER, M2-Oxidation (15.99492 Da)  
 Charge: +2, Monoisotopic m/z: 880.47999 Da (+69.24 mmu/+78.64 ppm), MH+: 1759.95270 Da, RT: 78.54 min,  
 Identified with: Mascot (v1.30); IonScore:69, Exp Value:2.8E-005, Ions matched by search engine: 11/144  
 Fragment match tolerance used for search: 0.5 Da

Fragment Matches

Value Type: Theo. Mass [Da]

| Ion Series | Neutral Losses | Precursor Ions |             |            |           |    |
|------------|----------------|----------------|-------------|------------|-----------|----|
| #1         | b*             | b**            | Seq.        | y*         | y**       | #2 |
| 1          | 72.04440       | 36.52584       | A           |            |           | 15 |
| 2          | 219.07981      | 110.04354      | M-Oxidation | 1688.77719 | 844.83223 | 14 |
| 3          | 276.10128      | 138.55428      | G           | 1541.74177 | 771.37452 | 13 |
| 4          | 389.18535      | 195.09631      | I           | 1484.72030 | 742.86379 | 12 |
| 5          | 520.22595      | 260.61656      | M           | 1371.63623 | 686.32175 | 11 |
| 6          | 634.26878      | 317.63803      | N           | 1240.59573 | 620.90150 | 10 |
| 7          | 721.30081      | 361.15404      | S           | 1126.95280 | 563.78004 | 9  |
| 8          | 868.36823      | 434.68825      | F           | 1039.52077 | 520.26402 | 8  |
| 9          | 967.43785      | 484.22246      | V           | 892.45235  | 446.72981 | 7  |
| 10         | 1081.48058     | 541.24393      | N           | 793.38383  | 397.19560 | 6  |
| 11         | 1196.50753     | 598.75740      | D           | 679.34100  | 340.17414 | 5  |
| 12         | 1309.59160     | 655.29844      | I           | 564.31405  | 282.66066 | 4  |
| 13         | 1456.66002     | 728.83365      | F           | 451.22980  | 226.11863 | 3  |
| 14         | 1585.70262     | 793.35495      | E           | 304.16156  | 152.58442 | 2  |
| 15         |                |                | R           | 175.11896  | 88.06312  | 1  |

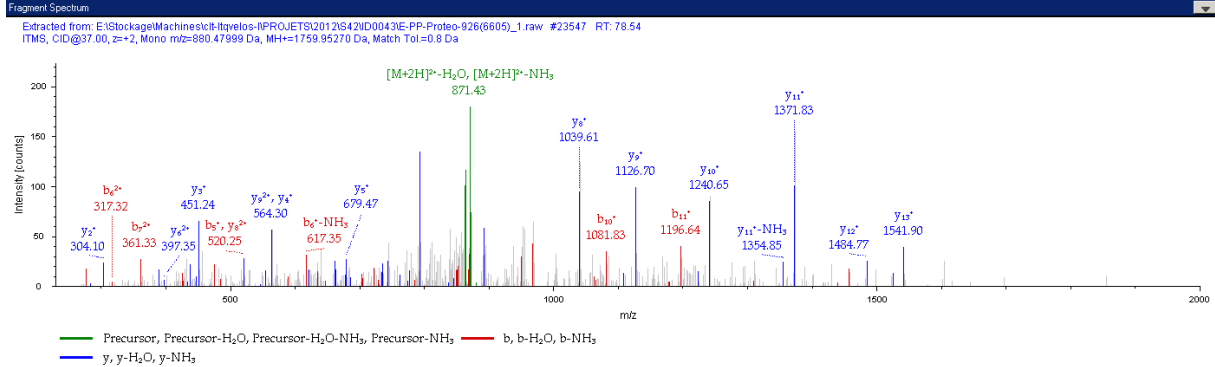

Protein references (1):

- Superoxide dismutase [Cu-Zn] OS=Homo sapiens GN=SOD1 PE=1 SV=2 - [SODC\_HUMAN]

Peptide Summary

Sequence: GDGPVQGIINFEQK, Charge: +2, Monoisotopic m/z: 751.45007 Da (+64.17 mmu/+85.4 ppm), MH+: 1501.89287 Da, RT: 56.52 min, Identified with: Mascot (v1.30) IonScore:49, Exp Value:2.8E-003, Ions matched by search engine: 8/140  
 Fragment match tolerance used for search: 0.5 Da  
 Fragments used for search: b; b-H<sub>2</sub>O; b-NH<sub>3</sub>; y; y-H<sub>2</sub>O; y-NH<sub>3</sub>

Fragment Matches

Value Type: Theo. Mass [Da]

| Ion Series | Neutral Losses | Precursor Ions | #1         | b* | b <sup>+</sup> | Seq. | y*         | y <sup>+</sup> | #2 |
|------------|----------------|----------------|------------|----|----------------|------|------------|----------------|----|
| 1          |                |                | 58.02875   |    | 29.51901       | G    |            |                | 14 |
| 2          |                |                | 173.05570  |    | 87.03149       | D    | 1444.74314 | 722.87521      | 13 |
| 3          |                |                | 230.07717  |    | 115.54222      | G    | 1329.71619 | 665.36173      | 12 |
| 4          |                |                | 327.12994  |    | 164.06861      | P    | 1272.69472 | 636.85100      | 11 |
| 5          |                |                | 426.19836  |    | 213.60282      | V    | 1175.64195 | 588.32461      | 10 |
| 6          |                |                | 554.25694  |    | 277.63211      | Q    | 1076.57353 | 538.79040      | 9  |
| 7          |                |                | 611.27841  |    | 306.14284      | G    | 948.51495  | 474.76111      | 8  |
| 8          |                |                | 724.36248  |    | 362.69488      | I    | 891.49348  | 446.25038      | 7  |
| 9          |                |                | 837.44655  |    | 419.22691      | I    | 778.40941  | 389.70634      | 6  |
| 10         |                |                | 961.49949  |    | 476.24638      | N    | 665.32534  | 333.16631      | 5  |
| 11         |                |                | 1098.55790 |    | 549.78259      | F    | 551.28241  | 276.14494      | 4  |
| 12         |                |                | 1227.60650 |    | 614.30389      | E    | 404.21399  | 202.61063      | 3  |
| 13         |                |                | 1355.65908 |    | 678.33318      | Q    | 275.17139  | 138.08933      | 2  |
| 14         |                |                |            |    |                | K    | 147.11281  | 74.06004       | 1  |

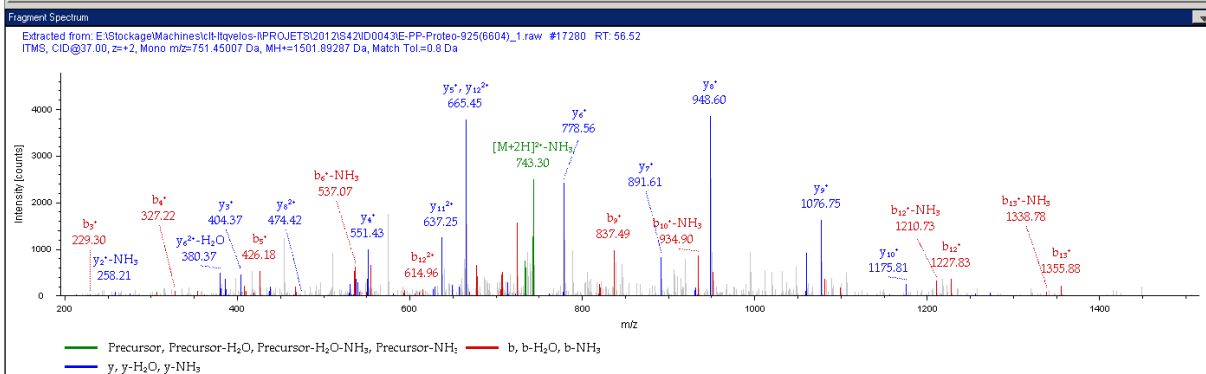

Protein references (3):

- Ig heavy chain V-I region EU OS=Homo sapiens PE=1 SV=1 - [HV101\_HUMAN]
- Ig heavy chain V-I region SIF OS=Homo sapiens PE=1 SV=1 - [HV106\_HUMAN]

Peptide Summary

Sequence: QVQLVQSGAEVYK, Charge: +2, Monoisotopic m/z: 643.31999 Da (-39.23 mmu/-60.97 ppm), MH+: 1285.63271 Da, RT: 37.08 min, Identified with: Mascot (v1.30), IonScore:48, Exp Value:3.5E-003, Ions matched by search engine: 9/116, Fragment match tolerance used for search: 0.5 Da, Fragments used for search: b; b-H<sub>2</sub>O; b-NH<sub>3</sub>; y; y-H<sub>2</sub>O; y-NH<sub>3</sub>

Fragment Matches

Value Type: Theo. Mass [Da]

| Ion Series | Neutral Losses | Precursor Ions |      |            |           |    |
|------------|----------------|----------------|------|------------|-----------|----|
| #1         | b*             | b**            | Seq. | y*         | y**       | #2 |
| 1          | 129.06586      | 65.03657       | Q    |            |           | 12 |
| 2          | 228.13428      | 114.57078      | V    | 1157.65252 | 579.32990 | 11 |
| 3          | 356.15286      | 178.60007      | Q    | 1058.58410 | 529.79563 | 10 |
| 4          | 453.27833      | 235.14210      | L    | 930.52552  | 465.76640 | 9  |
| 5          | 568.34535      | 284.67631      | V    | 817.44145  | 409.22436 | 8  |
| 6          | 696.40393      | 348.70560      | Q    | 718.37303  | 359.69015 | 7  |
| 7          | 783.43596      | 392.22162      | S    | 590.31445  | 295.66086 | 6  |
| 8          | 840.45743      | 420.73235      | G    | 503.28242  | 252.14485 | 5  |
| 9          | 911.49455      | 456.25091      | A    | 446.26095  | 223.63411 | 4  |
| 10         | 1040.53715     | 520.77221      | E    | 375.22383  | 188.11555 | 3  |
| 11         | 1139.60557     | 570.30642      | V    | 246.18123  | 123.59425 | 2  |
| 12         |                |                | K    | 147.11281  | 74.06004  | 1  |

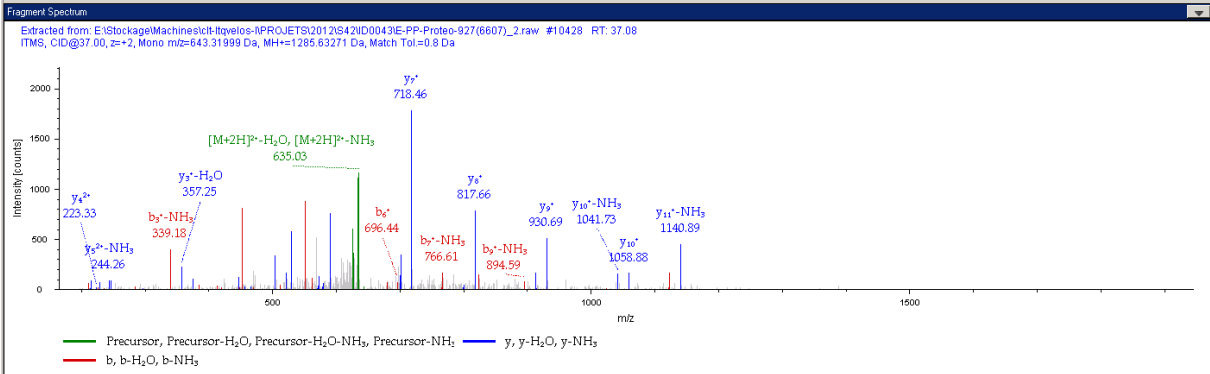

Protein references (1):

- Ig heavy chain V-III region GAL OS=Homo sapiens PE=1 SV=1 - [HV320\_HUMAN]

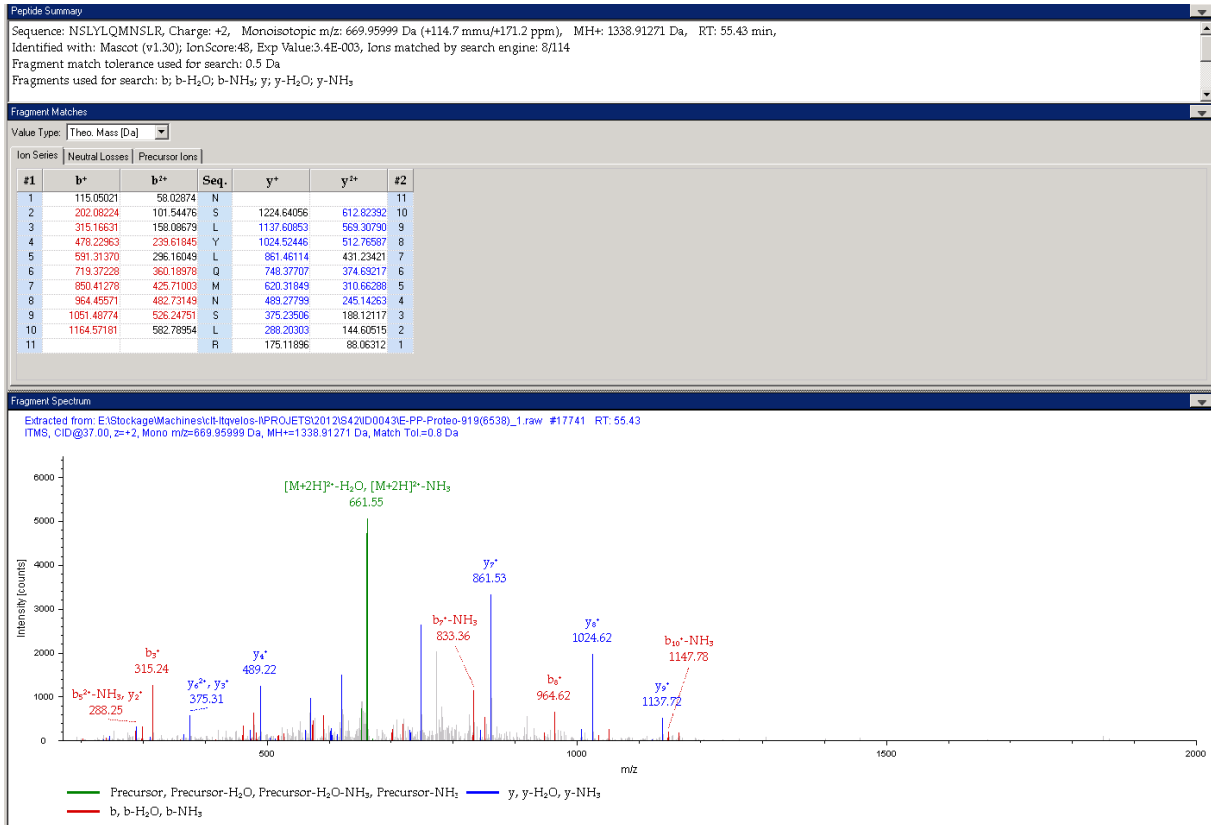

Protein references (1):

- Ig delta chain C region OS=Homo sapiens GN=IGHD PE=1 SV=2 - [IGHD\_HUMAN]

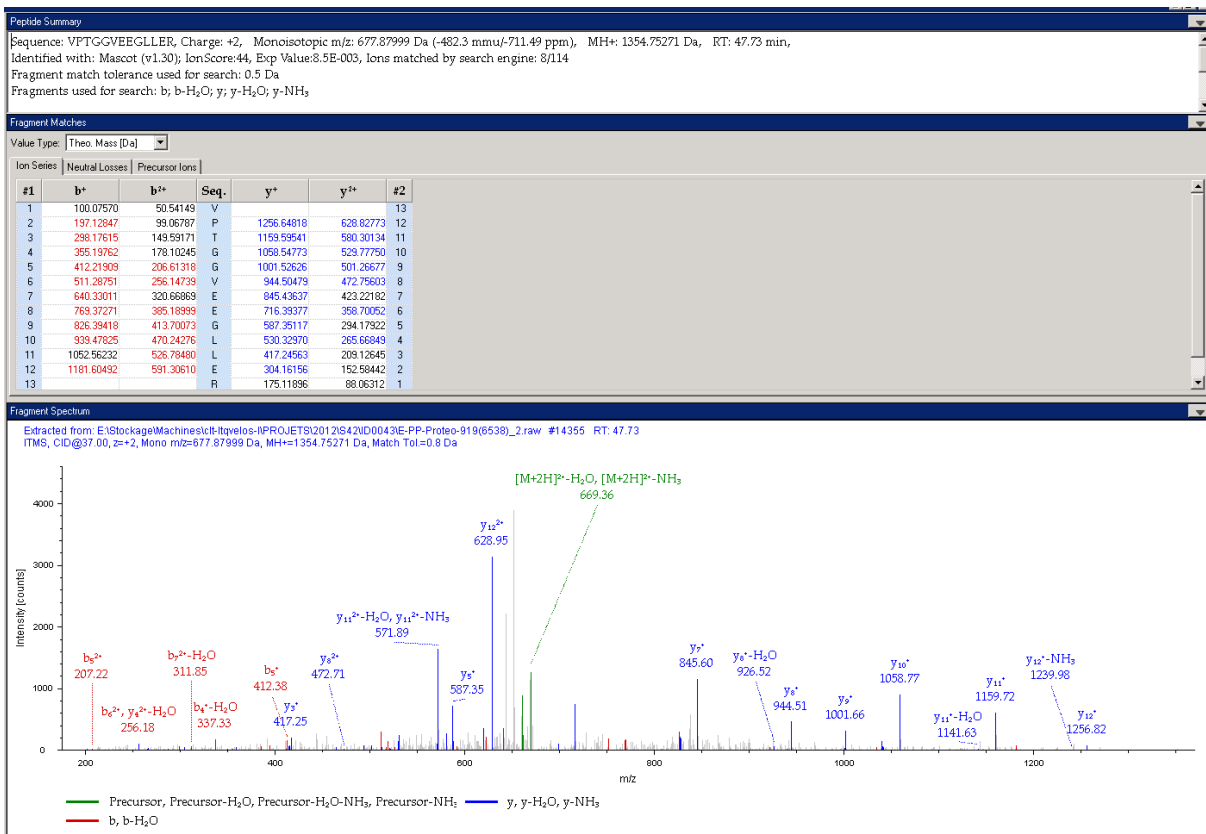

## Protein references (1):

- Alpha-2-HS-glycoprotein OS=Homo sapiens GN=AHSG PE=1 SV=1 - [FETUA\_HUMAN]

Peptide Summary

Sequence: HTLNQIDEVK, Charge: +2, Monoisotopic m/z: 598.80000 Da (-17.17 mmu/-28.67 ppm), MH+: 1196.59271 Da, RT: 30.82 min, Identified with: Mascot (v1.30); IonScore:55, Exp Value:6.9E-004, Ions matched by search engine: 7/96  
 Fragment match tolerance used for search: 0.5 Da  
 Fragments used for search: b; b-H<sub>2</sub>O; b-NH<sub>3</sub>; y; y-H<sub>2</sub>O; y-NH<sub>3</sub>

Fragment Matches

Value Type: Theo. Mass [Da]

| Ion Series | Neutral Losses | Precursor Ions |      |                |                |    |
|------------|----------------|----------------|------|----------------|----------------|----|
| #1         | b <sup>+</sup> | b <sup>+</sup> | Seq. | y <sup>+</sup> | y <sup>+</sup> | #2 |
| 1          | 138.06619      | 69.53673       | H    |                |                | 10 |
| 2          | 239.11387      | 120.06057      | T    | 1059.56811     | 530.28769      | 9  |
| 3          | 352.19794      | 176.60261      | L    | 958.52043      | 479.76385      | 8  |
| 4          | 466.24087      | 233.62407      | N    | 845.43636      | 423.22182      | 7  |
| 5          | 594.29945      | 297.65336      | Q    | 731.39343      | 366.20035      | 6  |
| 6          | 707.38352      | 354.19540      | I    | 603.33485      | 302.17106      | 5  |
| 7          | 822.41047      | 411.70887      | D    | 490.25078      | 245.62863      | 4  |
| 8          | 951.45307      | 476.23017      | E    | 375.22383      | 188.11555      | 3  |
| 9          | 1050.52149     | 525.76438      | V    | 246.18123      | 123.59425      | 2  |
| 10         |                |                | K    | 147.11281      | 74.06004       | 1  |

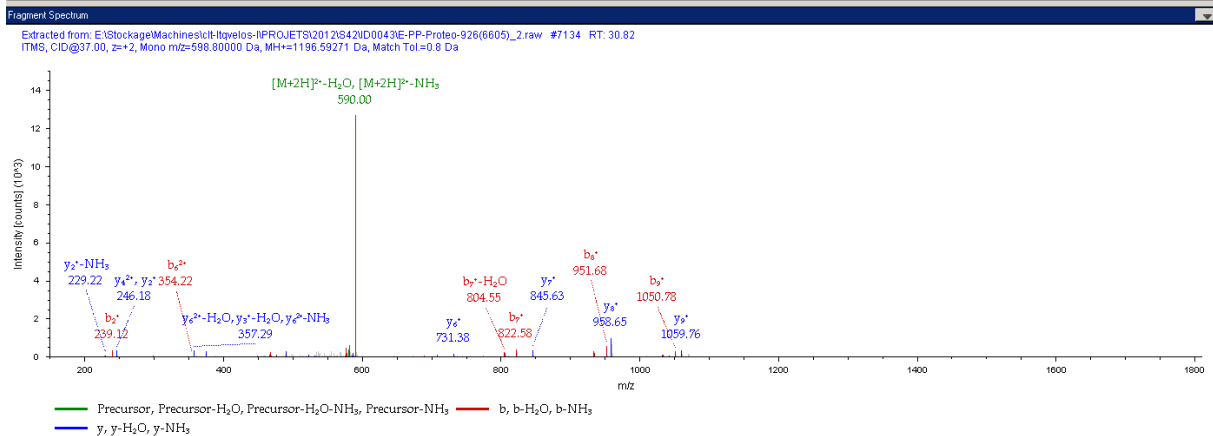

## Protein references (1):

- Transthyretin OS=Homo sapiens GN=TTR PE=1 SV=1 - [TTHY\_HUMAN]

Peptide Summary

Sequence: AADDTWEPFASGK, Charge: +2, Monoisotopic m/z: 697.83999 Da (+25.19 mmu/+36.1 ppm), MH+: 1394.67271 Da, RT: 52.75 min, Identified with: Mascot (v1.30); IonScore:53, Exp Value:1.2E-003, Ions matched by search engine: 8/112  
 Fragment match tolerance used for search: 0.5 Da  
 Fragments used for search: b; b-H<sub>2</sub>O; y; y-H<sub>2</sub>O; y-NH<sub>3</sub>

Fragment Matches

Value Type: Theo. Mass [Da]

| Ion Series | Neutral Losses | Precursor Ions |      |            |                |    |
|------------|----------------|----------------|------|------------|----------------|----|
| #1         | b*             | b <sup>+</sup> | Seq. | y*         | y <sup>+</sup> | #2 |
| 1          | 72.04440       | 36.52684       | A    |            |                | 13 |
| 2          | 143.08152      | 72.04440       | A    | 1323.58524 | 662.29626      | 12 |
| 3          | 258.10847      | 129.95787      | D    | 1252.54812 | 626.77770      | 11 |
| 4          | 373.13542      | 187.07135      | D    | 1137.52117 | 569.26422      | 10 |
| 5          | 474.18310      | 237.59519      | T    | 1022.49422 | 511.75075      | 9  |
| 6          | 660.26242      | 330.63486      | W    | 921.44654  | 461.22691      | 8  |
| 7          | 789.30502      | 395.15615      | E    | 735.36722  | 368.18725      | 7  |
| 8          | 986.35779      | 443.68253      | P    | 606.32462  | 303.65995      | 6  |
| 9          | 1033.42521     | 517.21674      | F    | 509.27105  | 255.13956      | 5  |
| 10         | 1104.46333     | 552.73530      | A    | 362.20343  | 181.60535      | 4  |
| 11         | 1191.49536     | 596.25132      | S    | 291.16631  | 146.08679      | 3  |
| 12         | 1248.51693     | 624.76205      | G    | 204.13428  | 102.57078      | 2  |
| 13         |                |                | K    | 147.11281  | 74.06004       | 1  |

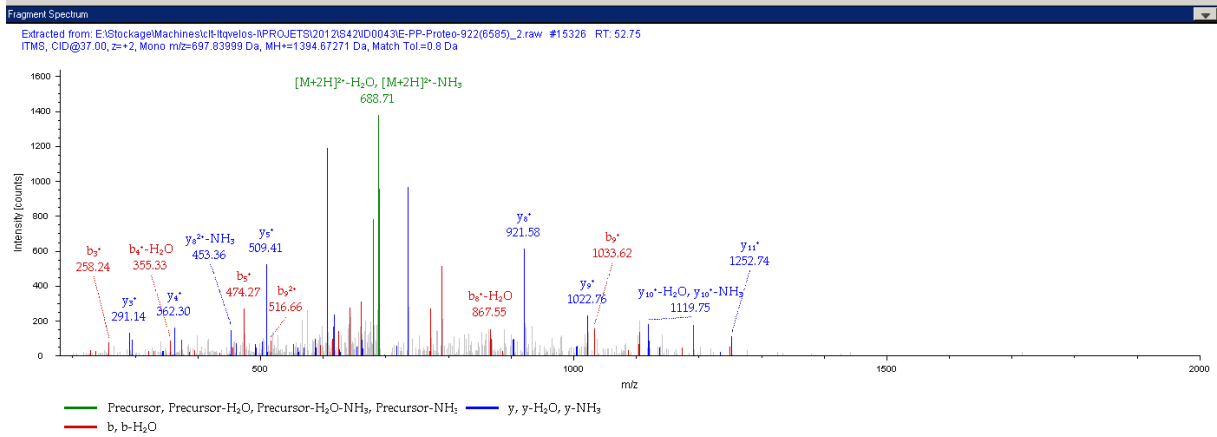

Protein references (1):

- Cystatin-B OS=Homo sapiens GN=CSTB PE=1 SV=2 - [CYTB\_HUMAN]

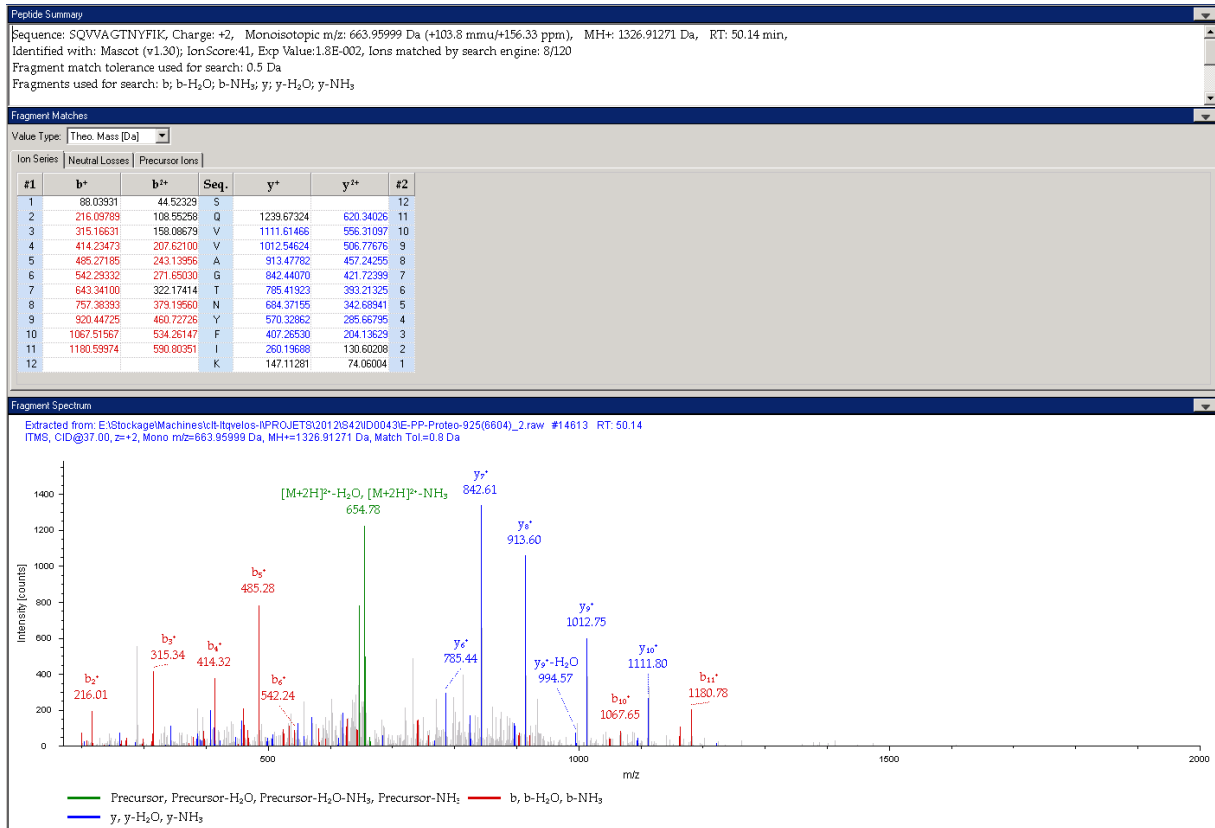



Protein references (1):

- Histidine-rich glycoprotein OS=Homo sapiens GN=HRG PE=1 SV=1 - [HRG\_HUMAN]

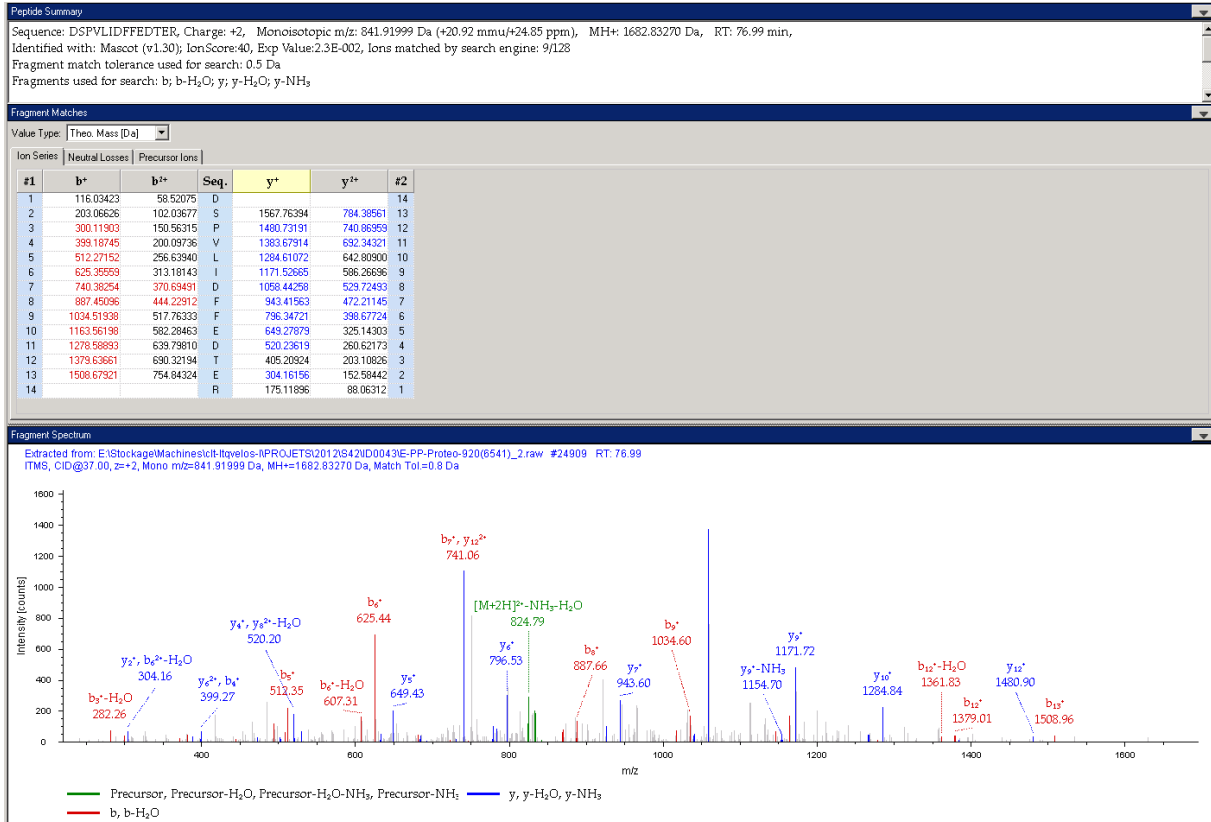

## Protein references (1):

- Ig mu heavy chain disease protein OS=Homo sapiens PE=1 SV=1 - [MUCB\_HUMAN]

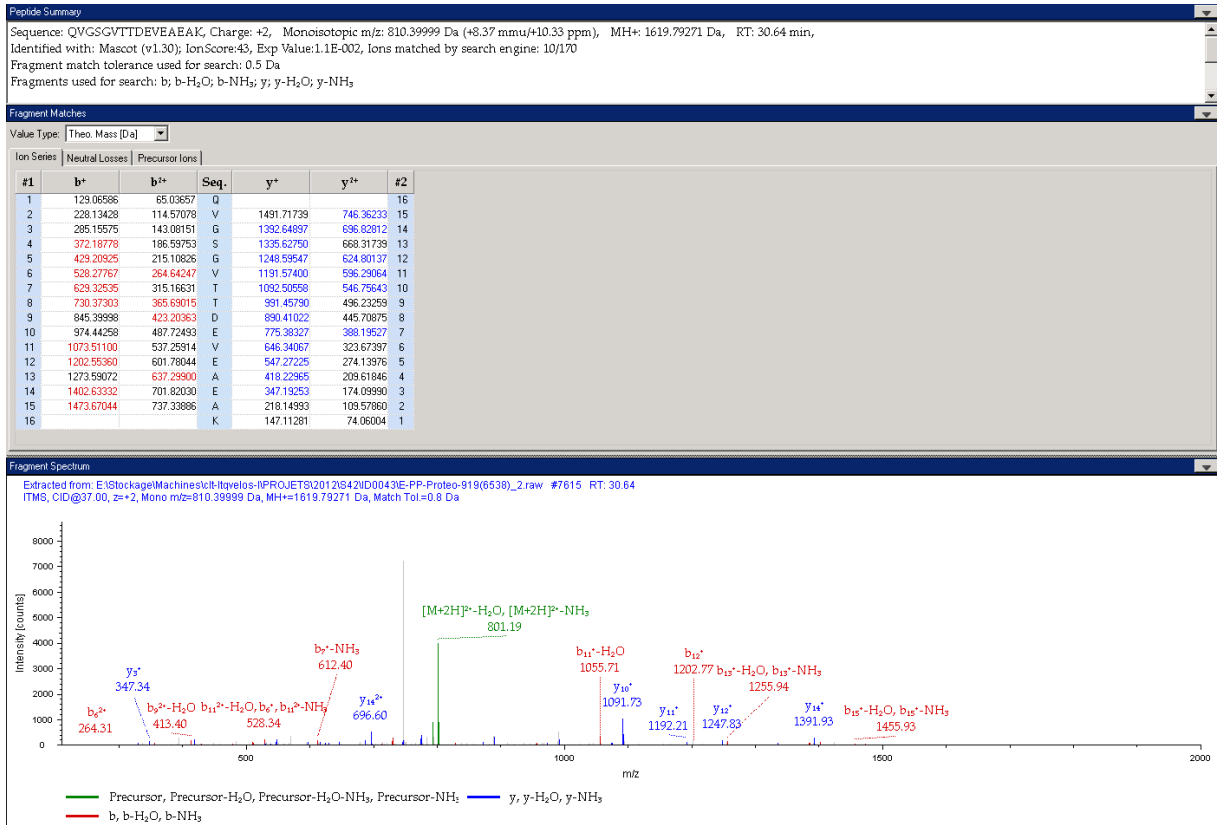

Protein reference :

2'-5'-oligoadenylate synthase 2 OS=Homo sapiens GN=OAS2 PE=1 SV=3

Peptide Summary

Sequence: GSGTAEVELK, Charge: +2, Monoisotopic m/z: 495.72009 Da (-38.72 mmu/-78.11 ppm), MH+: 990.43291 Da, RT: 29.94 min, Identified with: Mascot (v1.30); IonScore:75, Exp Value:2.6E-005, Ions matched by search engine: 8/84  
 Fragment match tolerance used for search: 0.5 Da  
 Fragments used for search: b; b-H<sub>2</sub>O; y; y-H<sub>2</sub>O; y-NH<sub>3</sub>

Fragment Matches

Value Type: Theo. Mass [Da]

| #1 | Neutral Losses |                                  | Seq. | Precursor Ions |                                  | #2 |
|----|----------------|----------------------------------|------|----------------|----------------------------------|----|
|    | b <sup>+</sup> | b <sup>+</sup> -H <sub>2</sub> O |      | y <sup>+</sup> | y <sup>+</sup> -H <sub>2</sub> O |    |
| 1  | 58.02875       | 29.51801                         | G    |                |                                  | 10 |
| 2  | 145.06078      | 73.03403                         | S    | 333.49880      | 467.24804                        | 9  |
| 3  | 202.08225      | 101.54476                        | G    | 846.45677      | 423.73202                        | 8  |
| 4  | 303.12933      | 152.06860                        | T    | 789.43530      | 395.22129                        | 7  |
| 5  | 374.16705      | 187.58716                        | A    | 688.38762      | 344.69745                        | 6  |
| 6  | 503.20965      | 252.10846                        | E    | 617.35950      | 309.17869                        | 5  |
| 7  | 602.27807      | 301.54257                        | V    | 498.30790      | 244.55759                        | 4  |
| 8  | 731.32067      | 366.16297                        | E    | 393.23848      | 195.12338                        | 3  |
| 9  | 844.40474      | 422.70601                        | L    | 260.19688      | 130.60208                        | 2  |
| 10 |                |                                  | K    | 147.11281      | 74.06004                         | 1  |

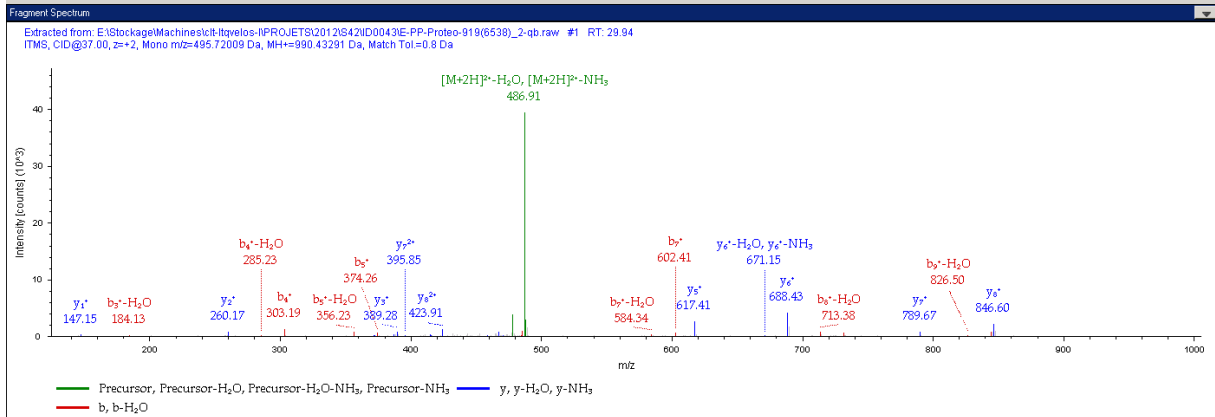

## Protein references (1):

- Calpain-1 catalytic subunit OS=Homo sapiens GN=CAPN1 PE=1 SV=1 - [CAN1\_HUMAN]

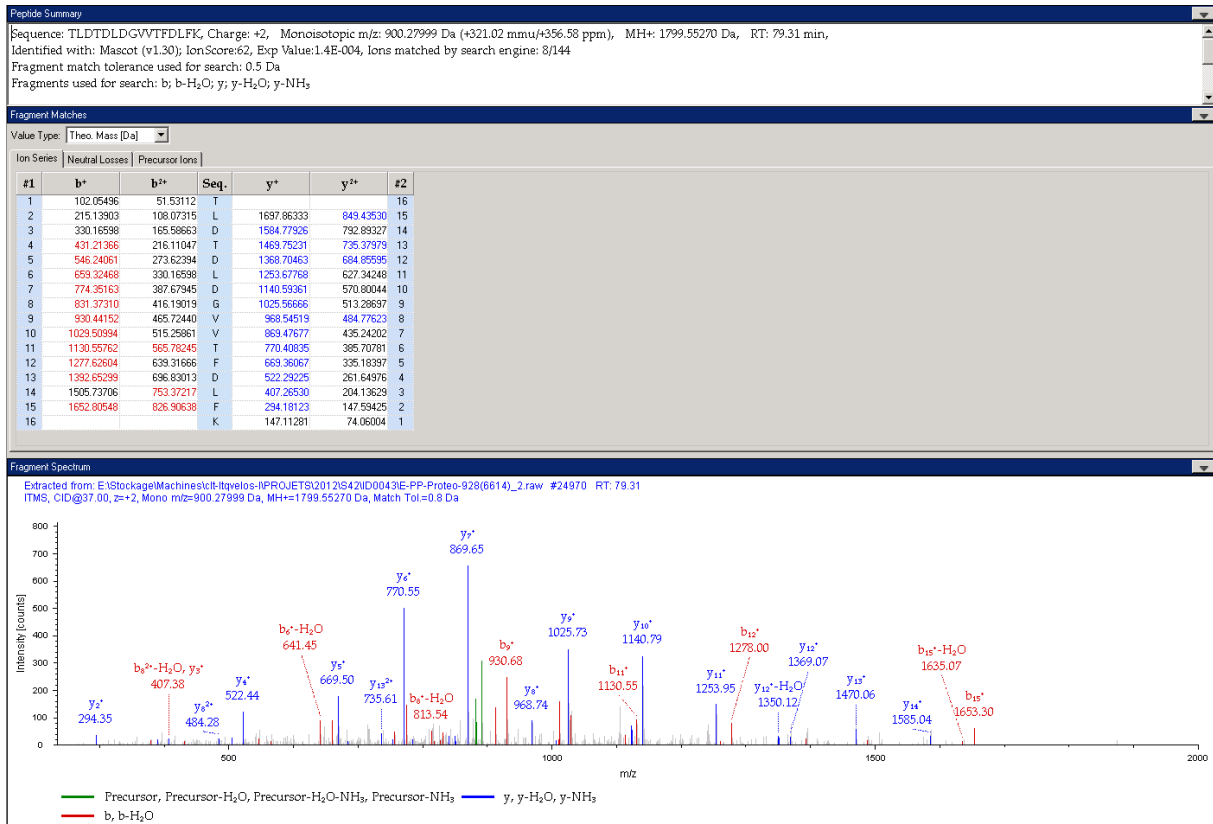

Protein references (1):

- Myosin light chain 3 OS=Homo sapiens GN=MYL3 PE=1 SV=3 - [MYL3\_HUMAN]

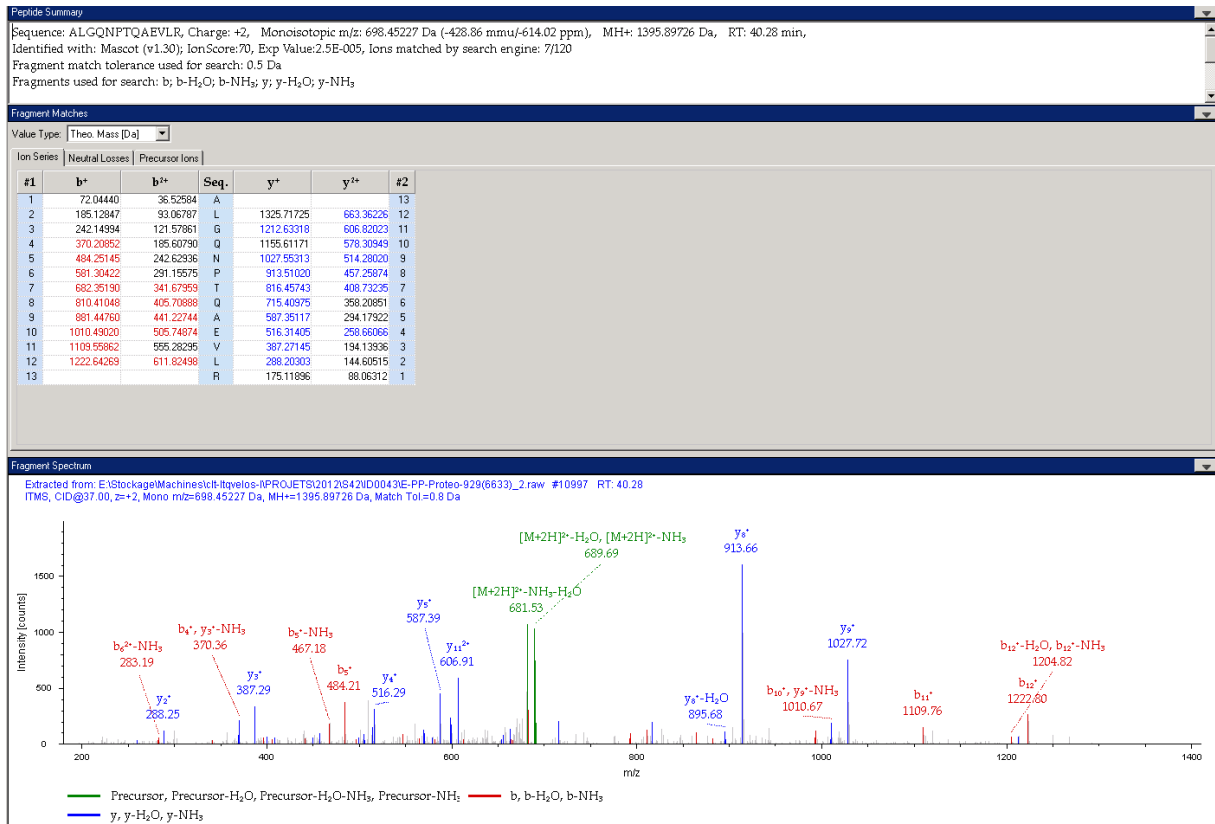

Protein references (1):

- Protein S100-A6 OS=Homo sapiens GN=S100A6 PE=1 SV=1 - [S10A6\_HUMAN]

Peptide Summary

Sequence: LQDAEIAK, Charge: +2, Monoisotopic m/z: 458.2000 Da (-48.43 mmu/-105.69 ppm), MH+: 915.39272 Da, RT: 28.67 min, Identified with: Mascot (v1.30); IonScore:39, Exp Value:3.1E-002, Ions matched by search engine: 7/72  
 Fragment match tolerance used for search: 0.5 Da  
 Fragments used for search: b, b-H<sub>2</sub>O, b-NH<sub>2</sub>; y, y-H<sub>2</sub>O, y-NH<sub>2</sub>

Fragment Matches

Value Type: Theor. Mass [Da]

Ion Series: Neutral Losses | Precursor Ions

| #1 | b*        | b*+H <sub>2</sub> O | Seq. | y*        | y*+H <sub>2</sub> O | #2 |
|----|-----------|---------------------|------|-----------|---------------------|----|
| 1  | 114.09135 | 57.54931            | L    |           |                     | 8  |
| 2  | 242.14593 | 121.57060           | Q    | 002.40540 | 401.70634           | 7  |
| 3  | 367.17688 | 179.09208           | D    | 674.34682 | 337.67705           | 6  |
| 4  | 428.21400 | 214.61064           | A    | 593.31987 | 280.16357           | 5  |
| 5  | 557.25680 | 279.13194           | E    | 498.28275 | 244.64501           | 4  |
| 6  | 670.34067 | 335.67397           | I    | 359.24015 | 180.12371           | 3  |
| 7  | 741.37775 | 371.19253           | A    | 246.15600 | 123.50160           | 2  |
| 8  |           |                     | R    | 175.11896 | 88.06312            | 1  |

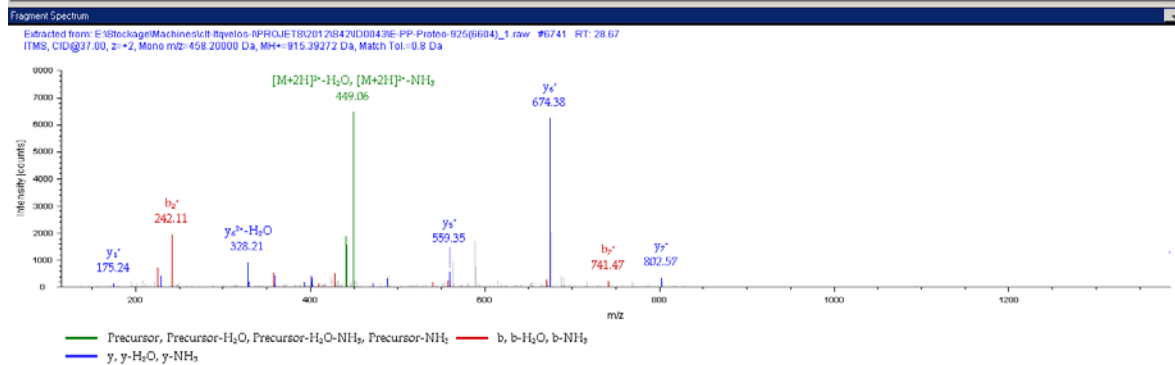

Protein references (1):

- Tyrosine-protein kinase JAK1 OS=Homo sapiens GN=JAK1 PE=1 SV=2 - [JAK1\_HUMAN]

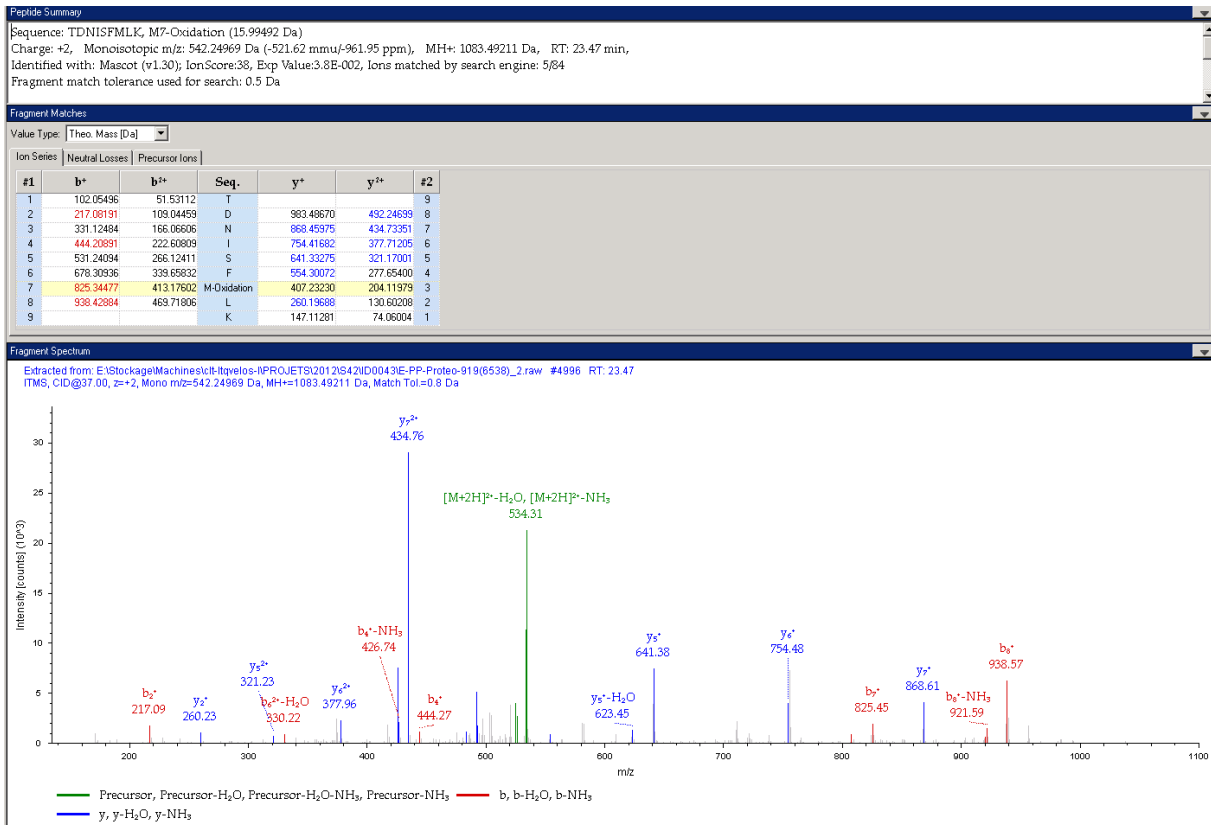

Protein references (1):

- Enoyl-CoA hydratase, mitochondrial OS=Homo sapiens GN=ECHS1 PE=1 SV=4 - [ECHM\_HUMAN]

Peptide Summary  
 Sequence: SLAMEMVLTGDR, M4-Oxidation (15.99492 Da), M6-Oxidation (15.99492 Da)  
 Charge: +2, Monoisotopic m/z: 677.59999 Da (-220.91 mmu/-326.02 ppm), MH+: 1354.19271 Da, RT: 39.51 min,  
 Identified with: Mascot (v1.30); IonScore:41, Exp Value:1.8E-002, Ions matched by search engine: 12/108  
 Fragment match tolerance used for search: 0.5 Da

Fragment Matches

Value Type: Theo. Mass [Da]

Ion Series: Neutral Losses | Precursor Ions

| #1 | b*         | b**       | Seq.        | y*         | y**       | #2 |
|----|------------|-----------|-------------|------------|-----------|----|
| 1  | 88.0331    | 44.52325  | S           |            |           | 12 |
| 2  | 201.12338  | 101.06533 | L           | 1267.60217 | 634.30472 | 11 |
| 3  | 272.16050  | 136.58269 | A           | 1154.51810 | 577.76269 | 10 |
| 4  | 419.19591  | 210.10159 | M-Oxidation | 1033.48098 | 542.24413 | 9  |
| 5  | 548.23851  | 274.62289 | E           | 938.44567  | 488.72642 | 8  |
| 6  | 695.27383  | 348.14060 | M-Oxidation | 807.40297  | 404.20512 | 7  |
| 7  | 794.34235  | 397.67481 | V           | 660.36795  | 330.68741 | 6  |
| 8  | 907.42842  | 454.21695 | L           | 561.29913  | 281.15320 | 5  |
| 9  | 1008.47410 | 504.74069 | T           | 448.21506  | 224.61117 | 4  |

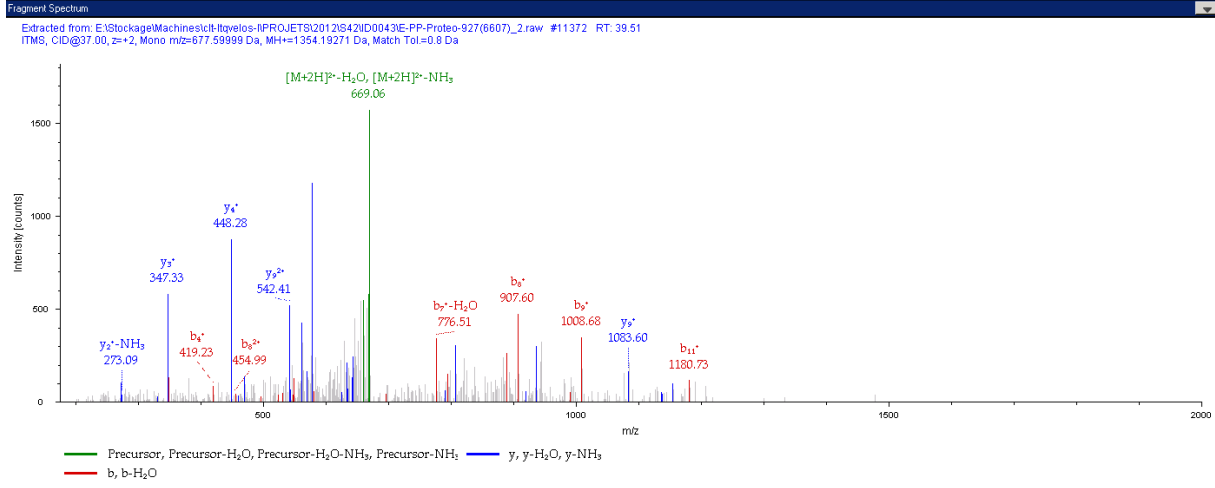



# Protein references (1):

- Calsequestrin-1 OS=Homo sapiens GN=CASQ1 PE=1 SV=3 - [CASQ1\_HUMAN]

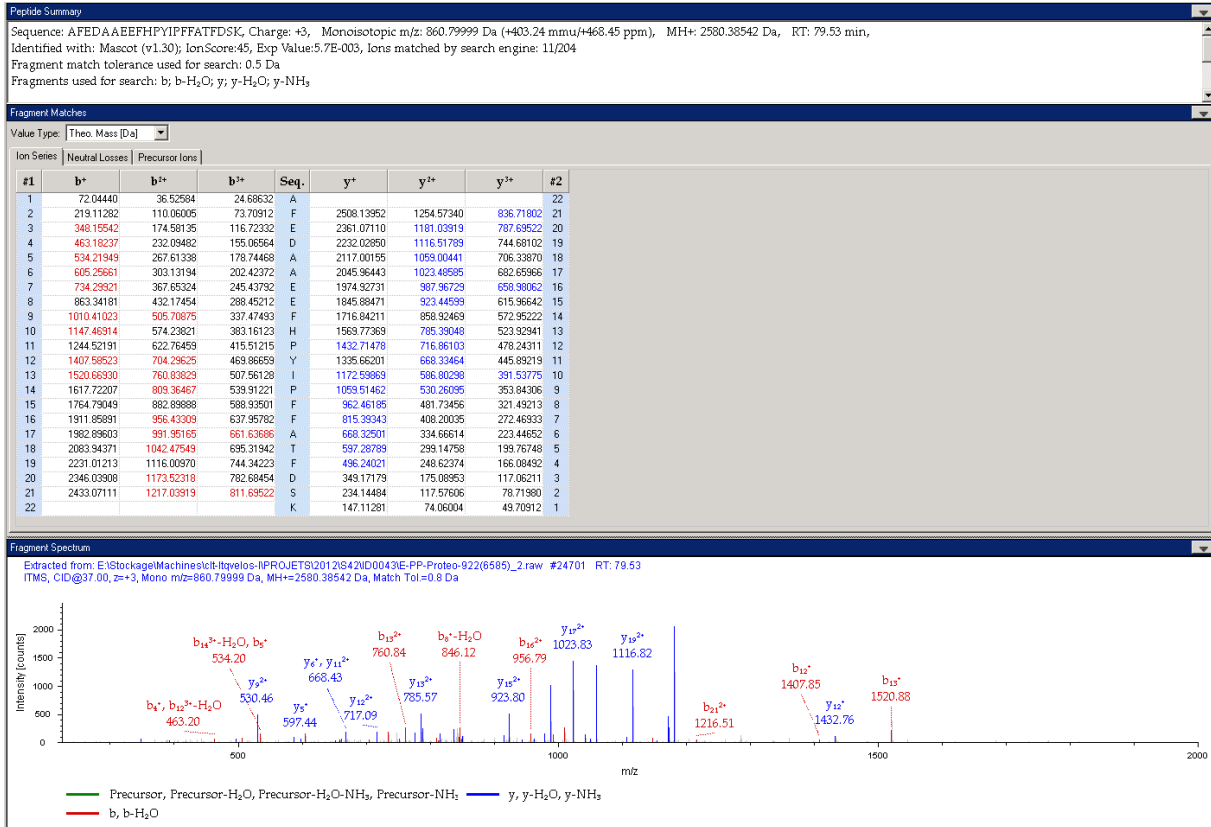

Protein references (1):

- Heat shock 70 kDa protein 4 OS=Homo sapiens GN=HSPA4 PE=1 SV=4 - [HSP74\_HUMAN]

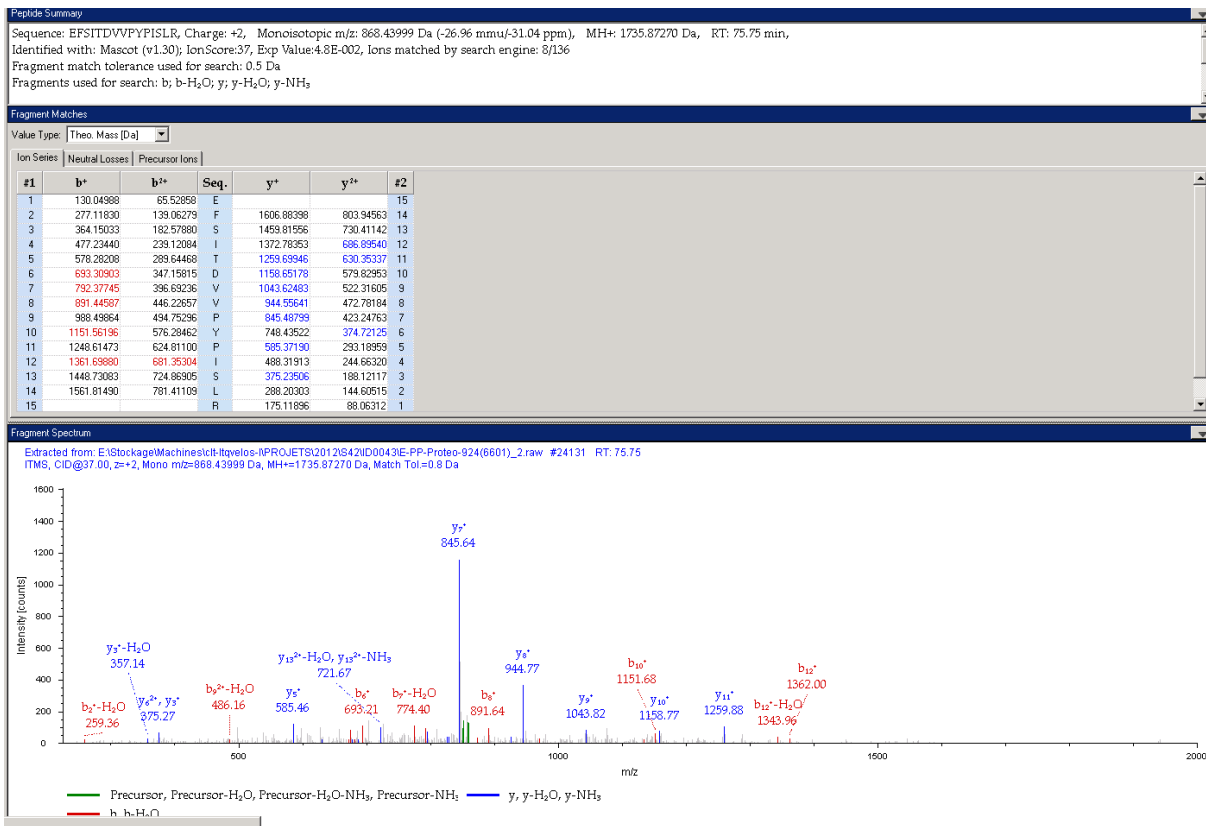

Protein references (1):

- Electron transfer flavoprotein subunit beta OS=Homo sapiens GN=ETFB PE=1 SV=3 - [ETFB\_HUMAN]

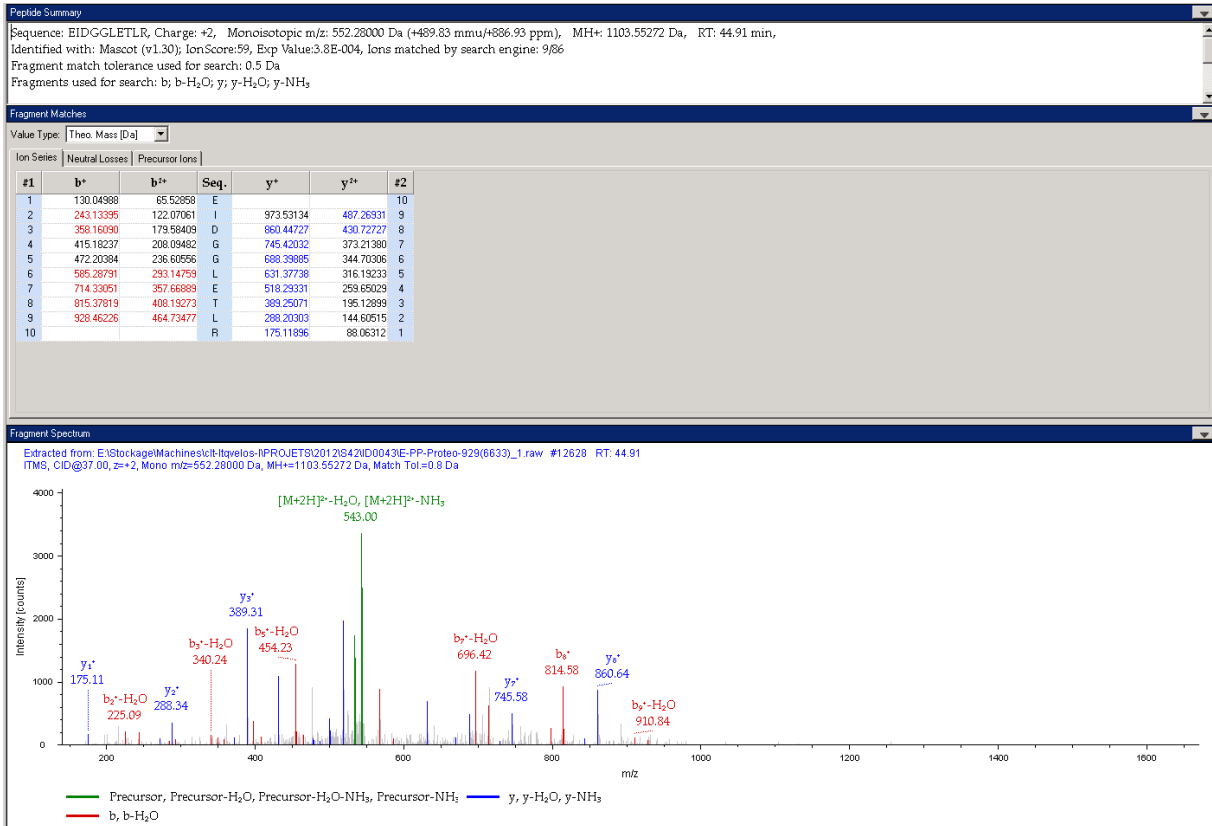

## Protein references (1):

- Afamin OS=Homo sapiens GN=AFM PE=1 SV=1 - [AFAM\_HUMAN]

Peptide Summary

Sequence: IAPQLSTEELVSLGEK, Charge: +2, Monoisotopic m/z: 857.75999 Da (+293.03 mmu/+341.62 ppm), MH+: 1714.51270 Da, RT: 59.38 min, Identified with: Mascot (v1.30); IonScore:46, Exp Value:6.6E-003, Ions matched by search engine: 10/162  
 Fragment match tolerance used for search: 0.5 Da  
 Fragments used for search: b; b-H<sub>2</sub>O; b-NH<sub>3</sub>; y; y-H<sub>2</sub>O; y-NH<sub>3</sub>

Fragment Matches

Value Type: Theo. Mass [Da]

| #1 | Neutral Losses |                 | Seq. | Precursor Ions |                 | #2 |
|----|----------------|-----------------|------|----------------|-----------------|----|
|    | b <sup>+</sup> | b <sup>2+</sup> |      | y <sup>+</sup> | y <sup>2+</sup> |    |
| 1  | 114.09135      | 57.54591        | I    |                |                 | 16 |
| 2  | 185.12847      | 93.06787        | A    | 1600.84292     | 800.92510       | 15 |
| 3  | 282.18124      | 141.59426       | P    | 1523.80580     | 765.40654       | 14 |
| 4  | 410.23982      | 205.62395       | Q    | 1432.75303     | 716.88015       | 13 |
| 5  | 523.32389      | 262.16598       | L    | 1304.69445     | 652.85086       | 12 |
| 6  | 610.35992      | 305.68160       | S    | 1191.61038     | 596.30883       | 11 |
| 7  | 711.40360      | 356.20544       | T    | 1104.57835     | 552.79281       | 10 |
| 8  | 840.44620      | 420.72674       | E    | 1003.53067     | 502.26897       | 9  |
| 9  | 963.48880      | 485.24804       | E    | 874.48807      | 437.74767       | 8  |
| 10 | 1082.57287     | 541.79007       | L    | 745.44547      | 373.22637       | 7  |
| 11 | 1181.64125     | 591.32428       | V    | 632.36140      | 316.68434       | 6  |
| 12 | 1288.67332     | 634.84030       | S    | 533.23298      | 267.15013       | 5  |
| 13 | 1381.75739     | 691.38233       | L    | 446.26895      | 223.63411       | 4  |
| 14 | 1438.77886     | 719.89307       | G    | 333.17688      | 167.05208       | 3  |
| 15 | 1567.82146     | 784.41437       | E    | 276.15541      | 138.58134       | 2  |
| 16 |                |                 | K    | 147.11281      | 74.06004        | 1  |

Fragment Spectrum

Extracted from: E:\Stockage\Machines\ict-l\velos-IPROJET\SI2012642\0D0043E-PP-Proteo-920(6541)\_2.raw #18588 RT: 59.38  
 ITMS, CID@37.00, z=+2, Mono m/z=857.75999 Da, MH+=1714.51270 Da, Match Tol=0.8 Da

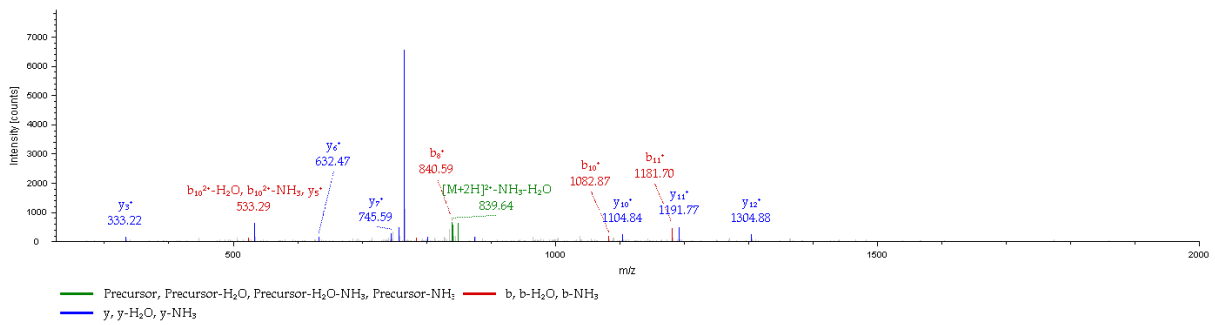

Protein references (1):

- Elongation factor Tu, mitochondrial OS=Homo sapiens GN=TUFM PE=1 SV=2 - [EFTU\_HUMAN]

Peptide Summary

Sequence: AEAGDNLGALVR, Charge: +2, Monoisotopic m/z: 593.20000 Da (-114.89 mmu/-193.68 ppm), MH+: 1185.39271 Da, RT: 46.82 min, Identified with: Mascot (v1.30); IonScore:41, Exp Value:2.0E-002, Ions matched by search engine: 10/106  
 Fragment match tolerance used for search: 0.5 Da  
 Fragments used for search: b; b-H<sub>2</sub>O; b-NH<sub>3</sub>; y; y-H<sub>2</sub>O; y-NH<sub>3</sub>

Fragment Matches

Value Type: Theo. Mass [Da]

| Ion Series | Neutral Losses | Precursor Ions                   |      |                |                                  |    |  |
|------------|----------------|----------------------------------|------|----------------|----------------------------------|----|--|
| #1         | b <sup>+</sup> | b <sup>+</sup> -H <sub>2</sub> O | Seq. | y <sup>+</sup> | y <sup>+</sup> -H <sub>2</sub> O | #2 |  |
| 1          | 72.04440       | 36.52584                         | A    |                |                                  | 12 |  |
| 2          | 201.08700      | 101.04714                        | E    | 1114.58518     | 557.79623                        | 11 |  |
| 3          | 272.12412      | 136.56570                        | A    | 985.54258      | 493.27493                        | 10 |  |
| 4          | 329.14599      | 165.07643                        | G    | 914.50546      | 457.75637                        | 9  |  |
| 5          | 444.17254      | 222.58991                        | D    | 857.48399      | 429.24563                        | 8  |  |
| 6          | 558.21547      | 279.61137                        | N    | 742.45704      | 371.73216                        | 7  |  |
| 7          | 671.23954      | 336.15341                        | L    | 628.41411      | 314.71069                        | 6  |  |
| 8          | 728.32101      | 364.66414                        | G    | 515.33004      | 258.16866                        | 5  |  |
| 9          | 799.35813      | 400.18270                        | A    | 458.30857      | 229.65792                        | 4  |  |
| 10         | 912.44220      | 456.72474                        | L    | 387.27145      | 194.13936                        | 3  |  |
| 11         | 1011.51062     | 506.25895                        | V    | 274.18738      | 137.59733                        | 2  |  |
| 12         |                |                                  | R    | 175.11896      | 88.06312                         | 1  |  |

Fragment Spectrum

Extracted from: E:\Stockage\Machines\itc-Itqvelos-IPROJETS\2012642\UD0043E-PP-Proteo-927(6607)\_1.raw #14106 RT: 46.82 ITMS, CID@37.00, z=+2, Mono m/z=593.20000 Da, MH+=1185.39271 Da, Match Tol=0.8 Da

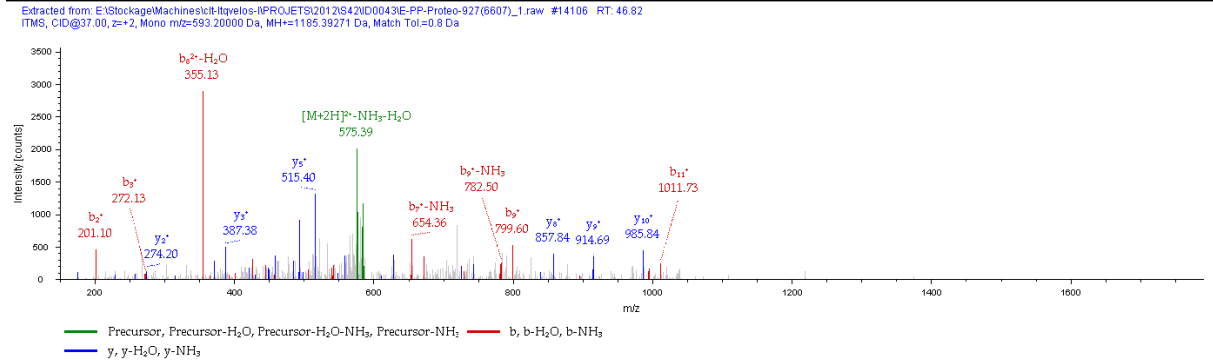

Protein references (1):

- Succinyl-CoA:3-ketoacid coenzyme A transferase 1, mitochondrial OS=Homo sapiens GN=OXCT1 PE=1 SV=1 - [SCOT1\_HUMAN]

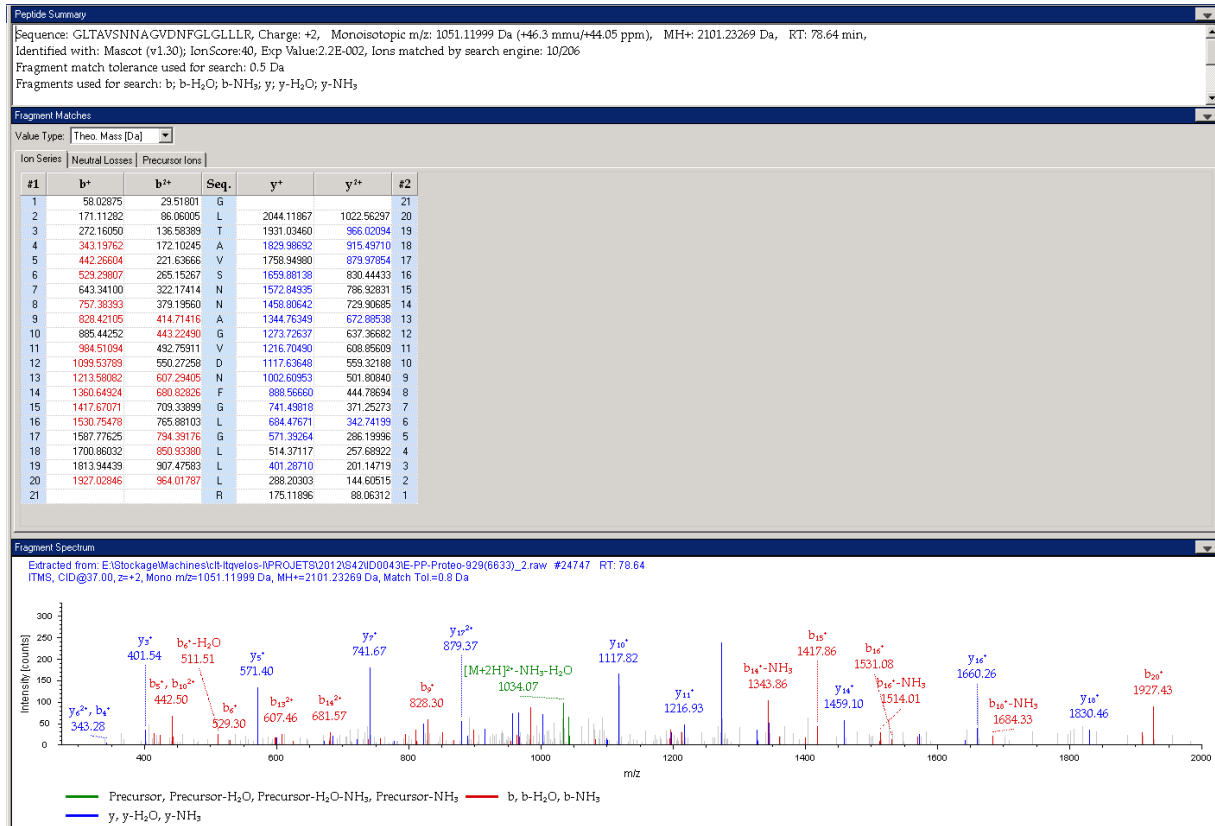

Protein references (1):

- Peptidyl-prolyl cis-trans isomerase A OS=Homo sapiens GN=PPIA PE=1 SV=2 - [PPIA\_HUMAN]

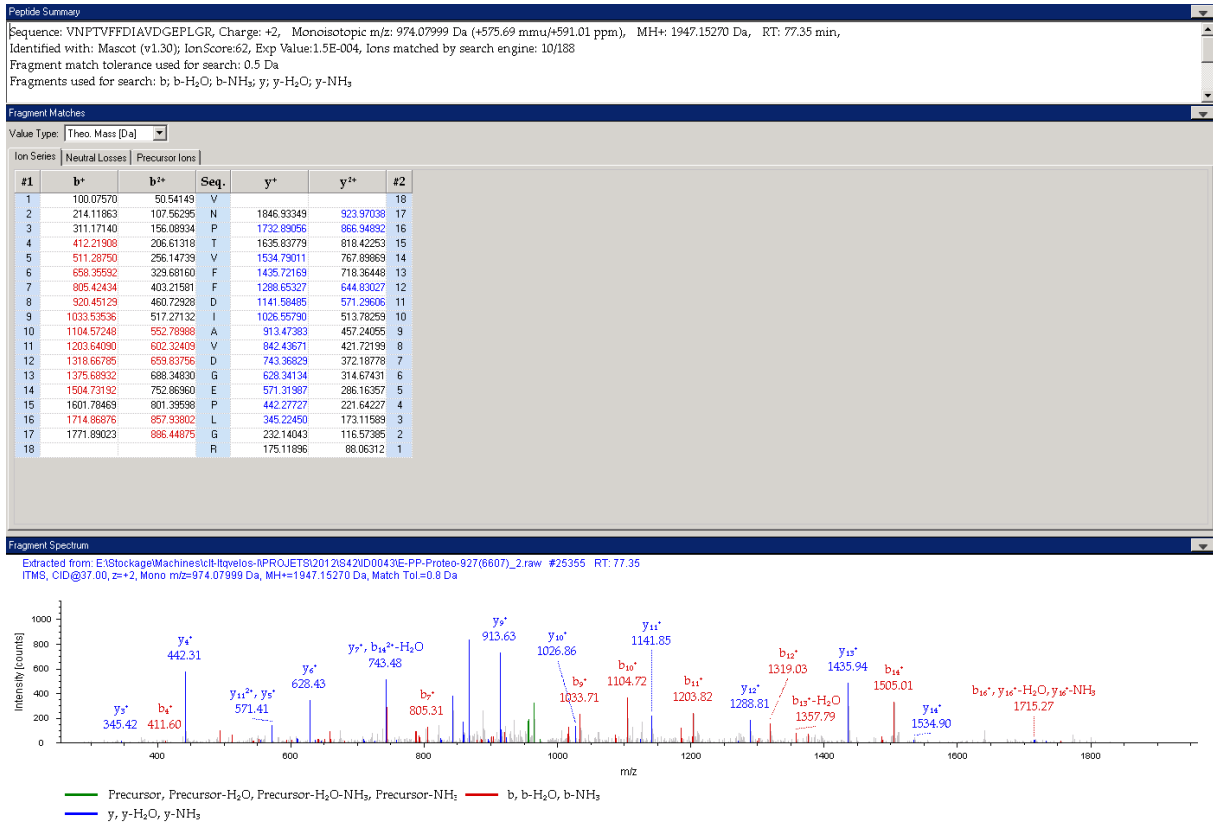

Protein references (1):

- Four and a half LIM domains protein 3 OS=Homo sapiens GN=FHL3 PE=1 SV=4 - [FHL3\_HUMAN]

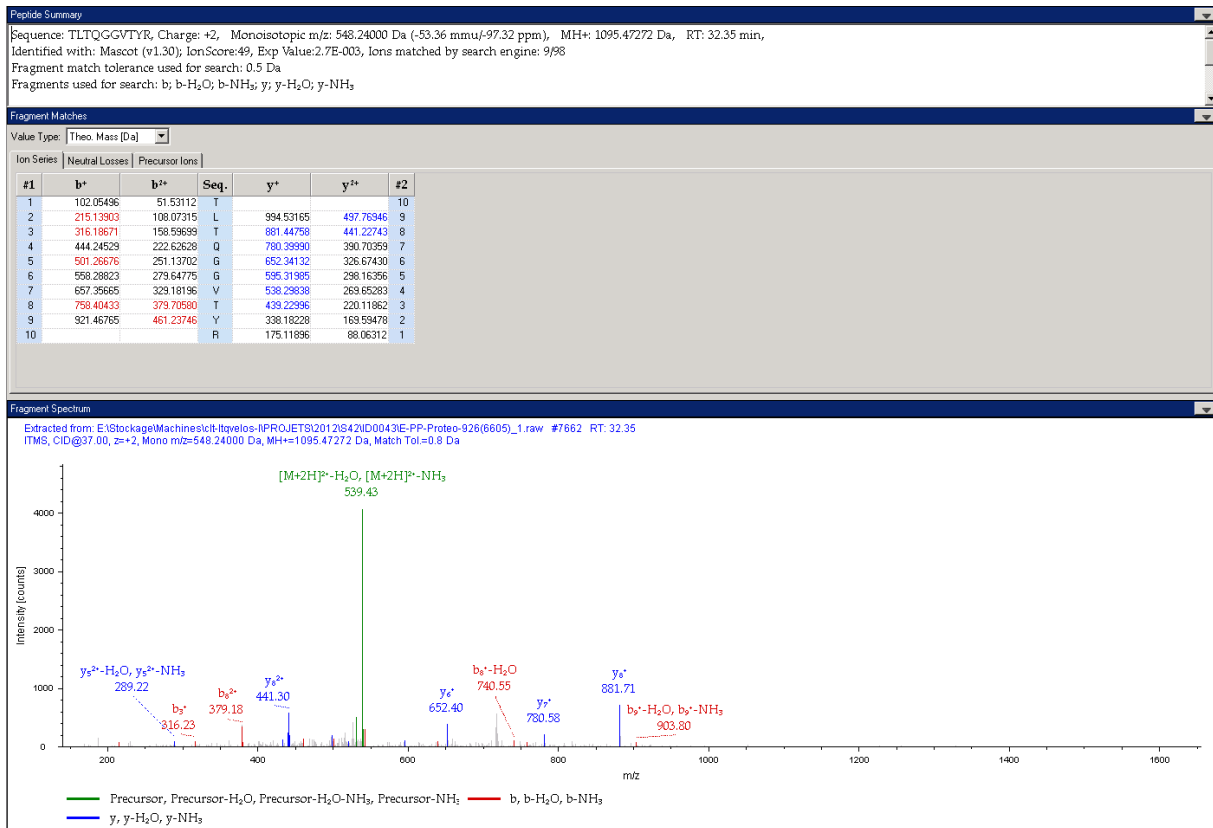



Protein references (1):

- Guanidinoacetate N-methyltransferase OS=Homo sapiens GN=GAMT PE=1 SV=1 - [GAMT\_HUMAN]

Peptide Summary

Sequence: VLEVCGMAIAASK; MS-Oxidation (15.99492 Da)  
 Charge: +2; Monoisotopic m/z: 705.11999 Da (+241.25 mmu/+342.14 ppm); MH+: 1409.23271 Da; RT: 54.70 min;  
 Identified with: Mascot (v1.30); IonScore:38; Exp Value:3.7E-002; Ions matched by search engine: 3/124  
 Fragment match tolerance used for search: 0.5 Da

Fragment Matches

Value Type: Theo. Mass [Da]

| #1 | b*         | b**       | Seq.        | y*         | y**       | #2 |
|----|------------|-----------|-------------|------------|-----------|----|
| 1  | 100.07570  | 50.54149  | V           |            |           | 14 |
| 2  | 213.15977  | 107.08352 | L           | 1309.68214 | 655.34471 | 13 |
| 3  | 342.20237  | 171.60482 | E           | 1196.69807 | 598.00267 | 12 |
| 4  | 441.27079  | 221.13903 | V           | 1067.55547 | 534.28137 | 11 |
| 5  | 498.25226  | 249.64977 | G           | 958.40705  | 494.74716 | 10 |
| 6  | 645.36363  | 323.18368 | F           | 911.46558  | 456.23643 | 9  |
| 7  | 702.38215  | 351.69471 | G           | 764.39716  | 382.70222 | 8  |
| 8  | 849.41756  | 425.21242 | M-Oxidation | 707.37569  | 354.19148 | 7  |
| 9  | 920.45468  | 460.73098 | A           | 560.34027  | 280.67377 | 6  |
| 10 | 1033.53875 | 517.27301 | I           | 489.30315  | 245.15521 | 5  |
| 11 | 1104.57587 | 552.79157 | A           | 376.21908  | 188.61318 | 4  |
| 12 | 1175.61299 | 588.31013 | A           | 305.18196  | 153.09462 | 3  |
| 13 | 1262.64502 | 631.82615 | S           | 234.14484  | 117.57606 | 2  |
| 14 |            |           | K           | 147.11281  | 74.06004  | 1  |

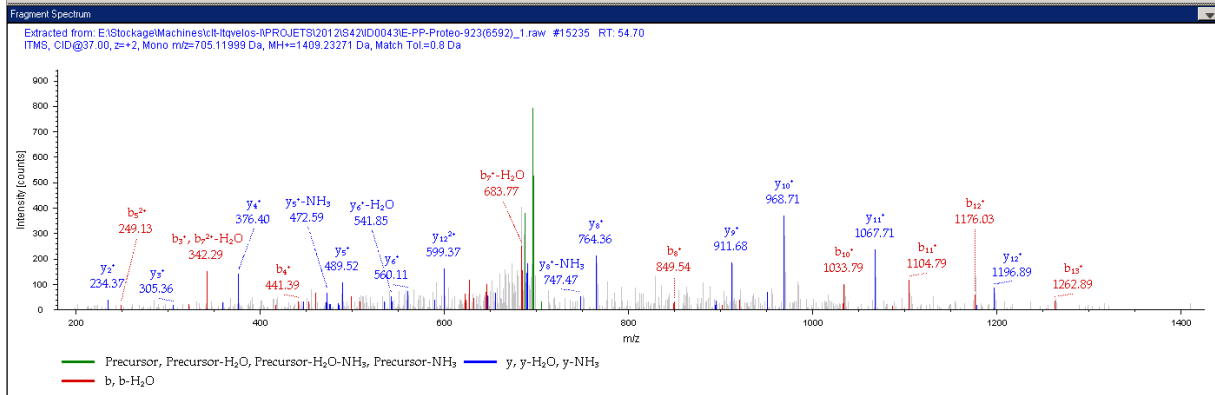

Protein references (1):

- Poly(rC)-binding protein 1 OS=Homo sapiens GN=PCBP1 PE=1 SV=2 - [PCBP1\_HUMAN]

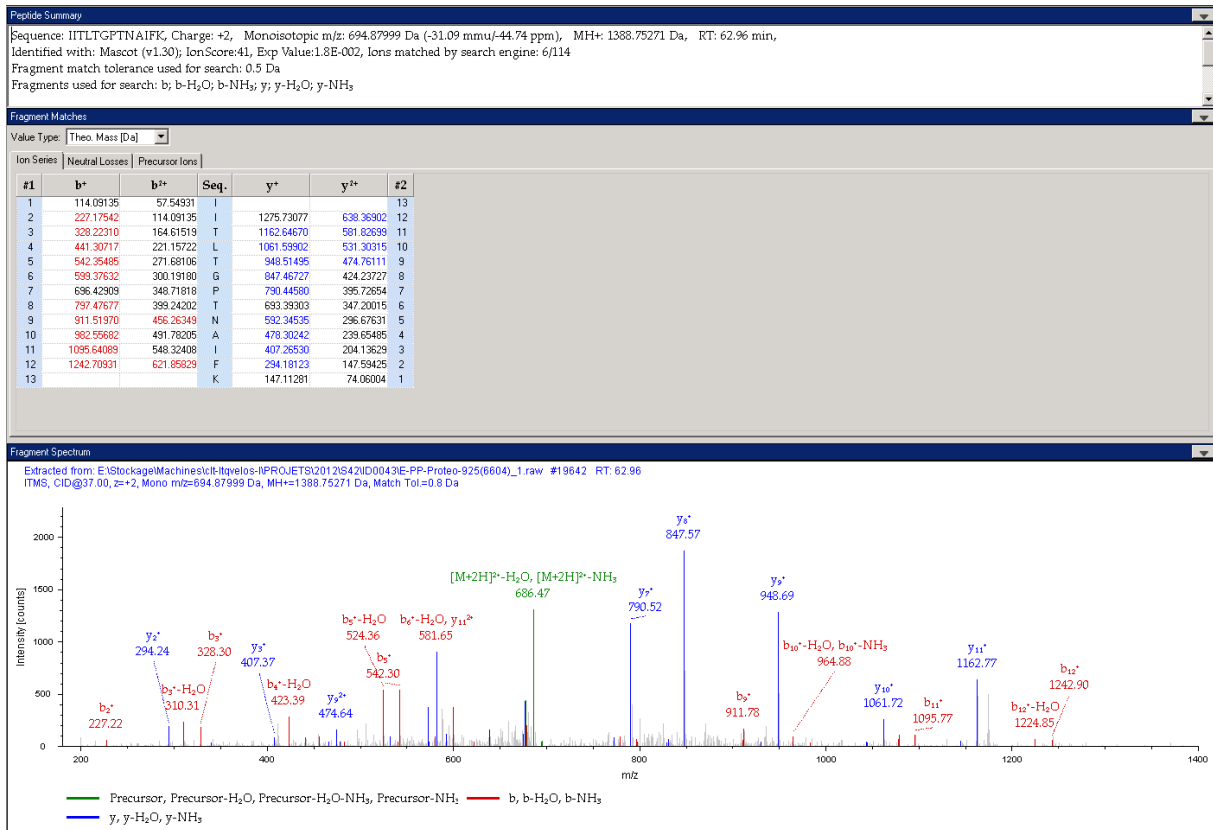

Protein references (1):

- Muscle-related coiled-coil protein OS=Homo sapiens GN=MURC PE=1 SV=2 - [MURC\_HUMAN]

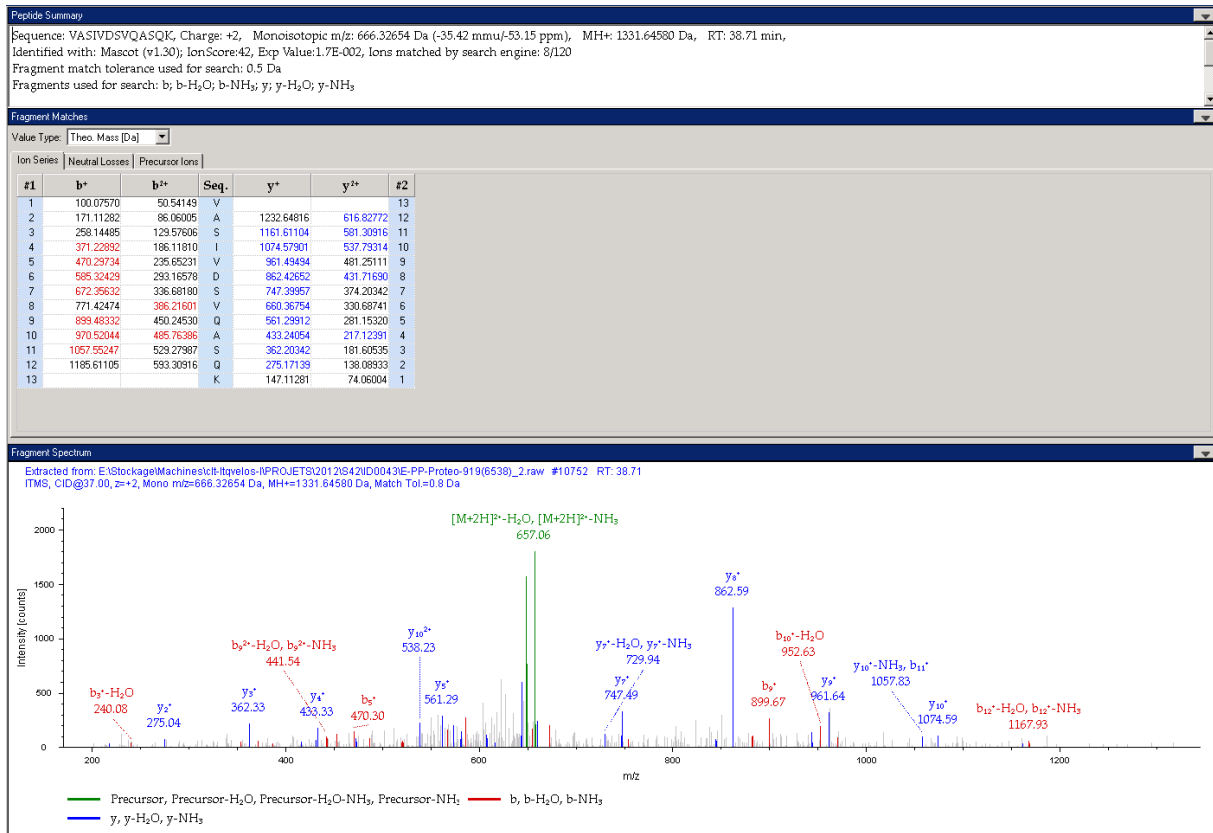

Protein references (1):

- Glutathione S-transferase omega-1 OS=Homo sapiens GN=GSTO1 PE=1 SV=2 - [GSTO1\_HUMAN]

Peptide Summary

Sequence: HEVININLK, Charge: +2, Monoisotopic m/z: 540.24000 Da (-74.12 mmu/-137.19 ppm), MH+: 1079.47272 Da, RT: 42.50 min, Identified with: Mascot (v1.30), IonScore:40, Exp Value:2.4E-002, Ions matched by search engine: 11/72, Fragment match tolerance used for search: 0.5 Da, Fragments used for search: b; b-H<sub>2</sub>O; b-NH<sub>3</sub>; y; y-H<sub>2</sub>O; y-NH<sub>3</sub>

Fragment Matches

Value Type: Theo. Mass [Da]

| Ion Series | Neutral Losses | Precursor Ions   |      |           |                  |    |
|------------|----------------|------------------|------|-----------|------------------|----|
| #1         | b*             | b <sup>+</sup> * | Seq. | y*        | y <sup>+</sup> * | #2 |
| 1          | 138.06619      | 69.53673         | H    |           |                  | 9  |
| 2          | 267.10879      | 134.05803        | E    | 942.56190 | 471.78459        | 8  |
| 3          | 366.17721      | 183.59224        | V    | 813.51930 | 407.26329        | 7  |
| 4          | 473.26128      | 240.13428        | I    | 714.45088 | 357.22908        | 6  |
| 5          | 593.30421      | 297.15574        | N    | 601.36681 | 301.18704        | 5  |
| 6          | 706.38828      | 353.53778        | I    | 487.32388 | 244.16590        | 4  |
| 7          | 820.43121      | 410.71524        | N    | 374.23881 | 187.62354        | 3  |
| 8          | 933.51528      | 467.26128        | L    | 260.19688 | 130.60208        | 2  |
| 9          |                |                  | K    | 147.11281 | 74.06004         | 1  |

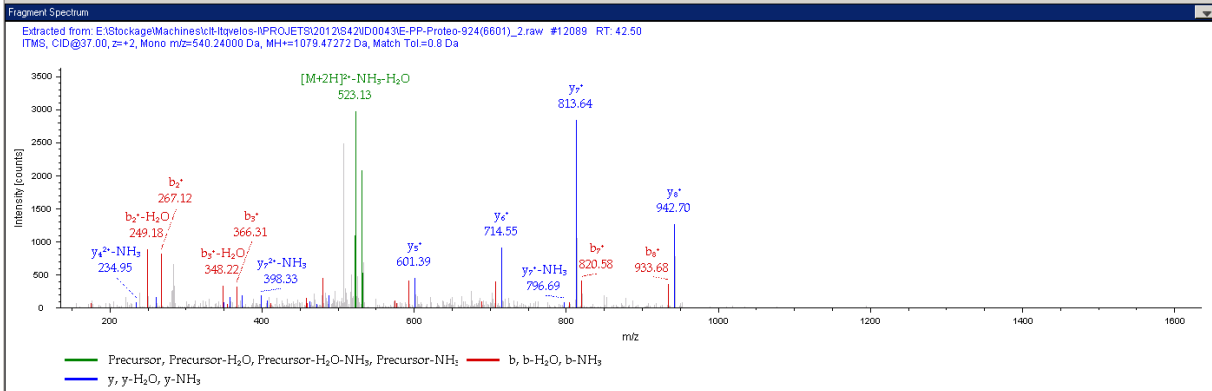

Protein references (1):

- Ras-interacting protein 1 OS=Homo sapiens GN=RASIP1 PE=1 SV=1 - [RAIN\_HUMAN]

Peptide Summary

Sequence: ELVAEALER, Charge: +2, Monoisotopic m/z: 515.84000 Da (+558.12 mmu/+1081.97 ppm), MH+: 1030.67272 Da, RT: 35.77 min, identified with: Mascot (v1.30); IonScore:46, Exp Value:6.5E-003, Ions matched by search engine: 6/78  
 Fragment match tolerance used for search: 0.5 Da  
 Fragments used for search: b; b-H<sub>2</sub>O; y; y-H<sub>2</sub>O; y-NH<sub>3</sub>

Fragment Matches

Value Type: Theor. Mass [Da]

| #1 | Neutral Losses |                 | Seq. | Precursor Ions |                 | #2 |
|----|----------------|-----------------|------|----------------|-----------------|----|
|    | b*             | b <sup>2+</sup> |      | y*             | y <sup>2+</sup> |    |
| 1  | 130.04988      | 65.52658        | E    |                |                 | 9  |
| 2  | 243.13395      | 122.07061       | L    | 900.51496      | 450.76112       | 8  |
| 3  | 342.20237      | 171.60482       | V    | 787.43089      | 394.21908       | 7  |
| 4  | 413.23949      | 207.12338       | A    | 688.36247      | 344.68487       | 6  |
| 5  | 542.28209      | 271.64468       | E    | 617.32535      | 309.16631       | 5  |
| 6  | 613.31921      | 307.16324       | A    | 488.28275      | 244.64501       | 4  |
| 7  | 726.40328      | 363.70528       | L    | 417.24963      | 209.12645       | 3  |
| 8  | 855.44588      | 428.22658       | E    | 304.16156      | 152.58442       | 2  |
| 9  |                |                 | R    | 175.11896      | 88.06312        | 1  |

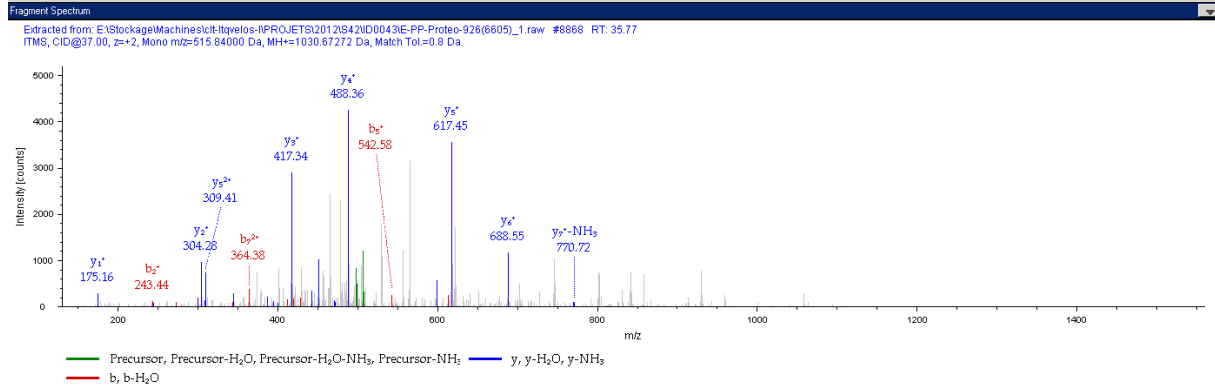

Protein references (1):

- Fatty-acid amide hydrolase 2 OS=Homo sapiens GN=FAAH2 PE=2 SV=1 - [FAAH2\_HUMAN]

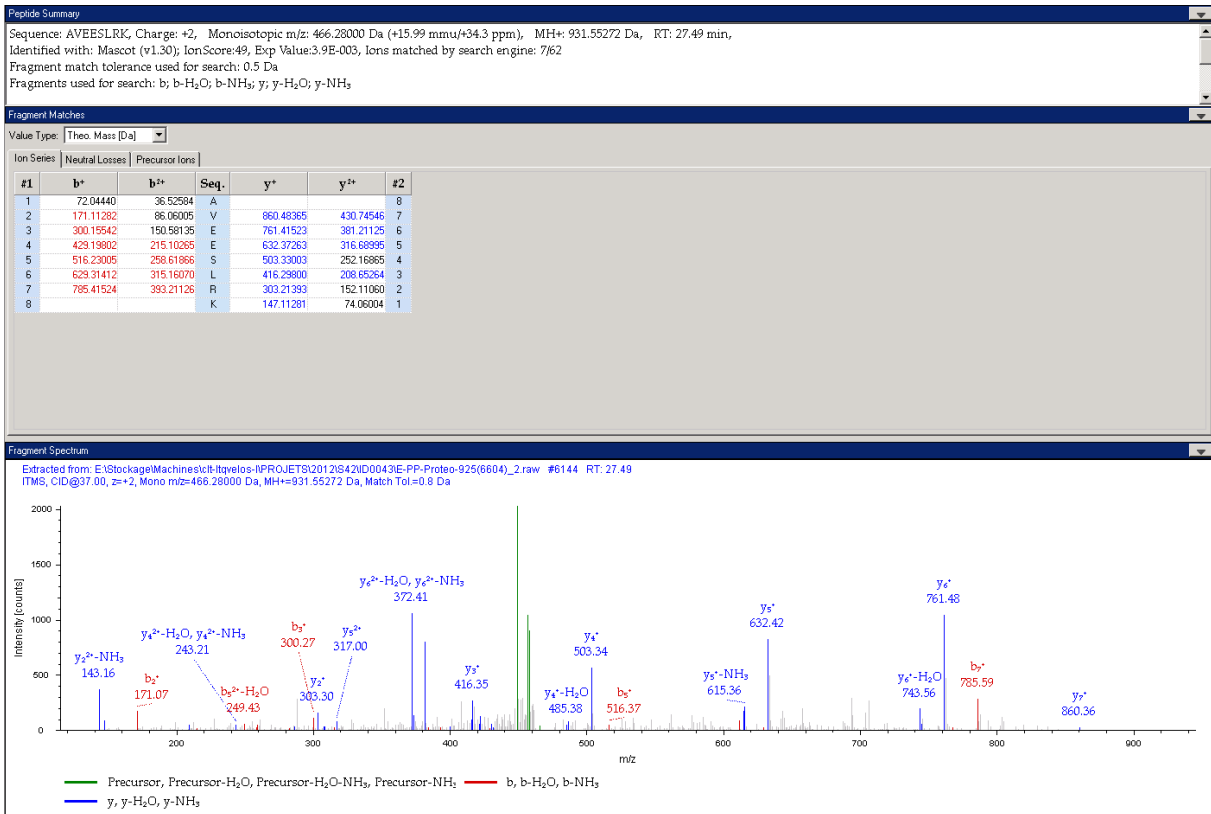

Protein references (1):

- Desmoglein-4 OS=Homo sapiens GN=DSG4 PE=1 SV=1 - [DSG4\_HUMAN]

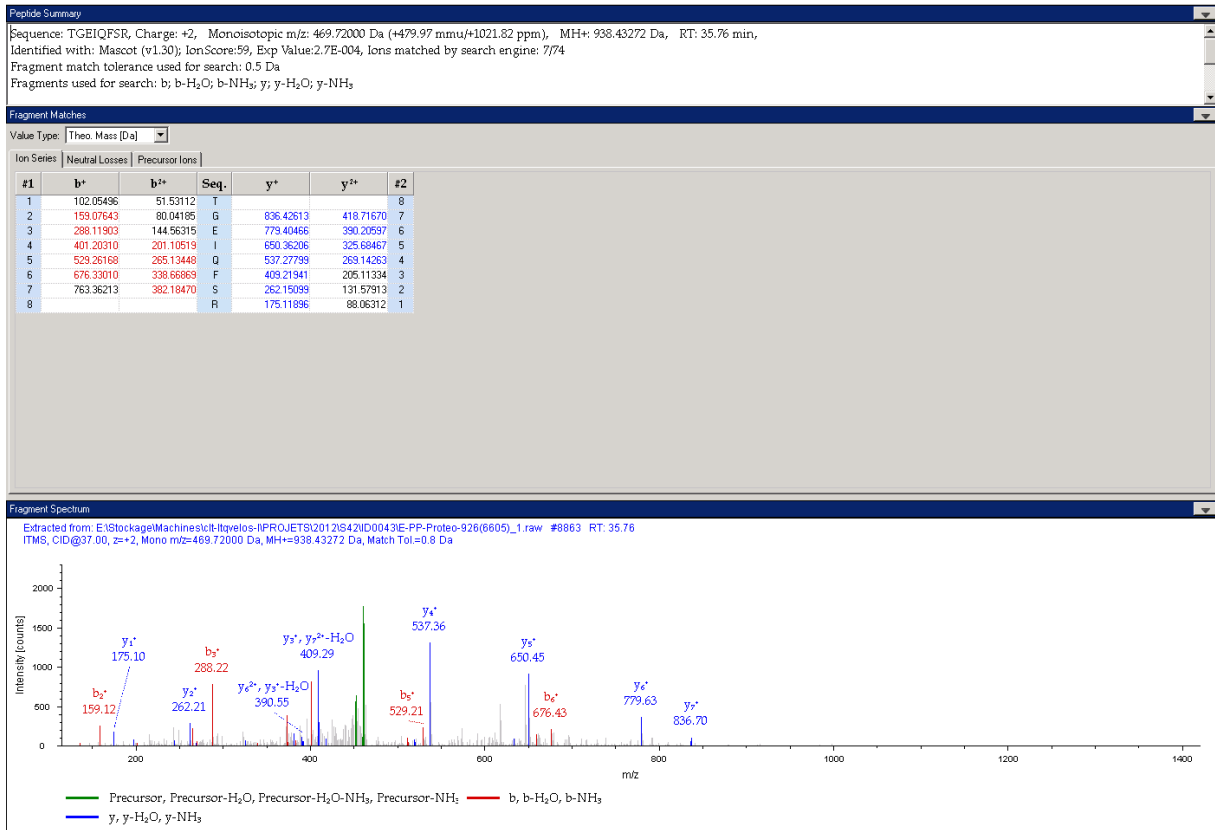

Protein references (1):

- Spartina OS=Homo sapiens GN=SPG20 PE=1 SV=1 - [SPG20\_HUMAN]

Peptide Summary

Sequence: ELPEDLLR, Charge: +2, Monoisotopic m/z: 517.27649 Da (-503.51 mmu/-973.39 ppm), MH+: 1033.54570 Da, RT: 49.04 min, Identified with: Mascot (v1.30); IonScore:40, Exp Value:2.5E-002, Ions matched by search engine: 5/64  
 Fragment match tolerance used for search: 0.5 Da  
 Fragments used for search: b; b-H<sub>2</sub>O; y; y-H<sub>2</sub>O; y-NH<sub>3</sub>

Fragment Matches

Value Type: Theo. Mass [Da]

| #1 | b*        | b <sup>+</sup> | Seq. | y*        | y <sup>+</sup> | #2 |
|----|-----------|----------------|------|-----------|----------------|----|
| 1  | 130.04988 | 65.52658       | E    |           |                | 8  |
| 2  | 243.13395 | 122.07061      | L    | 905.50914 | 453.25821      | 7  |
| 3  | 390.20237 | 195.60482      | F    | 792.42507 | 396.71617      | 6  |
| 4  | 519.24497 | 260.12612      | E    | 645.35685 | 323.18196      | 5  |
| 5  | 634.27192 | 317.63960      | D    | 516.31405 | 259.66966      | 4  |
| 6  | 747.35599 | 374.18163      | L    | 401.28710 | 201.14719      | 3  |
| 7  | 860.44005 | 430.72367      | L    | 298.20303 | 144.60515      | 2  |
| 8  |           |                | R    | 175.11896 | 88.06312       | 1  |

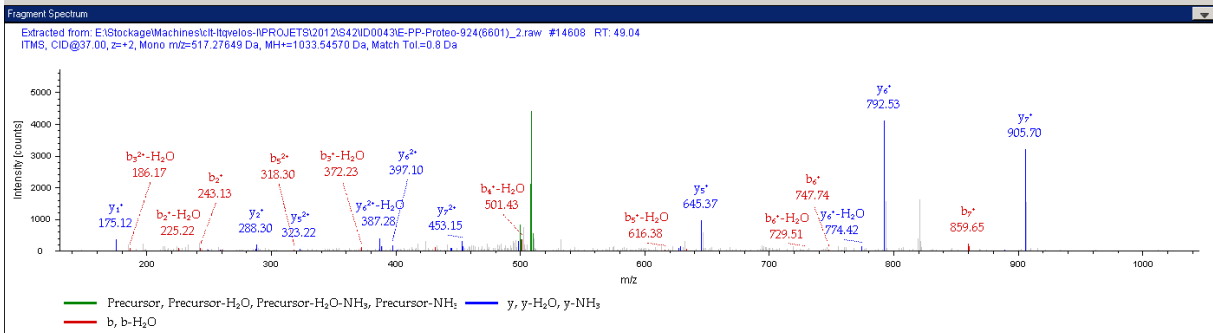



Protein references (1):

- Protein SMG8 OS=Homo sapiens GN=SMG8 PE=1 SV=1 - [SMG8\_HUMAN]

Peptide Summary  
 Sequence: SAVVMGRGR, M5-Oxidation (15.99492 Da)  
 Charge: +2, Monoisotopic m/z: 474.72000 Da (-35.89 mmu/-75.61 ppm), MH+: 948.43272 Da, RT: 44.58 min,  
 Identified with: Mascot (v1.30); IonScore:45, Exp Value:7.6E-003, Ions matched by search engine: 5/68  
 Fragment match tolerance used for search: 0.5 Da

Fragment Matches

Value Type: Theo. Mass [Da]

| Ion Series | Neutral Losses | Precursor Ions  |             |                |                 |    |
|------------|----------------|-----------------|-------------|----------------|-----------------|----|
| #1         | b*             | b <sup>2+</sup> | Seq.        | y <sup>+</sup> | y <sup>2+</sup> | #2 |
| 1          | 86.03931       | 44.52329        | S           |                |                 | 9  |
| 2          | 159.07643      | 80.04165        | A           | 861.47240      | 431.23904       | 8  |
| 3          | 258.14485      | 129.57606       | V           | 790.43528      | 395.72128       | 7  |
| 4          | 357.21327      | 179.11027       | V           | 691.36686      | 346.18707       | 6  |
| 5          | 504.24868      | 252.62798       | M-Oxidation | 592.29844      | 296.65286       | 5  |
| 6          | 561.27015      | 281.13871       | G           | 445.26302      | 223.13515       | 4  |
| 7          | 717.37127      | 359.18927       | R           | 388.24195      | 194.62441       | 3  |
| 8          | 774.39274      | 387.70001       | G           | 232.14043      | 116.57385       | 2  |
| 9          |                |                 | R           | 175.11896      | 88.06312        | 1  |

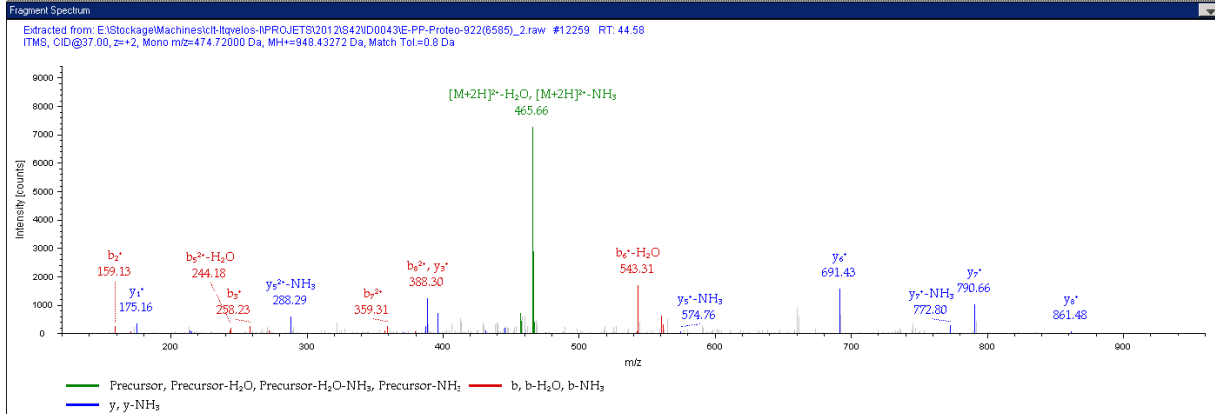

Protein references (2):

- Olfactory receptor 2T2 OS=Homo sapiens GN=OR2T2 PE=2 SV=1 - [OR2T2\_HUMAN]
- Olfactory receptor 2T35 OS=Homo sapiens GN=OR2T35 PE=2 SV=1 - [O2T35\_HUMAN]

Peptide Summary

Sequence: VATVIRKKG, Charge: +2, Monoisotopic m/z: 421.78632 Da (-488.46 mmu/-1158.08 ppm), MH+: 842.56536 Da, RT: 40.86 min, Identified with: Mascot (v1.30); IonScore:42, Exp Value:1.5E-002, Ions matched by search engine: 4/58  
 Fragment match tolerance used for search: 0.5 Da  
 Fragments used for search: b; b-H<sub>2</sub>O; b-NH<sub>3</sub>; y; y-H<sub>2</sub>O; y-NH<sub>3</sub>

Fragment Matches

Value Type: Theo. Mass [Da]

Ion Series: Neutral Losses | Precursor Ions

| #1 | b*        | b**       | Seq. | y*        | y**       | #2 |
|----|-----------|-----------|------|-----------|-----------|----|
| 1  | 100.07570 | 50.54149  | V    |           |           | 8  |
| 2  | 171.11282 | 86.06005  | A    | 744.47269 | 372.73998 | 7  |
| 3  | 272.16090 | 136.58389 | T    | 673.43657 | 337.22142 | 6  |
| 4  | 371.22892 | 186.11810 | V    | 572.38789 | 286.69798 | 5  |
| 5  | 484.31299 | 242.66013 | I    | 473.31947 | 237.16337 | 4  |
| 6  | 640.41411 | 320.71063 | R    | 360.23640 | 180.62134 | 3  |
| 7  | 768.50908 | 384.75818 | K    | 204.13428 | 102.57078 | 2  |
| 8  |           |           | G    | 76.03931  | 38.52329  | 1  |

Fragment Spectrum

Extracted from: E:\Storage\Machines\ict\lyelos-IPROJET\2012642\0043E-PP-Protos-924(6601)\_2.raw #11457 RT: 40.86  
 FTMS, CID@37.00, z=+2, Mono m/z=421.78632 Da, MH+=842.56536 Da, Match Tol.=0.8 Da

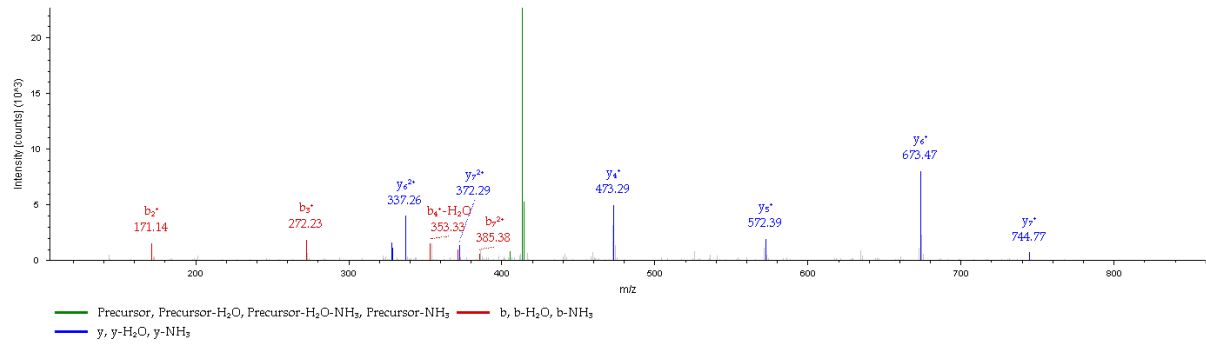

Protein references (1):

- Leucine-rich repeat-containing protein 15 OS=Homo sapiens GN=LRRC15 PE=1 SV=2 - [LRC15\_HUMAN]

Peptide Summary

Sequence: NSLTHISPR, Charge: +2, Monoisotopic m/z: 512.7600 Da (-20.39 mmu/-39.76 ppm), MH+: 1024.51272 Da, RT: 29.05 min, Identified with: Mascot (v1.30); IonScore:53, Exp Value:1.0E-003, Ions matched by search engine: 8/90  
 Fragment match tolerance used for search: 0.5 Da  
 Fragments used for search: b; b-H<sub>2</sub>O; b-NH<sub>3</sub>; y; y-H<sub>2</sub>O; y-NH<sub>3</sub>

Fragment Matches

Value Type: Theo Mass [Da]

| #1 | Neutral Losses |                                  | Seq. | Precursor Ions |                                  | #2 |
|----|----------------|----------------------------------|------|----------------|----------------------------------|----|
|    | b <sup>+</sup> | b <sup>+</sup> -H <sub>2</sub> O |      | y <sup>+</sup> | y <sup>+</sup> -H <sub>2</sub> O |    |
| 1  | 115.05021      | 58.02674                         | N    |                |                                  | 9  |
| 2  | 202.08224      | 101.54476                        | S    | 910.51052      | 455.75890                        | 8  |
| 3  | 315.16631      | 158.08679                        | L    | 823.47849      | 412.24288                        | 7  |
| 4  | 416.21399      | 208.61063                        | T    | 710.39442      | 355.70085                        | 6  |
| 5  | 553.27290      | 277.14009                        | H    | 609.34674      | 305.17701                        | 5  |
| 6  | 666.35697      | 333.66212                        | I    | 472.28783      | 236.64755                        | 4  |
| 7  | 753.36900      | 377.19814                        | S    | 359.20376      | 180.10552                        | 3  |
| 8  | 850.44177      | 425.72452                        | P    | 272.17173      | 136.58950                        | 2  |
| 9  |                |                                  | R    | 175.11896      | 88.06312                         | 1  |

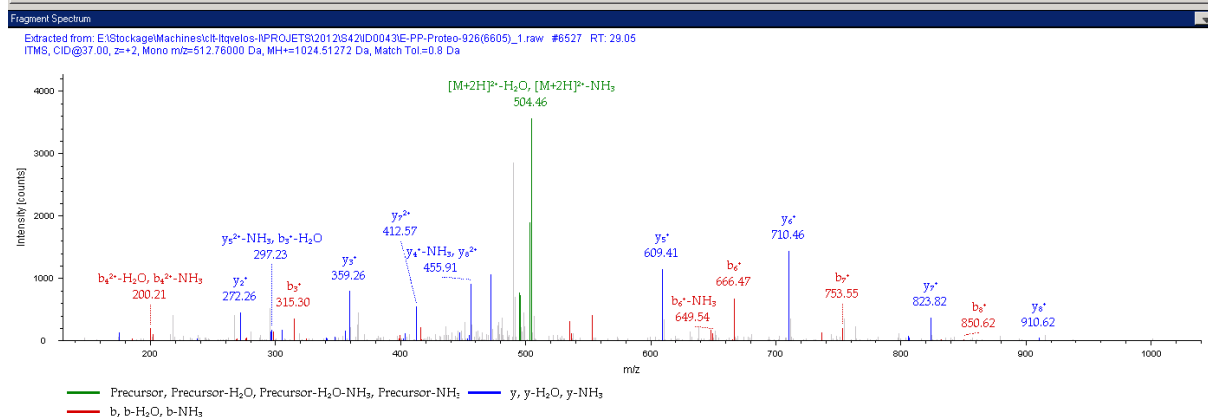

Protein references (1):

- Programmed cell death 6-interacting protein OS=Homo sapiens GN=PDC61P PE=1 SV=1 - [PDC61\_HUMAN]

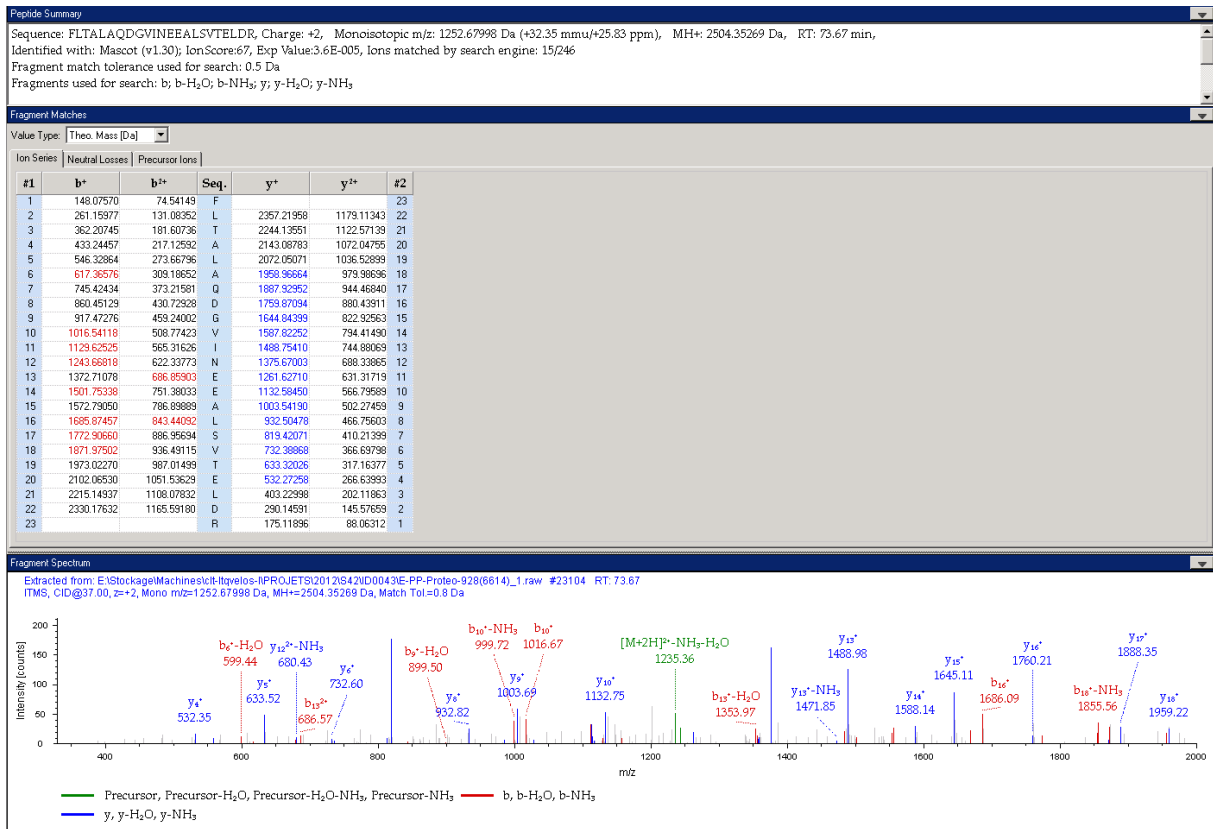

## Protein references (1):

- Cullin-5 OS=Homo sapiens GN=CUL5 PE=1 SV=4 - [CUL5\_HUMAN]

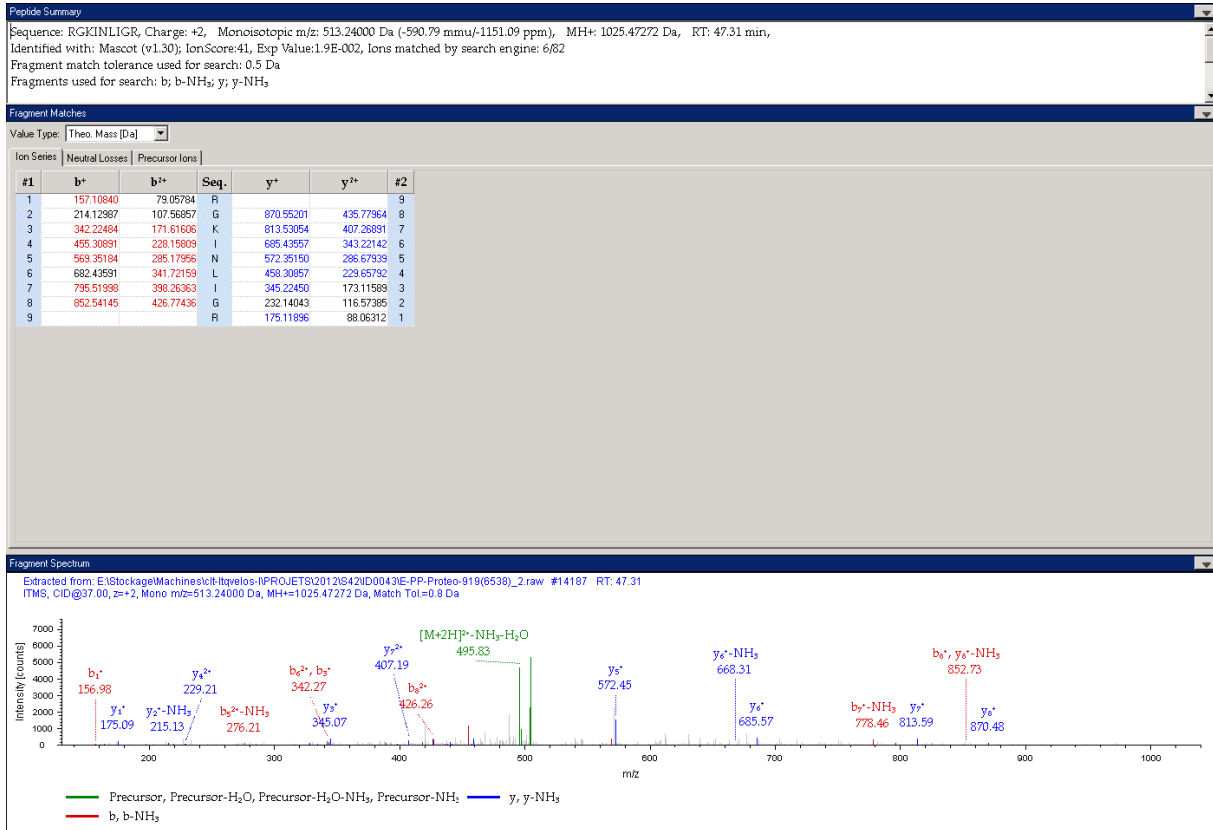

Protein references (1):

- Class E basic helix-loop-helix protein 41 OS=Homo sapiens GN=BHLHE41 PE=2 SV=1 - [BHE41\_HUMAN]

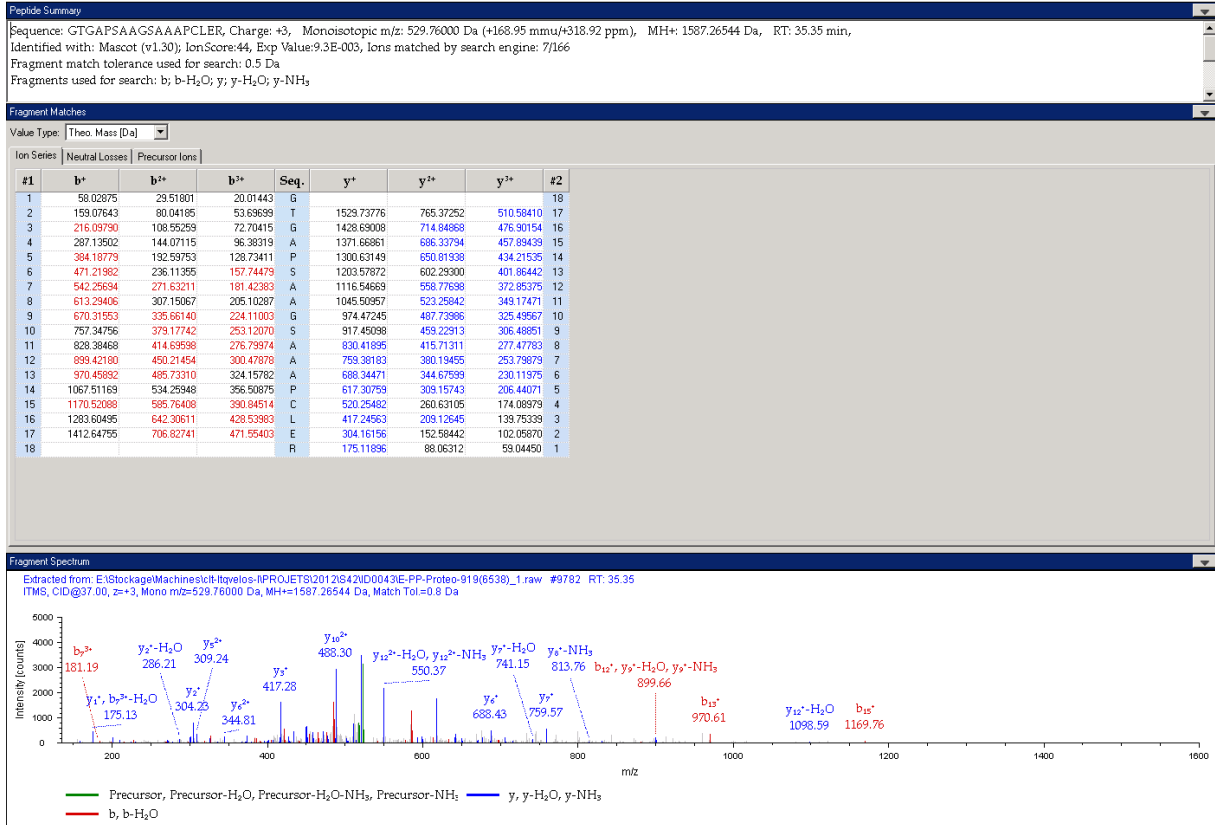

Protein references (1):

- Nuclear speckle splicing regulatory protein 1 OS=Homo sapiens GN=NSRP1 PE=1 SV=1 - [NSRP1\_HUMAN]

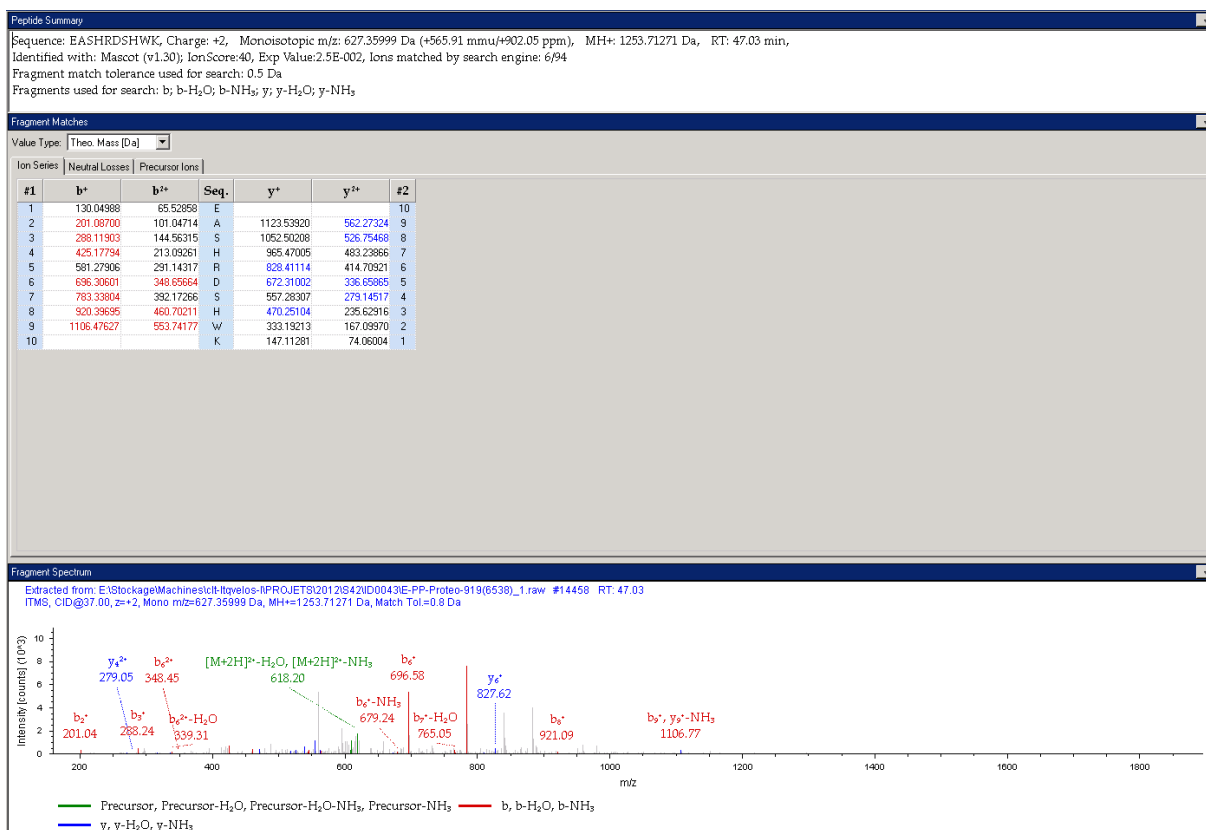

Protein references (1):

- Myosin light chain kinase 2, skeletal/cardiac muscle OS=Homo sapiens GN=MYLK2 PE=1 SV=3 - [MYLK2\_HUMAN]

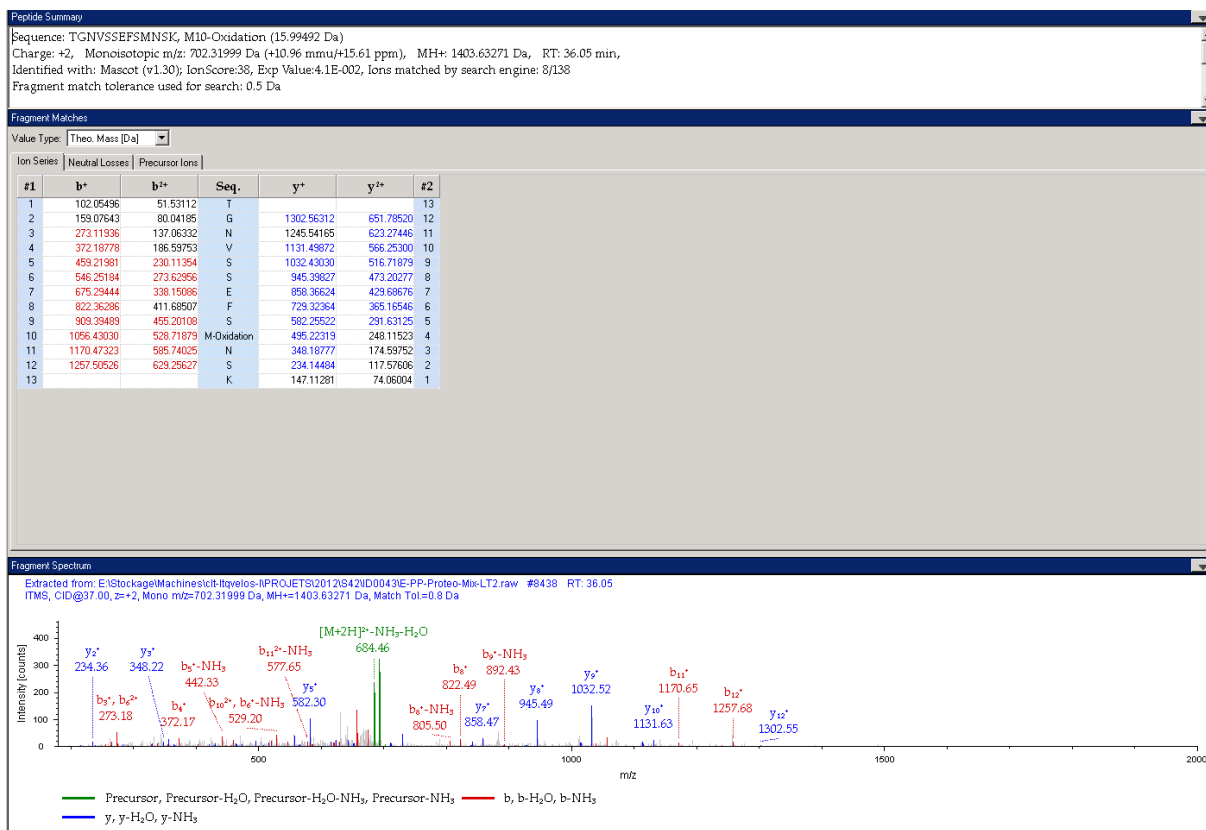



Protein references (1):

- Armadillo repeat-containing protein 7 OS=Homo sapiens GN=ARMC7 PE=1 SV=1 - [ARMC7\_HUMAN]

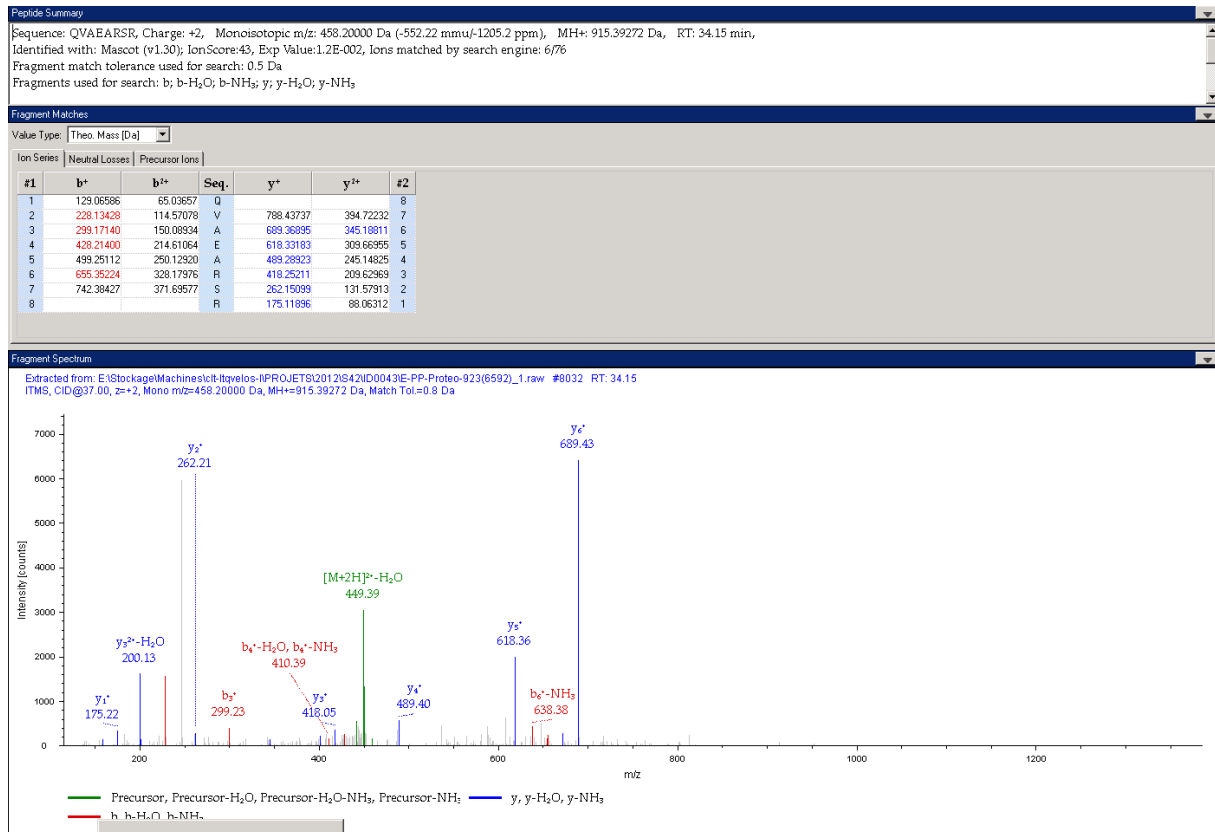

Protein references (1):

- HERV-K\_16p3.3 provirus ancestral Env polyprotein OS=Homo sapiens PE=2 SV=2 - [ENK14\_HUMAN]

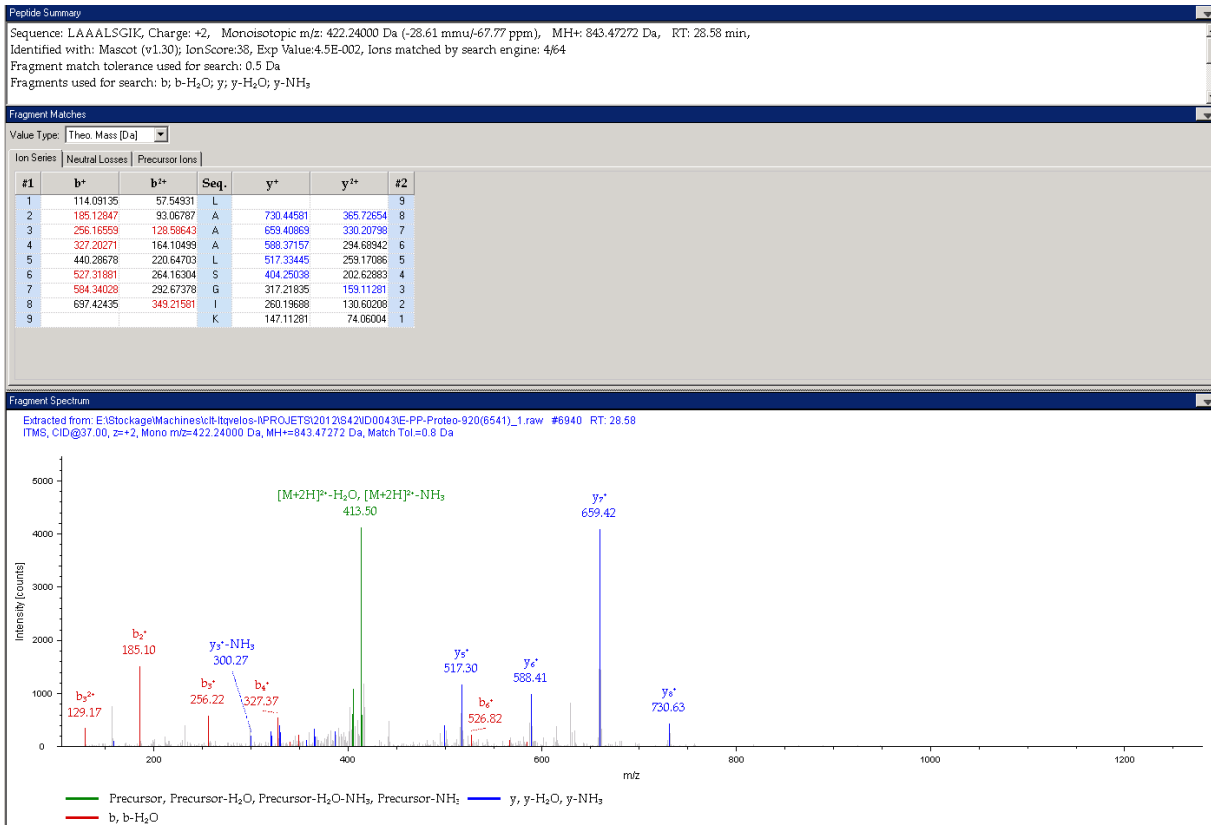

Protein references (1):

- Inactive phospholipase C-like protein 2 OS=Homo sapiens GN=PLCL2 PE=1 SV=2 - [PLCL2\_HUMAN]

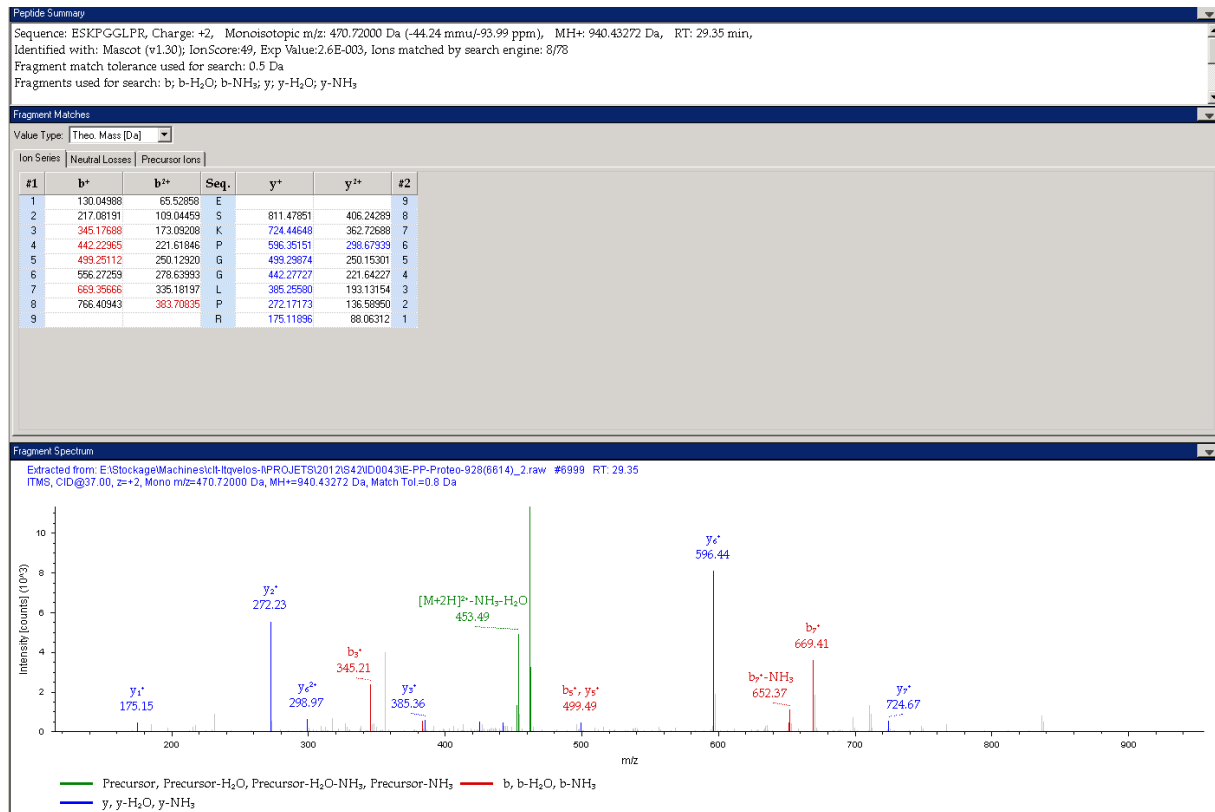

Protein references (1):

- Cofilin-1 OS=Homo sapiens GN=CFL1 PE=1 SV=3 - [COF1\_HUMAN]

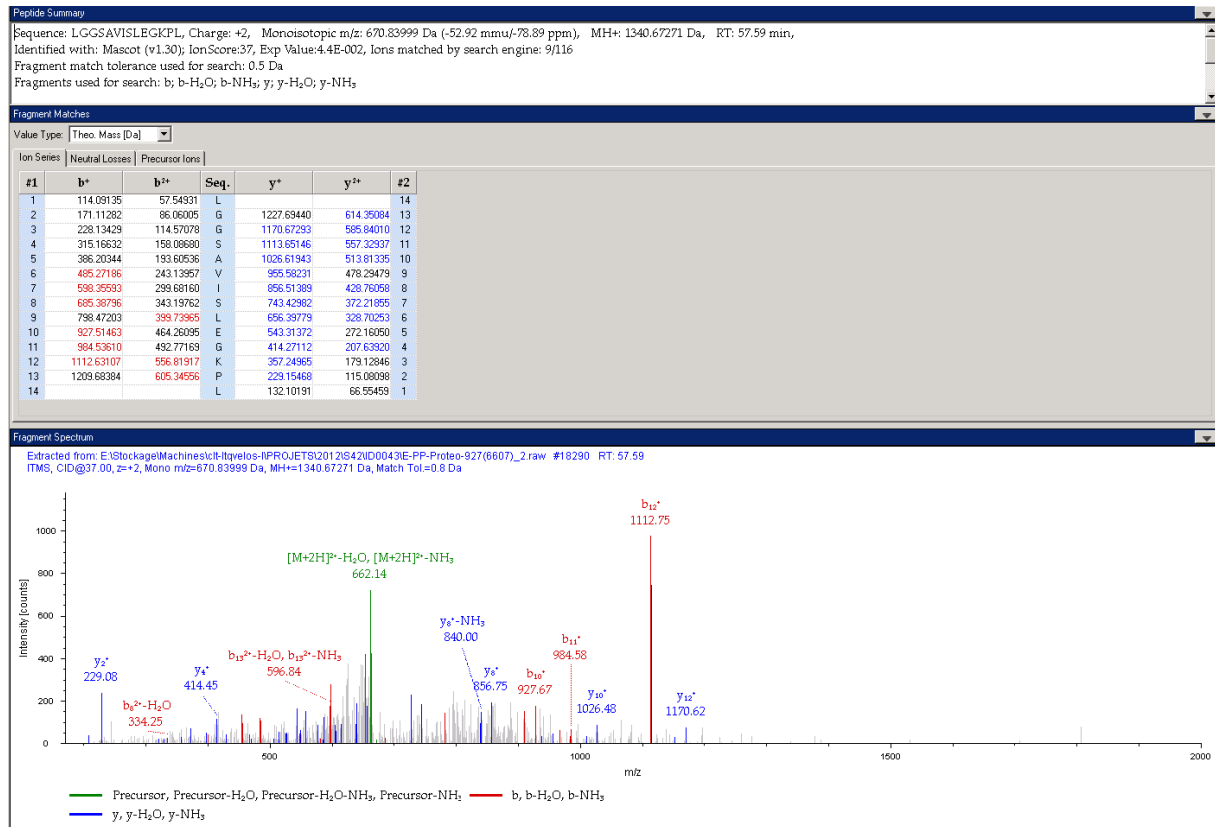

Protein references (4):

- Hsc70-interacting protein OS=Homo sapiens GN=ST13 PE=1 SV=2 - [F10A1\_HUMAN]

Peptide Summary  
 Sequence: VAAIEALNDGELQK, Charge: +2, Monoisotopic m/z: 735.91999 Da (+26.41 mmu/435.88 ppm), MH+: 1470.83271 Da, RT: 48.65 min,  
 Identified with: Mascot (v1.27), IonScore:75, Exp Value:2.7E-005, Ions matched by search engine: 16/128  
 Fragment match tolerance used for search: 0.5 Da  
 Fragments used for search: b, b-H<sub>2</sub>O; b-NH<sub>3</sub>; y, y-H<sub>2</sub>O; y-NH<sub>3</sub>

Fragment Matches

Value Type: Theo. Mass [Da]

| Ion Series | Neutral Losses | Precursor Ions |      |            |           |    |
|------------|----------------|----------------|------|------------|-----------|----|
| #1         | b*             | b**            | Seq. | y*         | y**       | #2 |
| 1          | 100.07570      | 50.54149       | V    |            |           | 14 |
| 2          | 171.11282      | 86.06005       | A    | 1371.71151 | 686.35939 | 13 |
| 3          | 242.14994      | 121.57861      | A    | 1300.67439 | 650.84083 | 12 |
| 4          | 355.23401      | 178.12064      | I    | 1225.63727 | 615.32227 | 11 |
| 5          | 484.27061      | 242.84194      | E    | 1118.55200 | 558.78024 | 10 |
| 6          | 555.31373      | 278.16260      | A    | 987.51060  | 494.25894 | 9  |
| 7          | 658.39780      | 334.70254      | L    | 916.47348  | 458.74038 | 8  |
| 8          | 782.44073      | 391.72400      | N    | 803.38941  | 402.19834 | 7  |
| 9          | 897.46768      | 449.23748      | D    | 689.34648  | 345.17688 | 6  |
| 10         | 954.48915      | 477.74821      | G    | 574.31953  | 287.66340 | 5  |
| 11         | 1083.53175     | 542.26951      | E    | 517.29806  | 259.15267 | 4  |
| 12         | 1196.61582     | 598.81155      | L    | 388.25546  | 194.63137 | 3  |
| 13         | 1324.67440     | 662.84084      | Q    | 275.17139  | 138.08933 | 2  |
| 14         |                |                | K    | 147.11281  | 74.06004  | 1  |

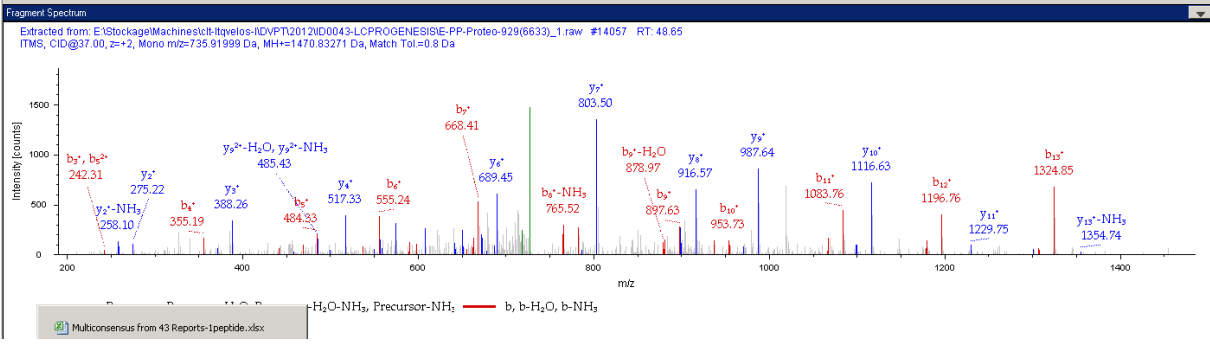

## Protein references (2):

- BUD13 homolog OS=Homo sapiens GN=BUD13 PE=1 SV=1 - [BUD13\_HUMAN]

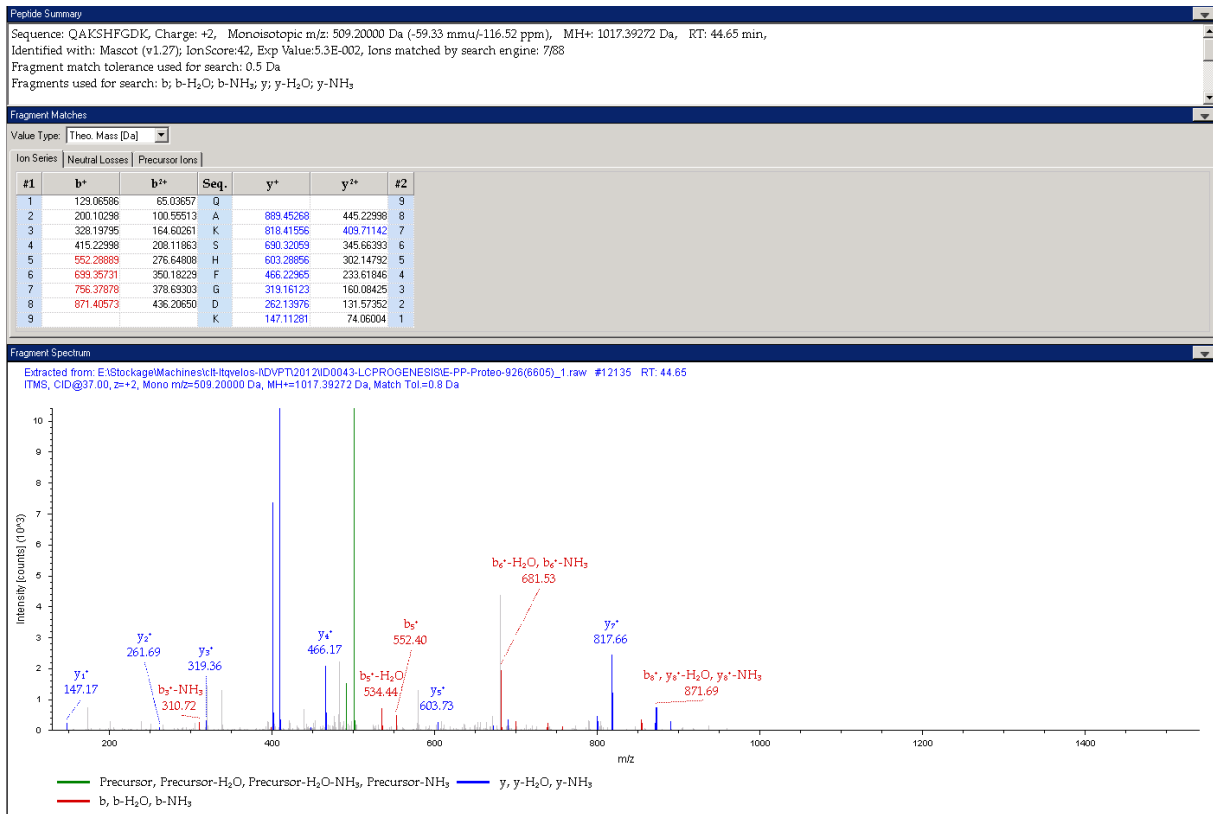

Protein references (2):

- Dermcidin OS=Homo sapiens GN=DCD PE=1 SV=2 - [DCD\_HUMAN]

Peptide Summary

Sequence: ENAGEDPGLAR, Charge: +2, Monoisotopic m/z: 564.89240 Da (+124.84 mmu/+220.99 ppm), MH+: 1128.77751 Da, RT: 26.57 min, Identified with: Mascot (v1.27), IonScore:47, Exp Value:1.8E-002, Ions matched by search engine: 10/108  
 Fragment match tolerance used for search: 0.5 Da  
 Fragments used for search: b; b-H<sub>2</sub>O; b-NH<sub>2</sub>; y; y-H<sub>2</sub>O; y-NH<sub>2</sub>

Fragment Matches

Value Type: Theo. Mass [Da]

| Ion Series | Neutral Losses | Precursor Ions | #1 | b <sup>+</sup> | b <sup>+</sup> | Seq. | y <sup>+</sup> | y <sup>+</sup> | #2 |
|------------|----------------|----------------|----|----------------|----------------|------|----------------|----------------|----|
| 1          |                |                | 1  | 130.04388      | 65.52858       | E    |                |                | 11 |
| 2          |                |                | 2  | 244.09291      | 122.55004      | N    | 939.48546      | 500.24637      | 10 |
| 3          |                |                | 3  | 315.12993      | 158.06860      | A    | 885.44253      | 443.22490      | 9  |
| 4          |                |                | 4  | 372.15140      | 186.57934      | G    | 814.40541      | 407.70634      | 8  |
| 5          |                |                | 5  | 501.19400      | 251.10064      | E    | 757.38394      | 379.19561      | 7  |
| 6          |                |                | 6  | 616.22095      | 308.61411      | D    | 628.34134      | 314.67431      | 6  |
| 7          |                |                | 7  | 713.27372      | 357.14050      | P    | 513.31439      | 257.16083      | 5  |
| 8          |                |                | 8  | 770.29519      | 385.65123      | G    | 416.26162      | 208.63445      | 4  |
| 9          |                |                | 9  | 883.37926      | 442.19327      | L    | 359.24015      | 180.12371      | 3  |
| 10         |                |                | 10 | 954.41638      | 477.71183      | A    | 246.15608      | 123.58168      | 2  |
| 11         |                |                | 11 |                |                | R    | 175.11896      | 88.06312       | 1  |

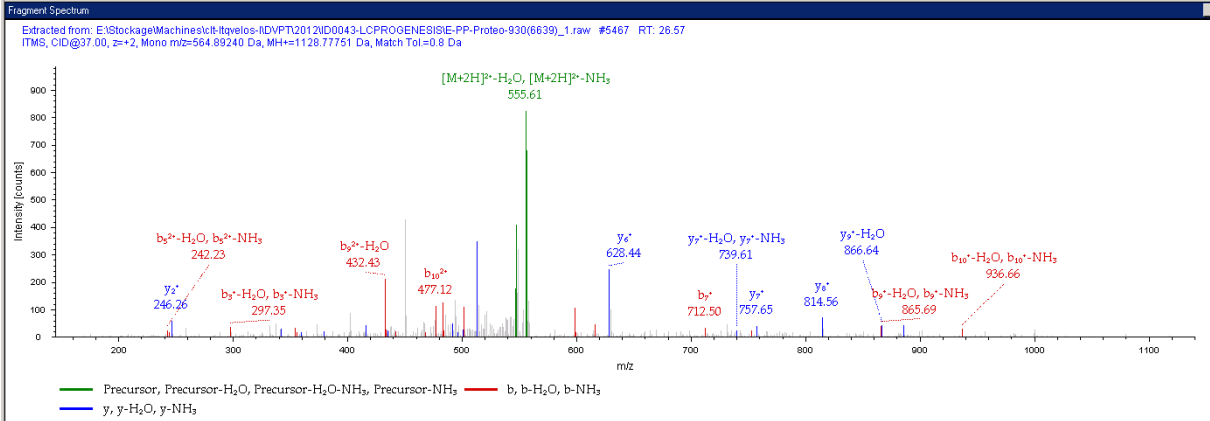

Protein references (2):

- Transmembrane protein 198 OS=Homo sapiens GN=TMEM198 PE=2 SV=1 - [TM198\_HUMAN]

Peptide Summary  
 Sequence: MFGTVATLR, Charge: +2, Monoisotopic m/z: 473.28000 Da (+17.04 mmu/+36.01 ppm), MH+: 945.55272 Da, RT: 40.87 min,  
 Identified with: Mascot (v1.27), IonScore:43, Exp Value:4.3E-002, Ions matched by search engine: 8/70  
 Fragment match tolerance used for search: 0.5 Da  
 Fragments used for search: b, b-H<sub>2</sub>O; y, y-H<sub>2</sub>O; y-NH<sub>3</sub>

Fragment Matches

Value Type: [Theo. Mass [Da]]

| Ion Series | Neutral Losses | Precursor Ions |      |                |                |    |
|------------|----------------|----------------|------|----------------|----------------|----|
| #1         | b <sup>+</sup> | b <sup>+</sup> | Seq. | y <sup>+</sup> | y <sup>+</sup> | #2 |
| 1          | 132.04778      | 66.52753       | M    |                |                | 8  |
| 2          | 229.10055      | 115.05391      | P    | 814.47817      | 407.74272      | 8  |
| 3          | 286.12202      | 143.56455      | G    | 717.42540      | 359.21634      | 7  |
| 4          | 387.16970      | 194.08849      | T    | 660.40393      | 330.70960      | 6  |
| 5          | 486.23912      | 243.62270      | V    | 559.39625      | 280.18176      | 5  |
| 6          | 557.27524      | 279.14126      | A    | 460.28783      | 230.64755      | 4  |
| 7          | 658.32292      | 329.66510      | T    | 389.25071      | 195.12899      | 3  |
| 8          | 771.40689      | 386.20713      | L    | 288.20303      | 144.60515      | 2  |
| 9          |                |                | R    | 175.11896      | 88.06312       | 1  |

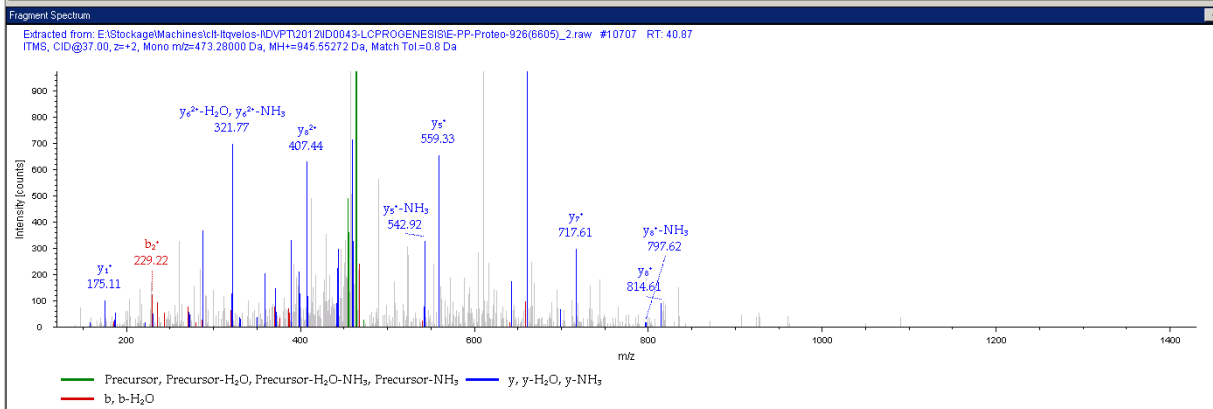



Protein references (1):

- Telomeric repeat-binding factor 2 (Fragment) OS=Homo sapiens GN=TERF2 PE=4 SV=2 - [H3BR37\_HUMAN]

Peptide Summary

Sequence: XAERGAGEAR, XI-MappingF (147.06842 Da)  
 Charge: +2, Monoisotopic m/z: 531.72000 Da (-548.16 mmu/-1030.92 ppm), MH+: 1062.43272 Da, RT: 41.03 min,  
 Identified with: Mascot (v1.27); IonScore:43, Exp Value:4.8E-002, Ions matched by search engine: 9/94  
 Fragment match tolerance used for search: 0.5 Da

Fragment Matches

Value Type: Theo. Mass [Da]

| Ion Series | Neutral Losses | Precursor Ions | Seq. | y*        | y2*       | #2 |
|------------|----------------|----------------|------|-----------|-----------|----|
| 1          | 148.07570      | 74.54149       | XF   |           |           | 10 |
| 2          | 219.11282      | 110.06005      | A    | 916.45958 | 458.73343 | 9  |
| 3          | 348.15542      | 174.58135      | E    | 845.42246 | 423.21487 | 8  |
| 4          | 504.25654      | 252.63191      | R    | 716.37886 | 358.69357 | 7  |
| 5          | 561.27801      | 281.14264      | G    | 560.27874 | 280.64301 | 6  |
| 6          | 632.31513      | 316.66120      | A    | 903.25727 | 252.13227 | 5  |
| 7          | 689.33660      | 345.17194      | G    | 432.22015 | 216.61371 | 4  |
| 8          | 818.37920      | 409.69324      | E    | 375.19868 | 188.10298 | 3  |
| 9          | 889.41632      | 445.21180      | A    | 246.15608 | 123.58168 | 2  |
| 10         |                |                | R    | 175.11896 | 88.06312  | 1  |

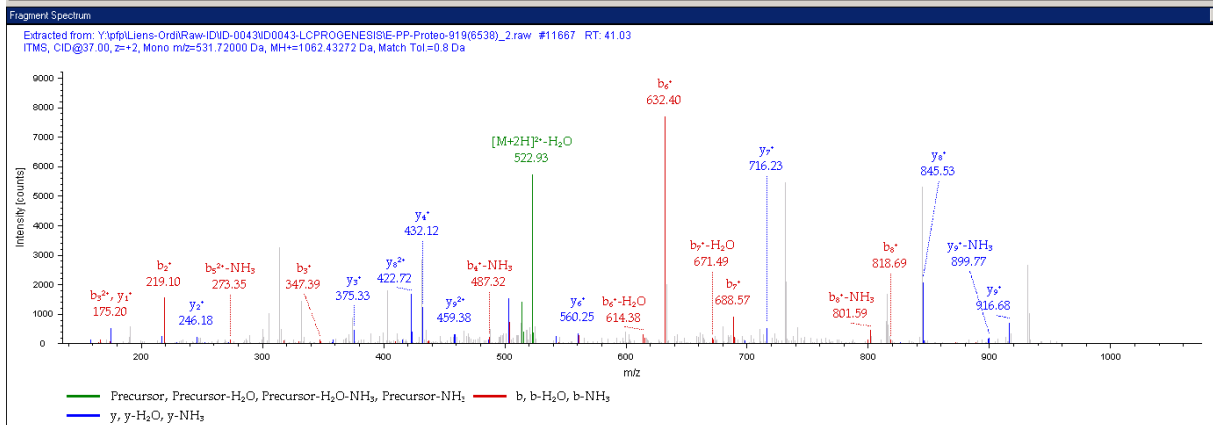

Protein references (4):

- Ferritin heavy chain OS=Homo sapiens GN=FTH1 PE=1 SV=2 - [FRIH\_HUMAN]

Peptide Summary

Sequence: NVNQSLELLEHK, Charge: +2, Monoisotopic m/z: 647.79999 Da (-59.4 mmu/-91.7 ppm), MH+: 1294.59271 Da, RT: 42.55 min, Identified with: Mascot (v1.27), IonScore: 52, Exp Value: 5.2E-03, Ions matched by search engine: 8/106, Fragment match tolerance used for search: 0.5 Da, Fragments used for search: b, b-H<sub>2</sub>O, b-NH<sub>2</sub>, y, y-H<sub>2</sub>O, y-NH<sub>2</sub>

Fragment Matches

Value Type: [Theo. Mass (Da)]

| Ion Series | Neutral Losses | Precursor Ions |      |            |           |    |
|------------|----------------|----------------|------|------------|-----------|----|
| #1         | b*             | b**            | Seq. | y*         | y**       | #2 |
| 1          | 115.05021      | 58.02674       | N    |            |           | 11 |
| 2          | 214.11983      | 107.56295      | V    | 1180.68849 | 590.63796 | 10 |
| 3          | 328.16156      | 164.58442      | N    | 1081.60007 | 541.30367 | 9  |
| 4          | 456.22014      | 228.61371      | Q    | 967.55714  | 484.28221 | 8  |
| 5          | 543.25217      | 272.12972      | S    | 839.43656  | 420.25242 | 7  |
| 6          | 656.33624      | 328.67176      | L    | 752.45652  | 376.73690 | 6  |
| 7          | 769.42031      | 385.21378      | L    | 639.36246  | 323.19487 | 5  |
| 8          | 898.46291      | 449.72609      | E    | 526.23039  | 263.65280 | 4  |
| 9          | 1011.54630     | 506.27713      | L    | 397.25579  | 199.13152 | 3  |
| 10         | 1148.60569     | 574.60289      | H    | 284.17172  | 142.58950 | 2  |
| 11         |                |                | K    | 147.11281  | 74.05004  | 1  |

Fragment Spectrum

Extracted from: Y:\MS\Library\Raw\IDID-6043\ID6043-LC\PROTEOMISSE-PP\Fth1-021(6568)\_1.raw #12288 RT: 42.55  
 ITMS, CD@37.00, z=+2, Mono m/z=647.79999 Da, MH+=1294.59271 Da, Match Tol=0.5 Da

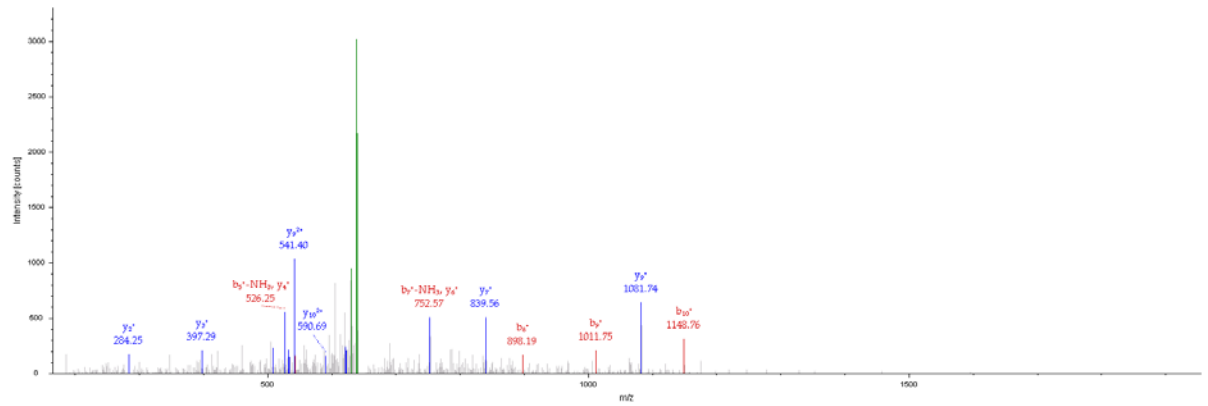

Protein references (5):

- Decorin OS=Homo sapiens GN=DCN PE=1 SV=1 - [PGS2\_HUMAN]

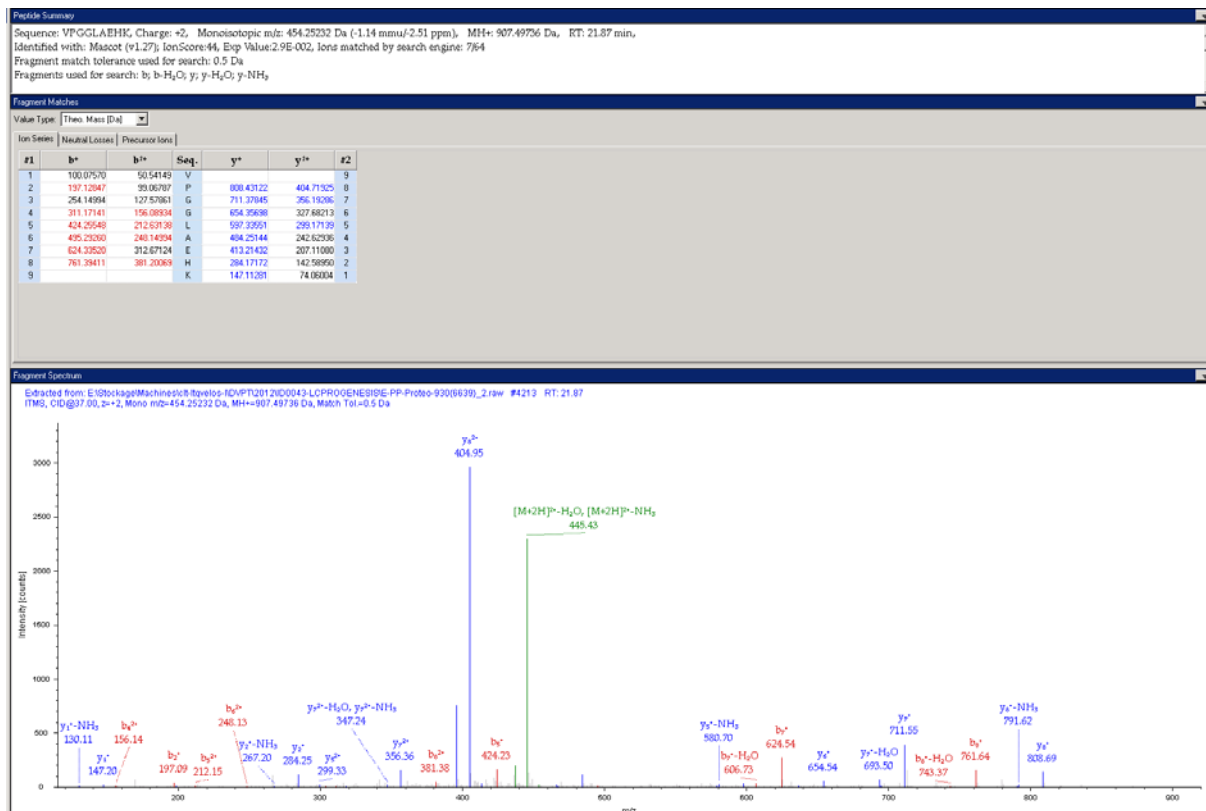

Protein references (4):

- 14-3-3 protein beta/alpha OS=Homo sapiens GN=YWHAB PE=1 SV=3 - [1433B\_HUMAN]

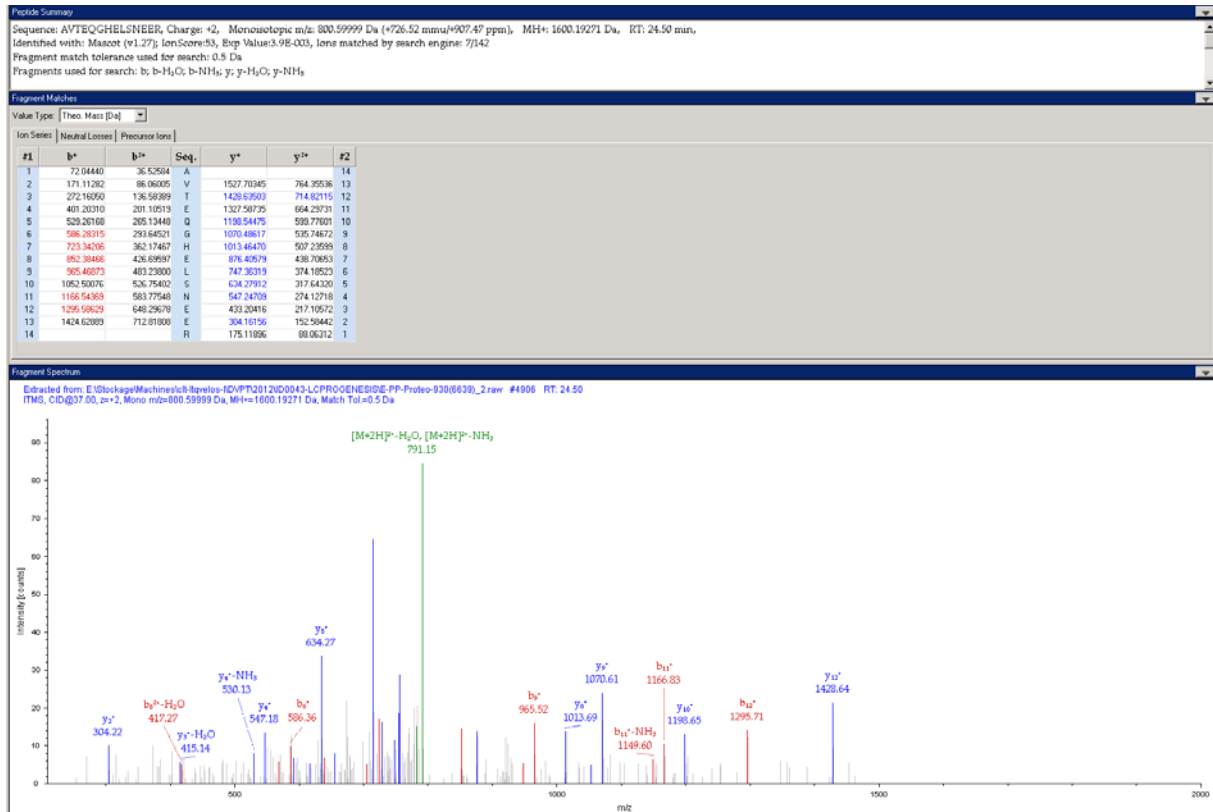

Protein references (1):

- Complement component C9 OS=Homo sapiens GN=C9 PE=1 SV=2 - [CO9\_HUMAN]

Peptide Summary

Sequence: AIEDYINEFSVR, Charge: +2, Monoisotopic m/z: 728.11999 Da (-239.56 mmu/-329.01 ppm), MH+: 1455.23271 Da, RT: 63.01 min.  
 Identified with: Mascot (v1.27); IonScore: 63, Exp Value: 3.5E-004, Ions matched by search engine: 7/112  
 Fragment match tolerance used for search: 0.5 Da  
 Fragments used for search: b; b-H<sub>2</sub>O; b-NH<sub>2</sub>; y; y-H<sub>2</sub>O; y-NH<sub>2</sub>

Fragment Matches

Value Type: Theo. Mass (Da)

| Ion Series | Neutral Losses | Precursor Ions |      |                |                |    |
|------------|----------------|----------------|------|----------------|----------------|----|
| #1         | b <sup>n</sup> | b <sup>m</sup> | Seq. | y <sup>n</sup> | y <sup>m</sup> | #2 |
| 1          | 72.04440       | 36.52504       | A    |                |                | 12 |
| 2          | 185.12947      | 93.06307       | I    | 1384.67427     | 692.84082      | 11 |
| 3          | 314.17107      | 157.58917      | E    | 1271.59030     | 636.29579      | 10 |
| 4          | 429.19802      | 215.10385      | D    | 1142.54770     | 571.77749      | 9  |
| 5          | 592.26134      | 296.63431      | Y    | 1027.52075     | 514.26401      | 8  |
| 6          | 706.36541      | 353.17624      | I    | 864.46742      | 432.23226      | 7  |
| 7          | 819.38934      | 410.19391      | N    | 751.37136      | 376.18650      | 6  |
| 8          | 948.43094      | 474.71911      | E    | 637.33042      | 319.16886      | 5  |
| 9          | 1096.49936     | 548.25332      | F    | 508.26783      | 254.64796      | 4  |
| 10         | 1182.53139     | 591.76333      | S    | 361.21341      | 181.11334      | 3  |
| 11         | 1261.59991     | 641.30354      | V    | 214.16738      | 107.08373      | 2  |
| 12         |                |                | R    | 175.11896      | 88.06312       | 1  |

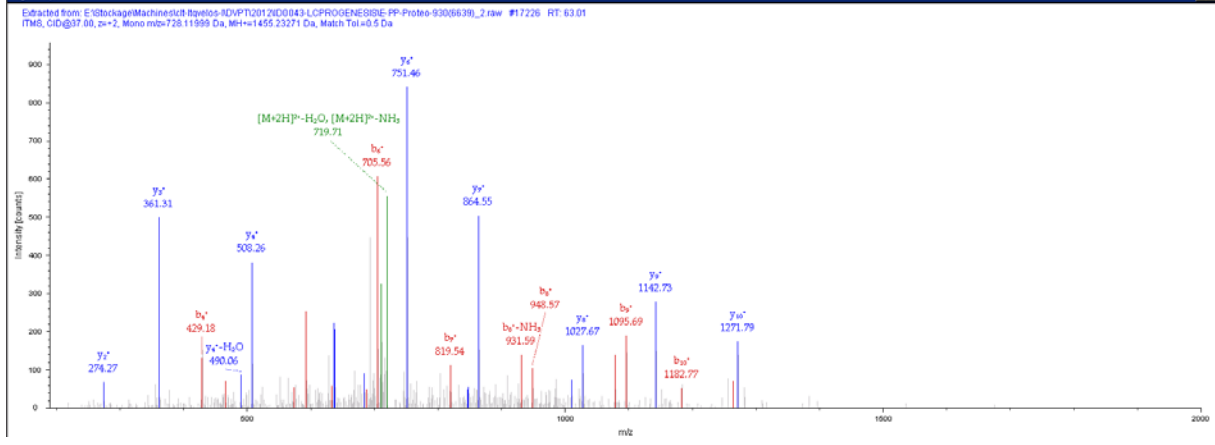

Protein references (1):

- Complement C5 OS=Homo sapiens GN=C5 PE=1 SV=4 - [CO5\_HUMAN]

**Peptide Summary**

Sequence: ALVEGVDFQLFDYQIQ, Charge: +2, Monoisotopic m/z: 920.51999 Da (+539.58 mmu/+586.49 ppm), MH+: 1840.03270 Da, RT: 72.03 min, Identified with: Mascot (v1.27), IonScore=44, Exp. Value: 2.9E-002, Ions matched by search engine: 7/152  
 Fragment match tolerance used for search: 0.5 Da  
 Fragments used for search: b; b-H<sub>2</sub>O; b-NH<sub>2</sub>; y; y-H<sub>2</sub>O; y-NH<sub>2</sub>

**Fragment Matches**

Value Type: [Theo. Mass (Da)]

| Ion Series | Neutral Losses | Peccator Ions  | Seq. | y <sup>+</sup> | y <sup>+</sup> | z2 |
|------------|----------------|----------------|------|----------------|----------------|----|
| #1         | b <sup>+</sup> | b <sup>+</sup> |      |                |                |    |
| 1          | 72.04440       | 36.52984       | A    |                |                | 16 |
| 2          | 105.12047      | 53.06787       | L    | 1767.91641     | 684.46194      | 15 |
| 3          | 204.19609      | 142.63200      | V    | 1054.63224     | 927.91391      | 14 |
| 4          | 413.22949      | 207.12398      | E    | 1555.76363     | 778.36560      | 13 |
| 5          | 470.25096      | 235.63412      | G    | 1435.72132     | 713.86430      | 12 |
| 6          | 563.32938      | 285.16833      | V    | 1369.69885     | 685.35366      | 11 |
| 7          | 684.39633      | 342.69180      | D    | 1270.63143     | 635.61395      | 10 |
| 8          | 812.41491      | 406.71105      | D    | 1155.60480     | 576.36589      | 9  |
| 9          | 925.49898      | 463.25315      | L    | 1027.54580     | 514.27659      | 8  |
| 10         | 1072.56740     | 536.78734      | F    | 914.46183      | 457.73455      | 7  |
| 11         | 1173.61608     | 587.31118      | T    | 767.38341      | 384.20034      | 6  |
| 12         | 1280.64203     | 644.62465      | D    | 666.34573      | 333.67950      | 5  |
| 13         | 1451.70535     | 725.26531      | Y    | 551.31878      | 276.16360      | 4  |
| 14         | 1574.76393     | 780.38560      | Q    | 388.25546      | 194.63137      | 3  |
| 15         | 1692.84900     | 846.52764      | I    | 260.19688      | 130.60208      | 2  |

**Fragment Spectrum**

Extracted from: E:\Stockage\Machines\Utl-Helios-4D\PT2012\DC0043-LC\PROTEIN\PP-Proteo-920\6639\_2.raw #20009 RT: 72.03  
 (IMS, CID@37.0), z=+2, Mono m/z=920.51999 Da, MH+=1840.03270 Da, Match Tol=0.5 Da

Protein references (1):

- Alcohol dehydrogenase 1B OS=Homo sapiens GN=ADH1B PE=1 SV=2 - [ADH1B\_HUMAN]

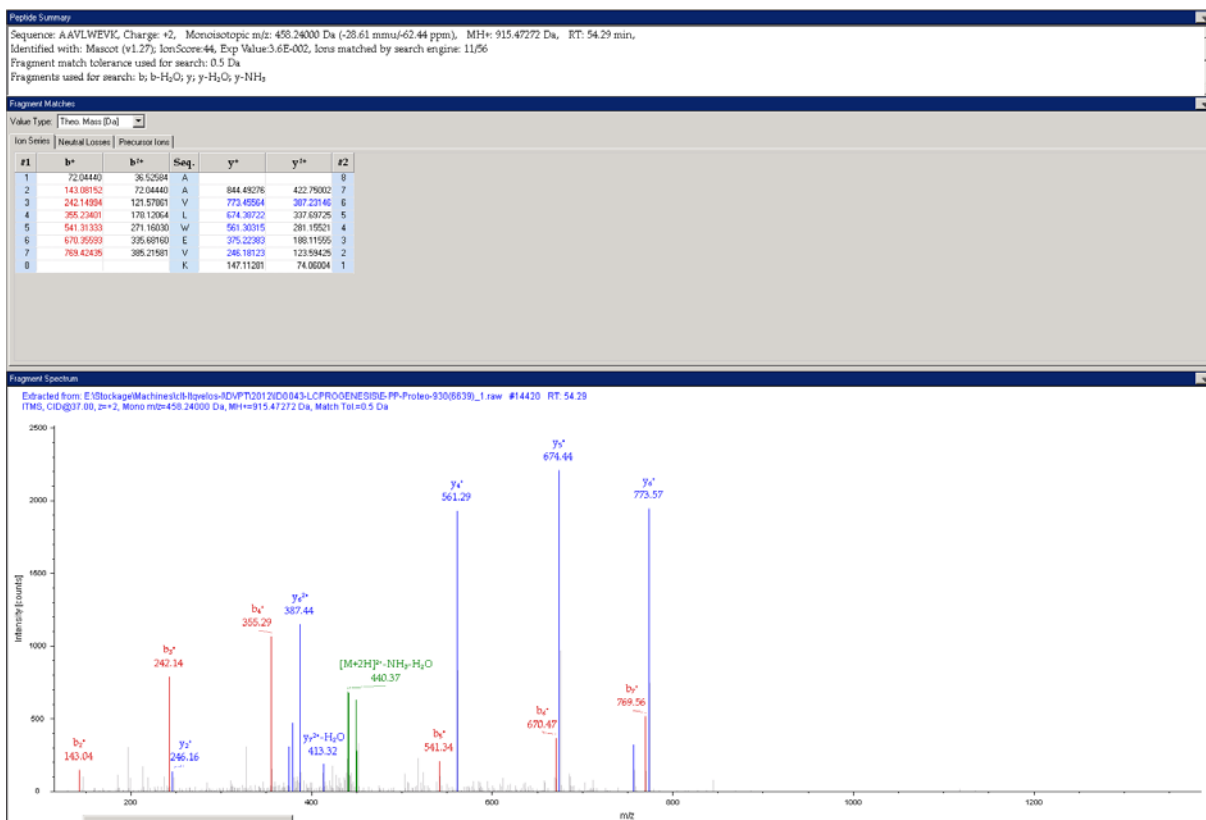

Protein references (2):

- Talin-1 OS=Homo sapiens GN=TLN1 PE=1 SV=3 - [TLN1\_HUMAN]

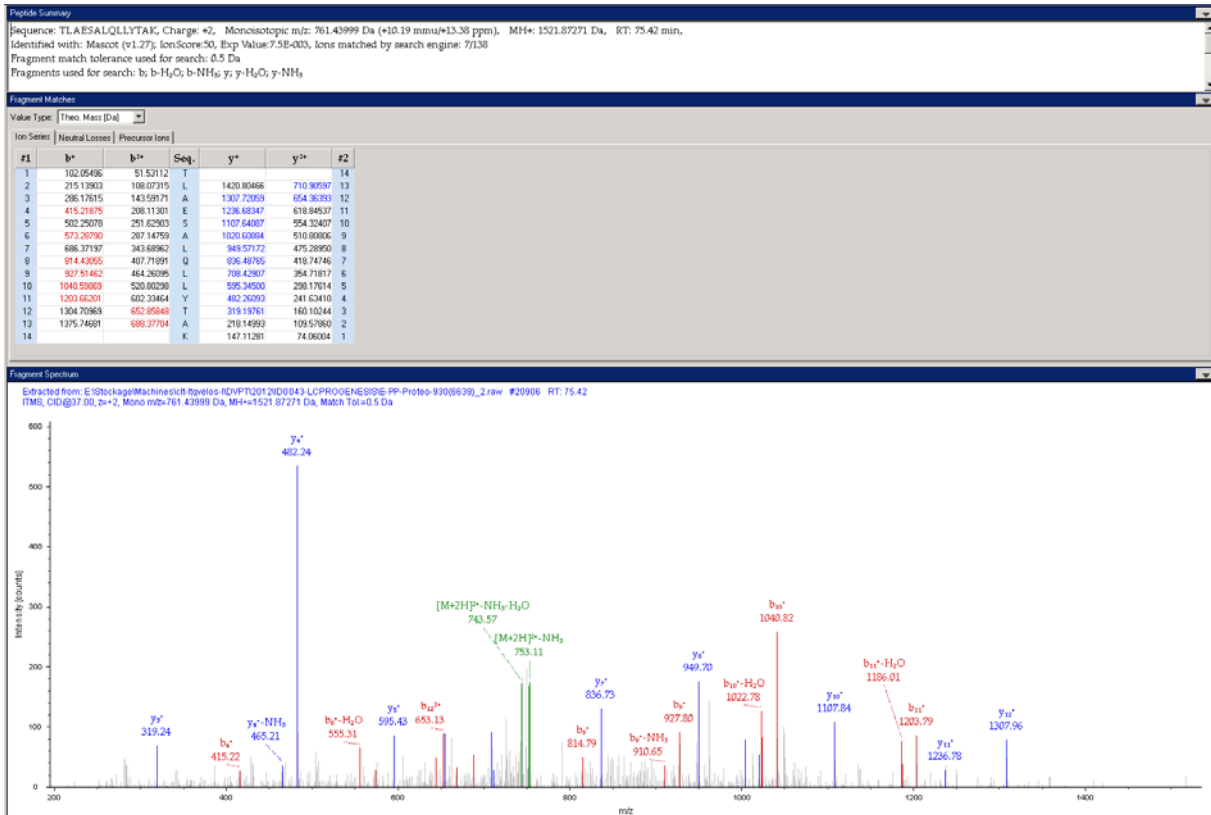



Protein references (1):

- Thyroglobulin (Fragment) OS=Homo sapiens GN=TG PE=4 SV=1 - [H0YB42\_HUMAN]

Peptide Summary

Sequence: XSA GASALLR, XI-MappingE (129.04260 Da)  
 Charge: +2, Monoisotopic m/z: 488.28000 Da (+513.59 mmu/+1051.84 ppm), MH+: 975.55272 Da, RT: 28.66 min,  
 Identified with: Mascot (v1.27), IonScore=61, Exp Value=6.8E-004, Ions matched by search engine: 6/80  
 Fragment match tolerance used for search: 0.5 Da

Fragment Matches

Value Type: Theo. Mass [Da]

| Ion Series | Neutral Losses | Precuror Ions  |    |    |
|------------|----------------|----------------|----|----|
| #1         | b <sup>+</sup> | y <sup>+</sup> | #2 |    |
| 1          | 120.04300      | 65.52959       | X4 | 10 |
| 2          | 217.08191      | 109.04459      | S  | 9  |
| 3          | 288.11903      | 144.56315      | A  | 8  |
| 4          | 385.14750      | 173.07389      | G  | 7  |
| 5          | 416.17782      | 208.85345      | A  | 6  |
| 6          | 503.20985      | 252.10046      | S  | 5  |
| 7          | 574.24077      | 287.62702      | A  | 4  |
| 8          | 607.23004      | 344.16306      | L  | 3  |
| 9          | 800.41491      | 400.71105      | L  | 2  |
| 10         |                |                | R  | 1  |

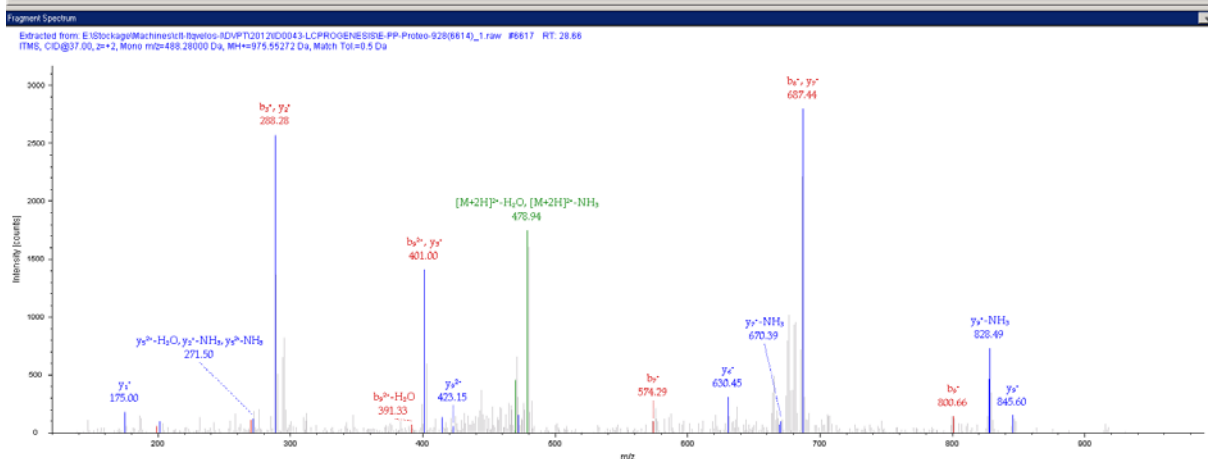

Protein references (1):

- N-glycosylase/DNA lyase (Fragment) OS=Homo sapiens GN=OGG1 PE=4 SV=1 - [H7C0A1\_HUMAN]

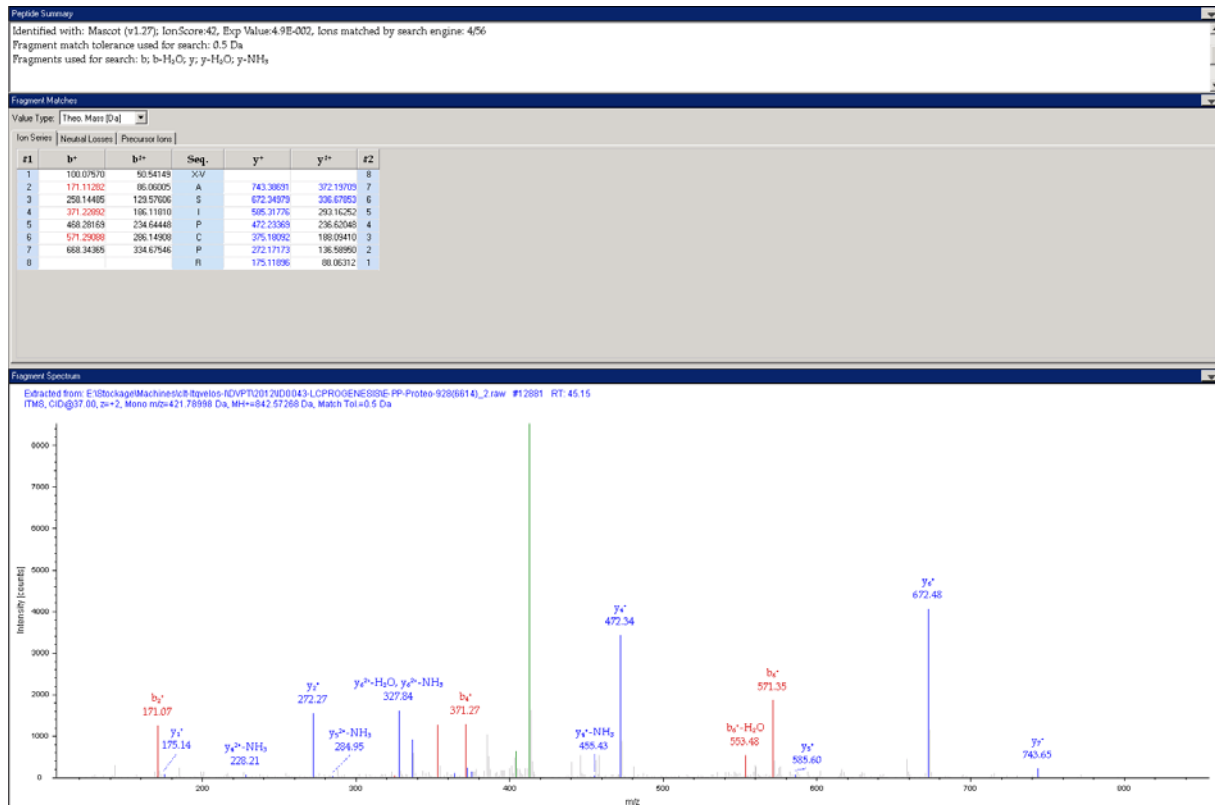

Protein references (1):

- Isoform 2 of Tudor domain-containing protein 10 OS=Homo sapiens GN=TDRD10 - [TDR10\_HUMAN]

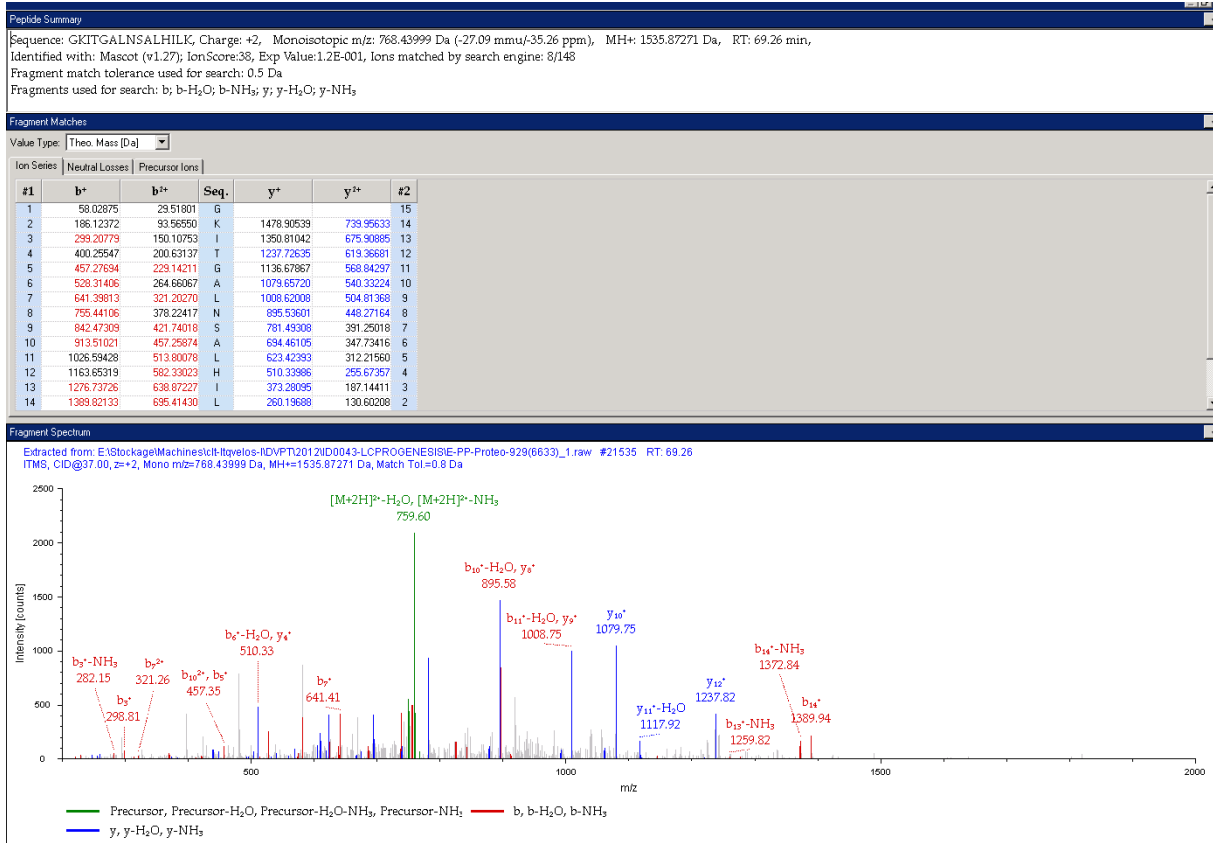

Protein references (1):

- Lysine-specific demethylase 4D OS=Homo sapiens GN=KDM4D PE=1 SV=3 - [KDM4D\_HUMAN]

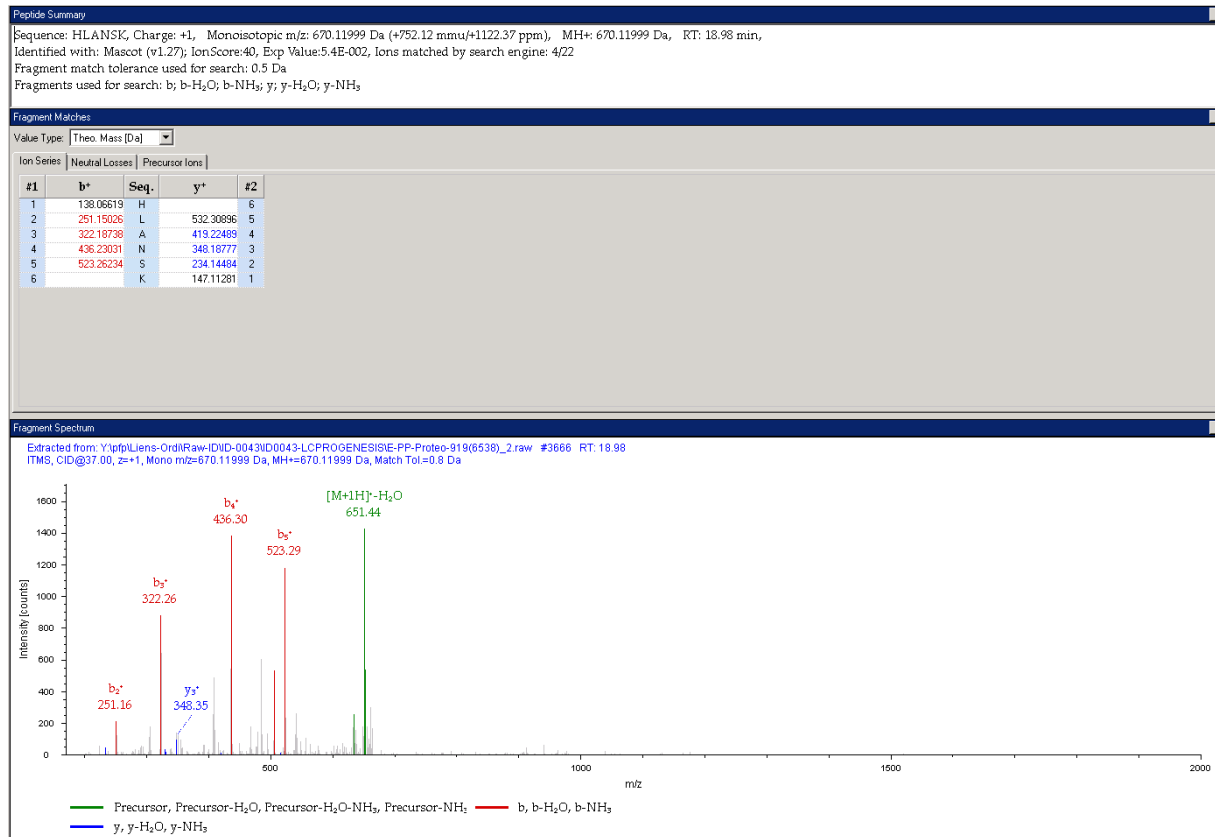

Protein references (2):

- Plastin-2 OS=Homo sapiens GN=LCP1 PE=1 SV=6 - [PLSL\_HUMAN]

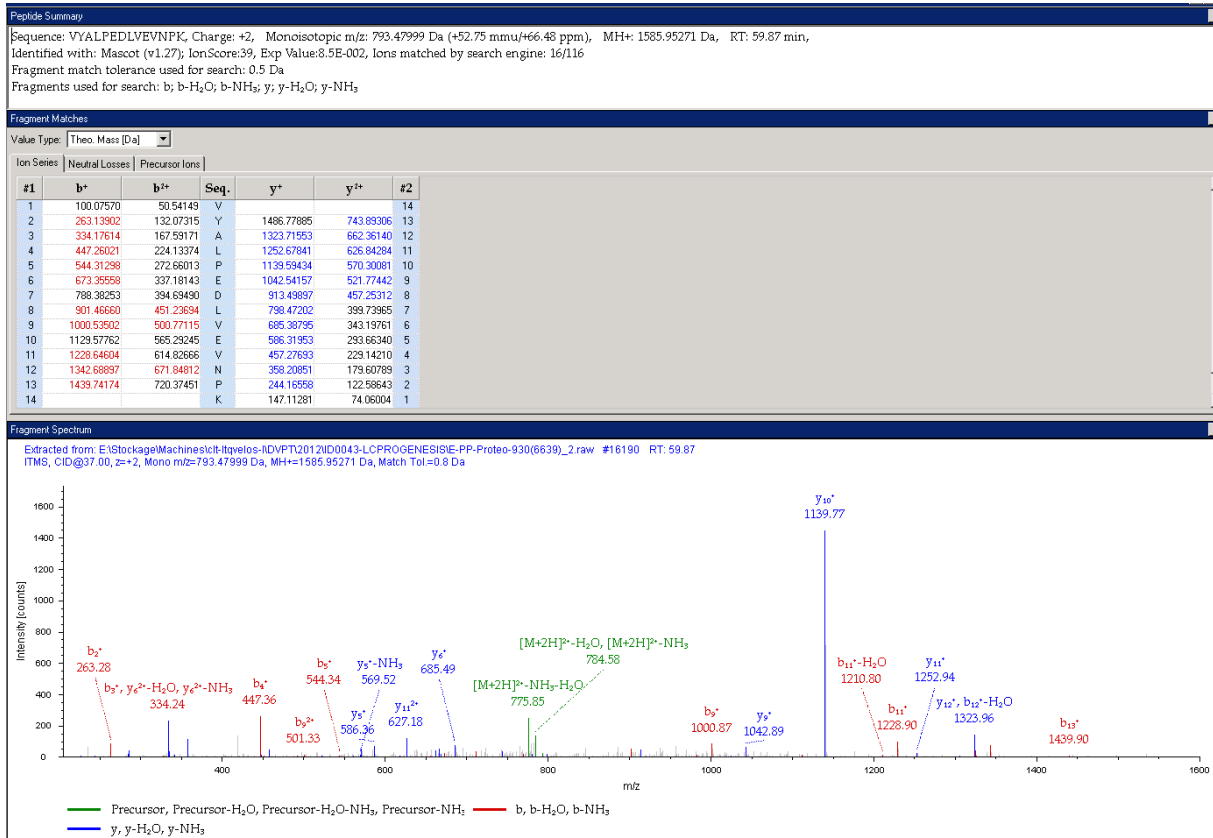

Protein references (3):

- Lysyl-bradykinin OS=Homo sapiens GN=KNG1 PE=4 SV=1 - [C9JEX1\_HUMAN]

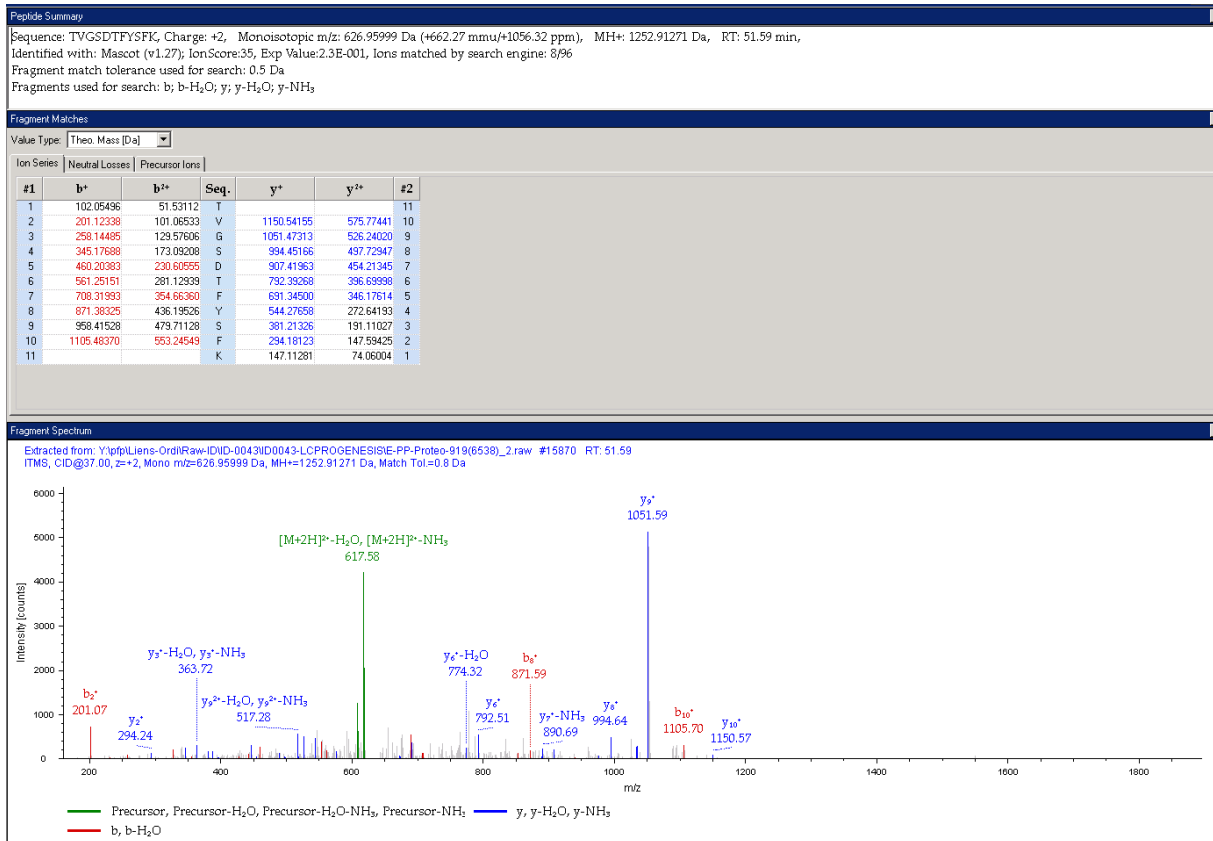

Protein references (1):

- Tetranectin OS=Homo sapiens GN=CLEC3B PE=4 SV=1 - [E9PHK0\_HUMAN]

Peptide Summary

Sequence: FEELKSR, Charge: +2, Monoisotopic m/z: 454.30283 Da (-443.13 mmu/-975.41 ppm), MH+: 907.59838 Da, RT: 43.42 min, Identified with: Mascot (v1.27); IonScore:37, Exp Value:1.4E-001, Ions matched by search engine: 5/60  
 Fragment match tolerance used for search: 0.5 Da  
 Fragments used for search: b; b-H<sub>2</sub>O; b-NH<sub>3</sub>; y; y-H<sub>2</sub>O; y-NH<sub>3</sub>

Fragment Matches

Value Type: Theo. Mass [Da]

| #1 | Neutral Losses |                | Precursor Ions |                | Seq <sub>1</sub> | y <sup>+</sup> | y <sup>+</sup> | #2 |
|----|----------------|----------------|----------------|----------------|------------------|----------------|----------------|----|
|    | b <sup>+</sup> | b <sup>+</sup> | b <sup>+</sup> | b <sup>+</sup> |                  |                |                |    |
| 1  | 148.07570      | 74.54149       | F              |                |                  |                |                | 7  |
| 2  | 277.11830      | 139.06279      | E              |                |                  | 761.41523      | 381.21125      | 6  |
| 3  | 406.16090      | 203.58409      | E              |                |                  | 632.37263      | 316.68955      | 5  |
| 4  | 519.24497      | 260.12612      | L              |                |                  | 503.33003      | 252.16865      | 4  |
| 5  | 647.33994      | 324.17361      | K              |                |                  | 390.24596      | 195.62662      | 3  |
| 6  | 734.37197      | 367.68962      | S              |                |                  | 262.15099      | 131.57913      | 2  |
| 7  |                |                | R              |                |                  | 175.11896      | 88.06312       | 1  |

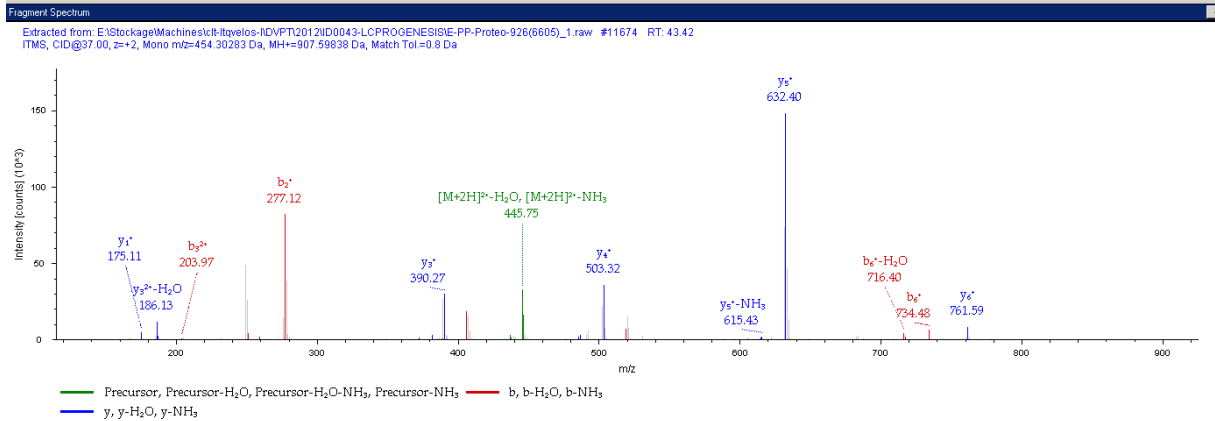

Protein references (1):

- Centrosomal protein of 192 kDa (Fragment) OS=Homo sapiens GN=CEP192 PE=4 SV=1 - [H0Y9P3\_HUMAN]

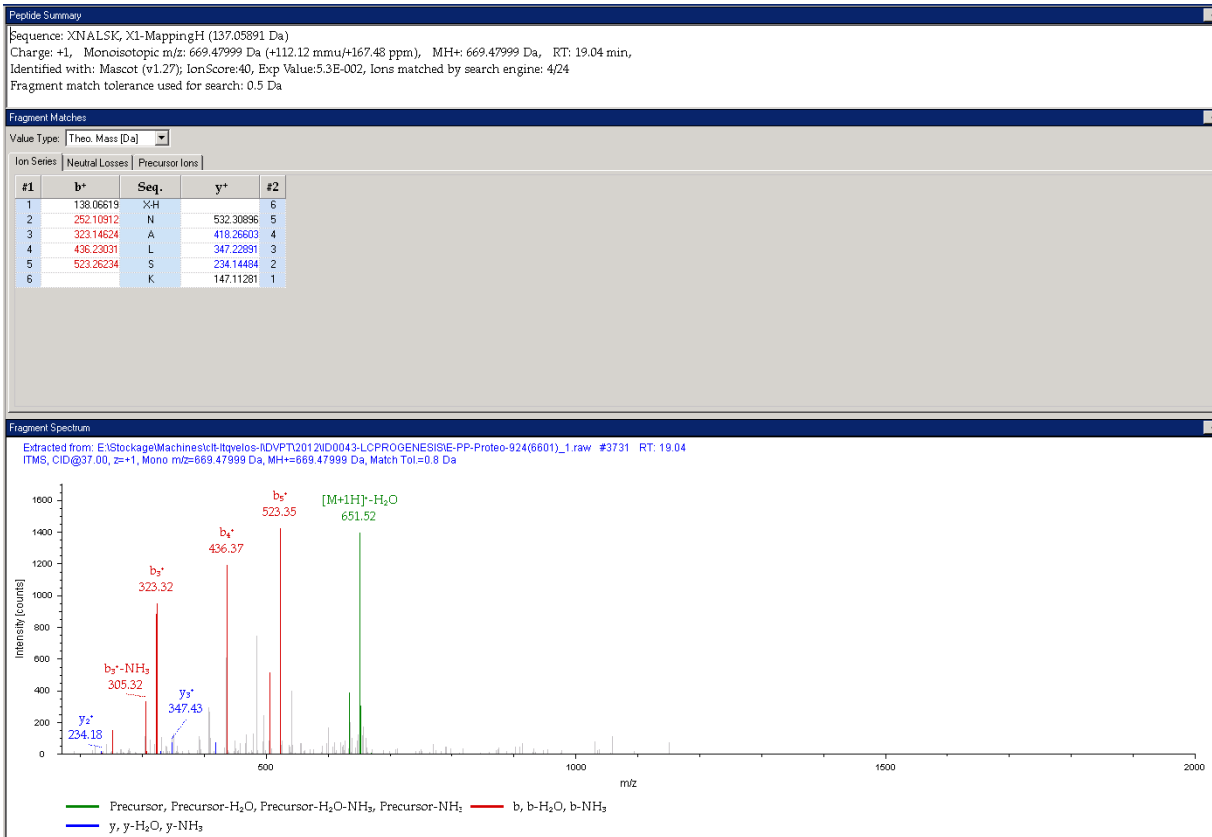



Protein references (9):

- Myosin-1 OS=Homo sapiens GN=MYH1 PE=1 SV=3 - [MYH1\_HUMAN]

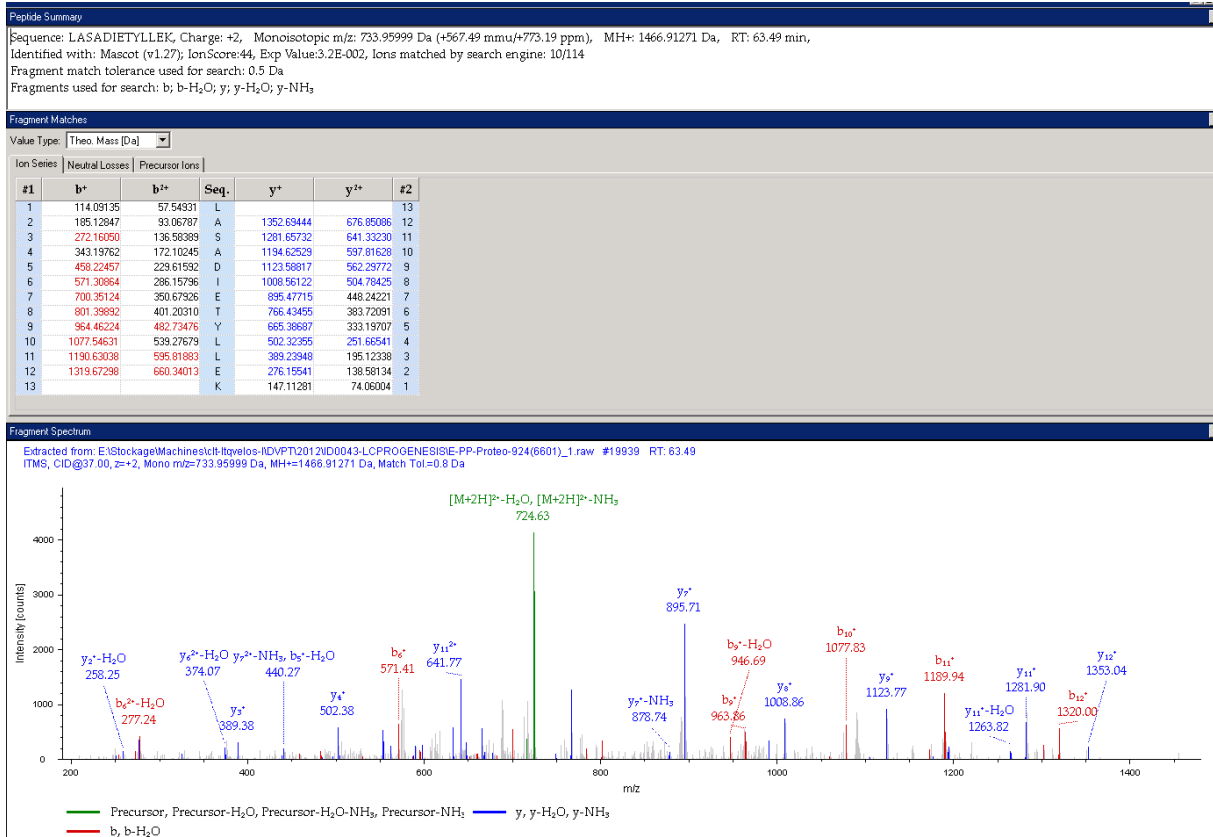

## Protein references (2):

- Alpha-1-acid glycoprotein 1 OS=Homo sapiens GN=ORM1 PE=1 SV=1 - [A1AG1\_HUMAN]

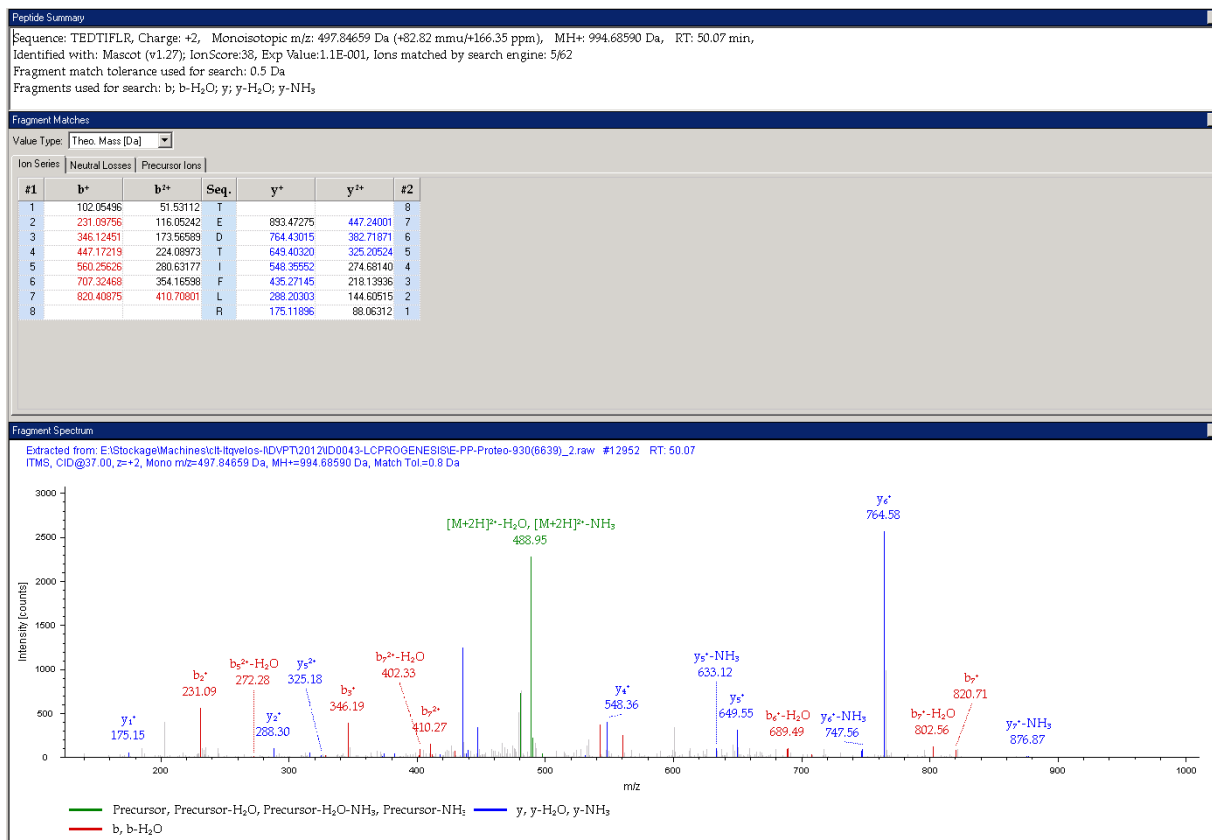

Protein references (2):

- Ig heavy chain V-III region BRO OS=Homo sapiens PE=1 SV=1 - [HV305\_HUMAN]

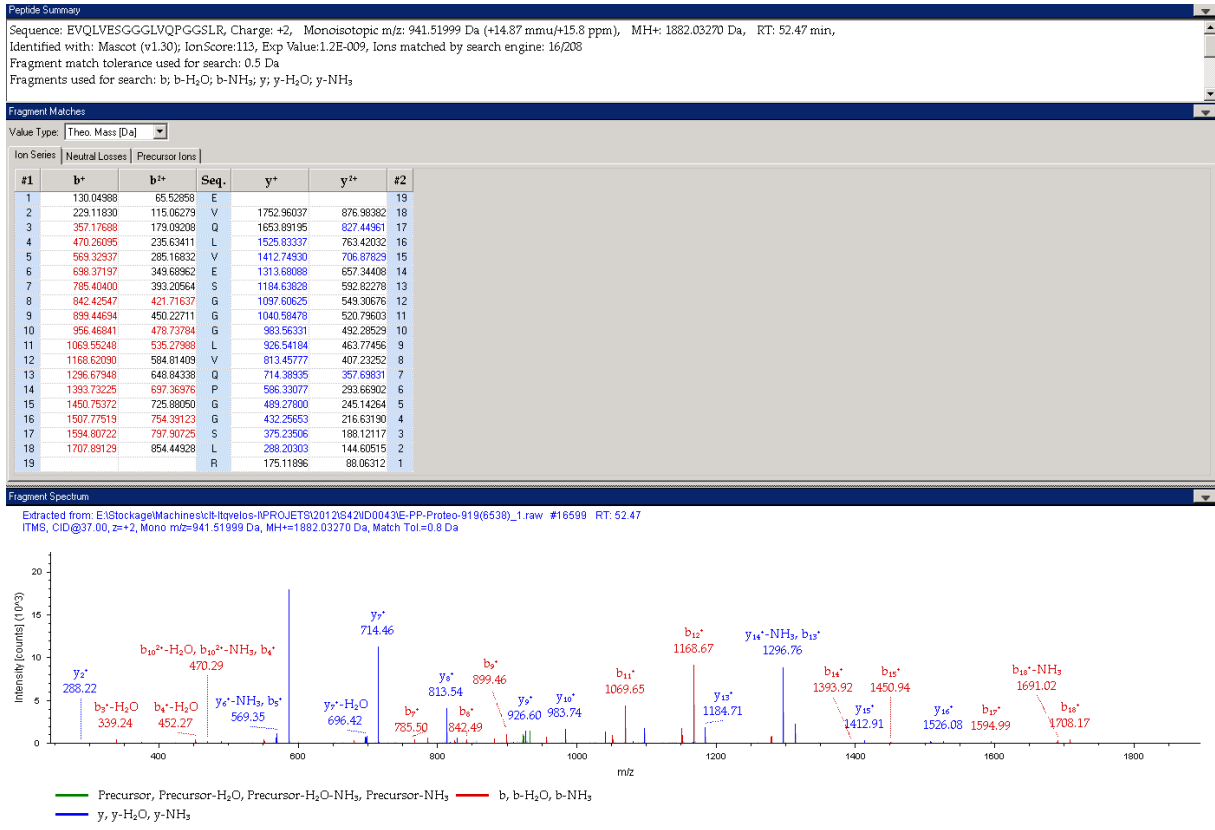

# Protein references (1):

- Desmoplakin OS=Homo sapiens GN=DSP PE=1 SV=3 - [DESP\_HUMAN]

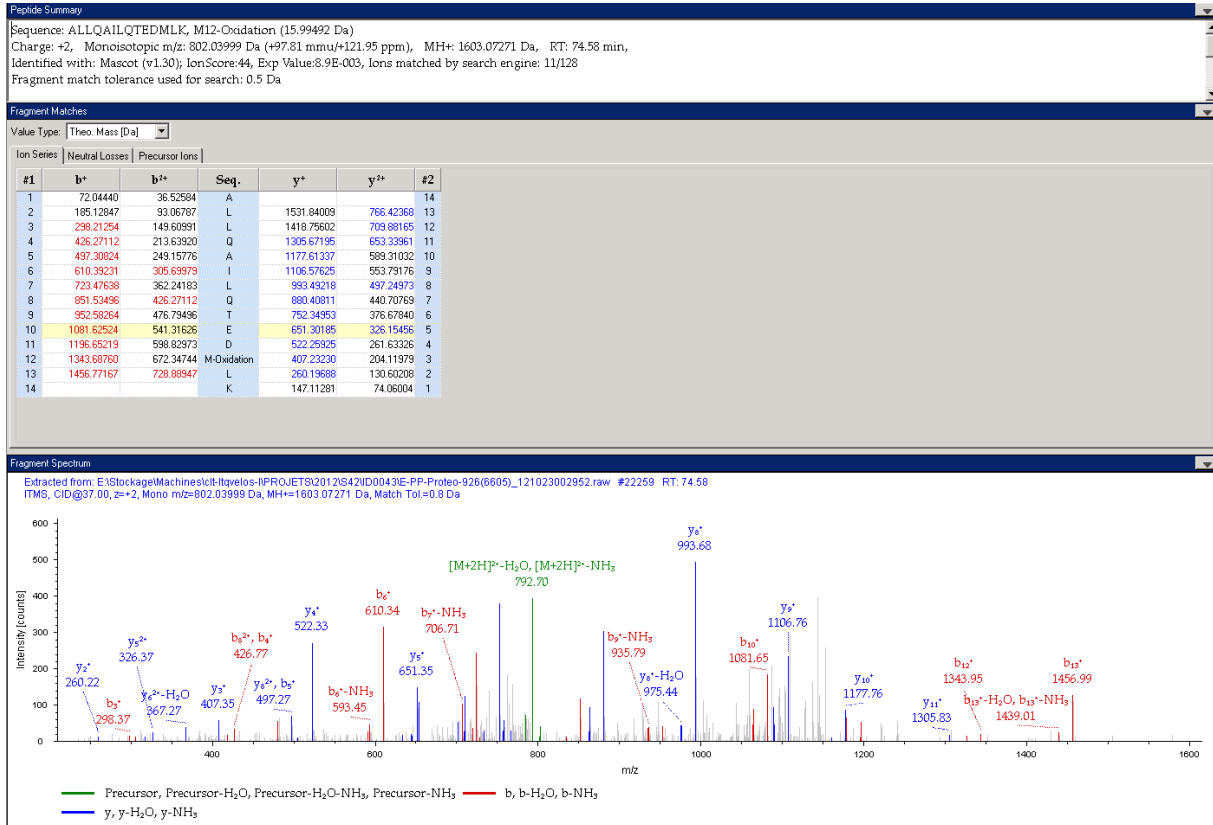

Protein references (1):

- Schlafen family member 14 OS=Homo sapiens GN=SLFN14 PE=2 SV=2 - [SLN14\_HUMAN]

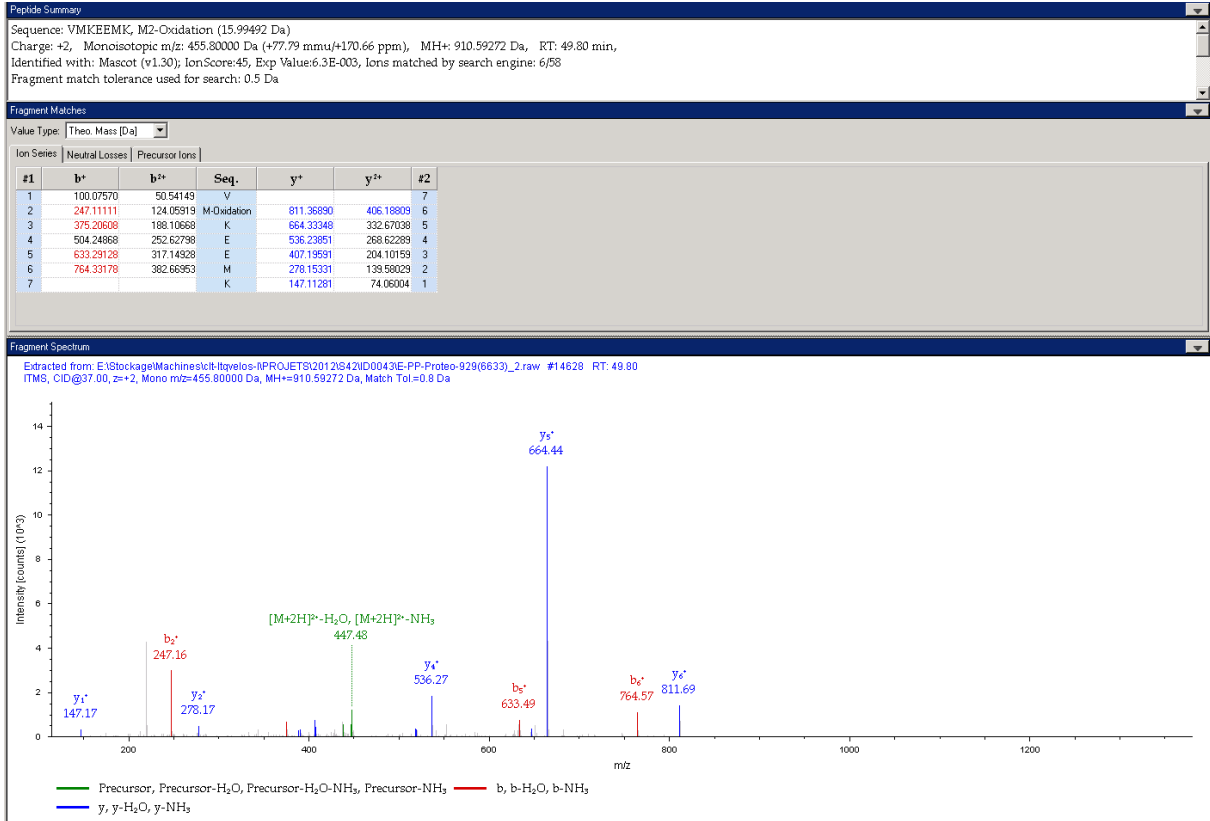

Protein references (1):

- Adenylosuccinate lyase OS=Homo sapiens GN=ADSL PE=1 SV=2 - [PUR8\_HUMAN]

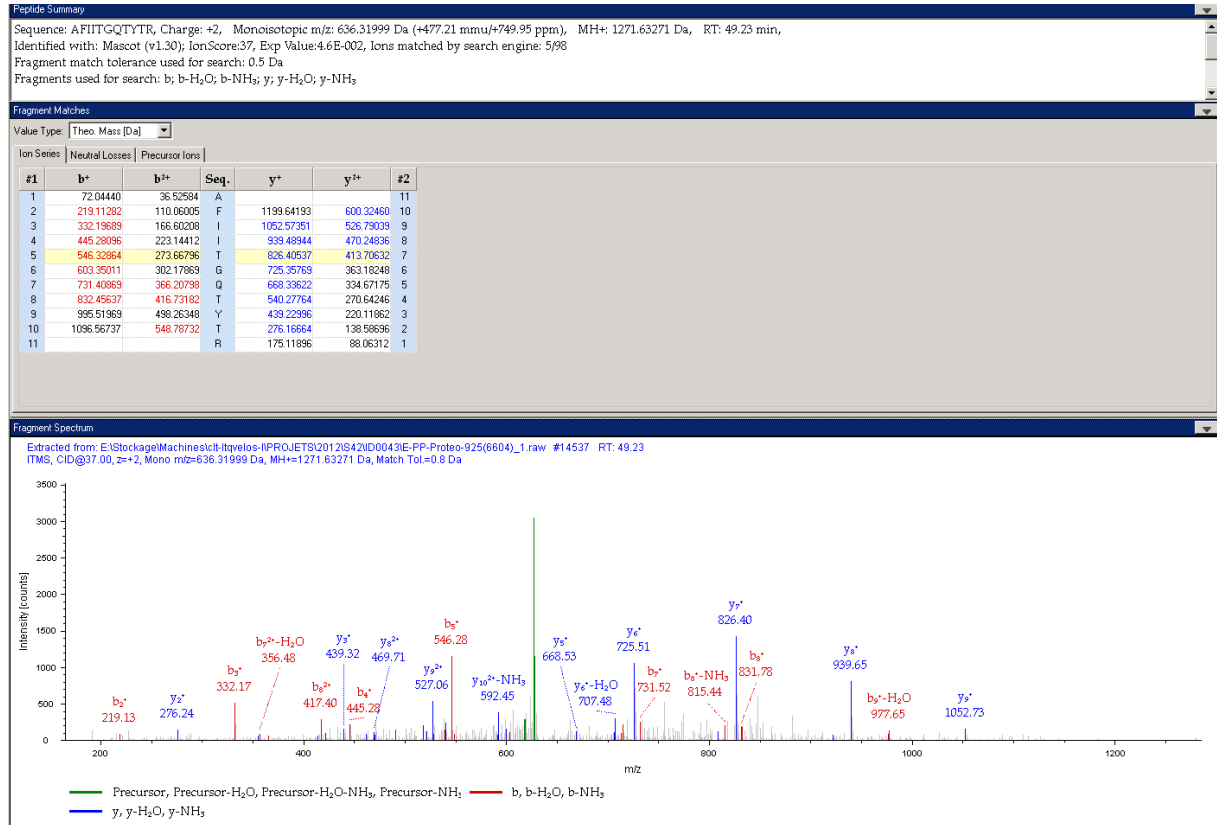

Protein references (1):

- Serpin B5 OS=Homo sapiens GN=SERPINB5 PE=1 SV=2 - [SPB5\_HUMAN]

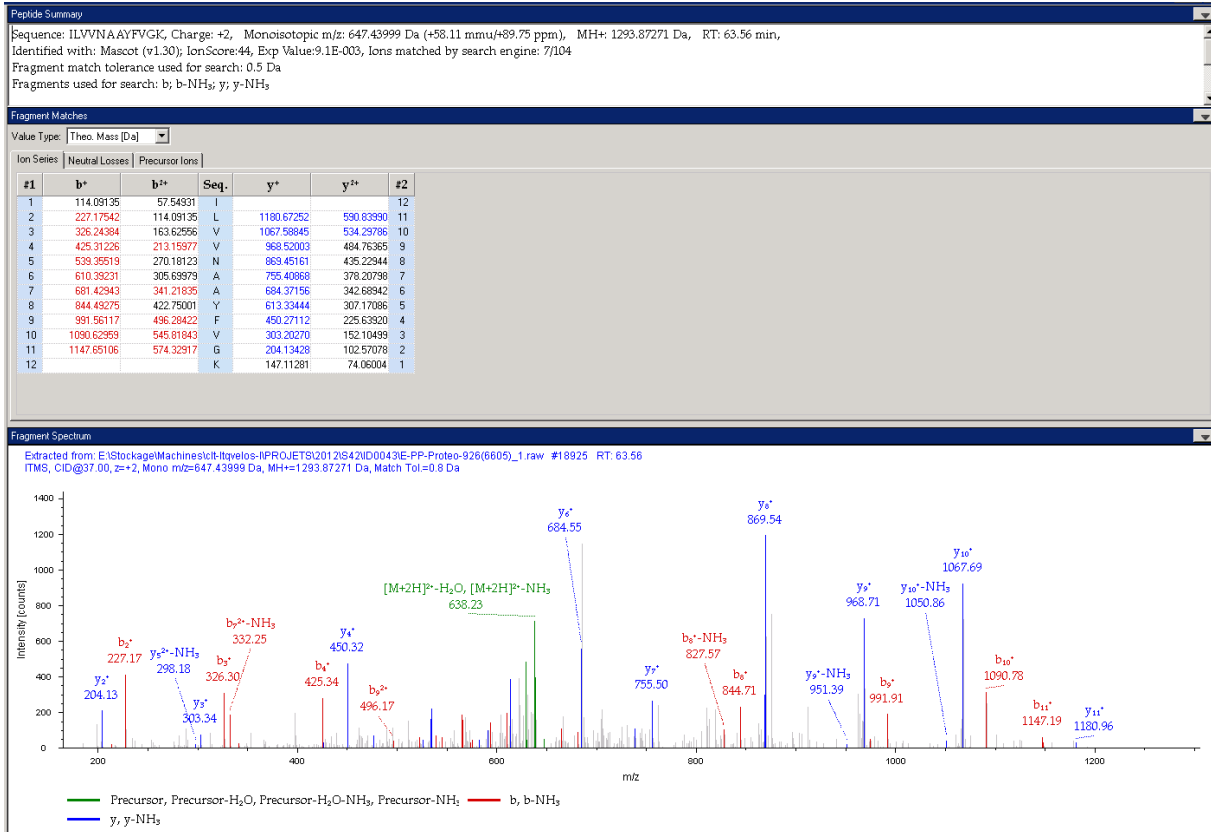

Protein references (1):

- Myomesin-1 OS=Homo sapiens GN=MYOM1 PE=1 SV=2 - [MYOM1\_HUMAN]

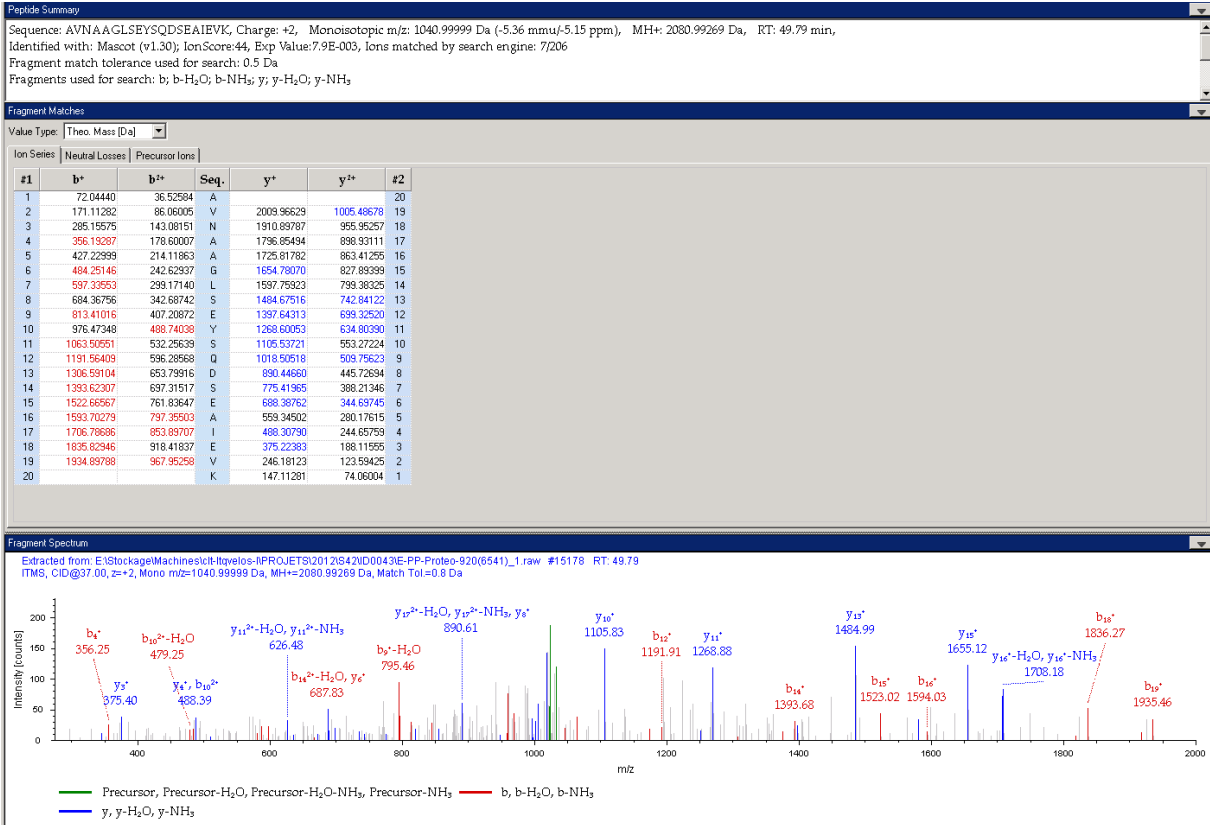



Protein references (1):

- Copper-transporting ATPase 1 OS=Homo sapiens GN=ATP7A PE=1 SV=3 - [ATP7A\_HUMAN]

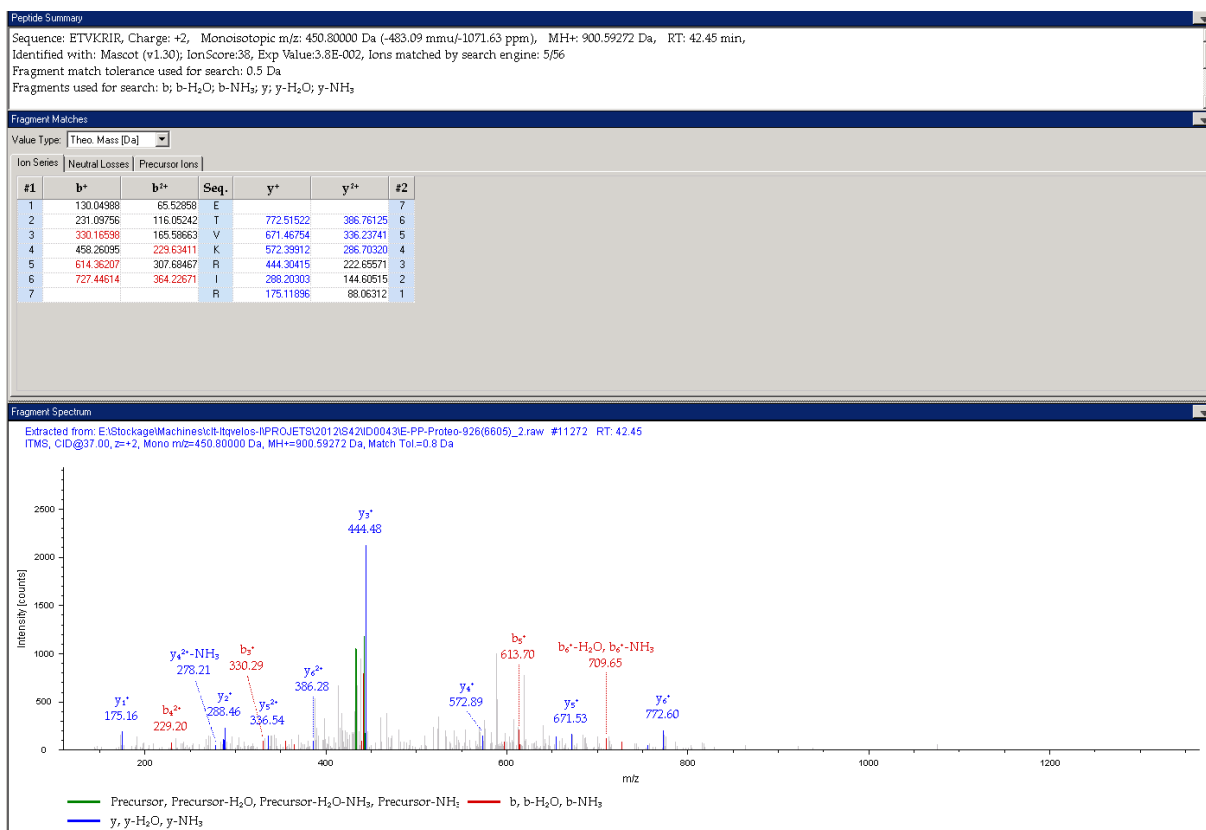

Protein references (1):

- Tyrosine-protein phosphatase non-receptor type 13 OS=Homo sapiens GN=PTPN13 PE=1 SV=2 - [PTN13\_HUMAN]

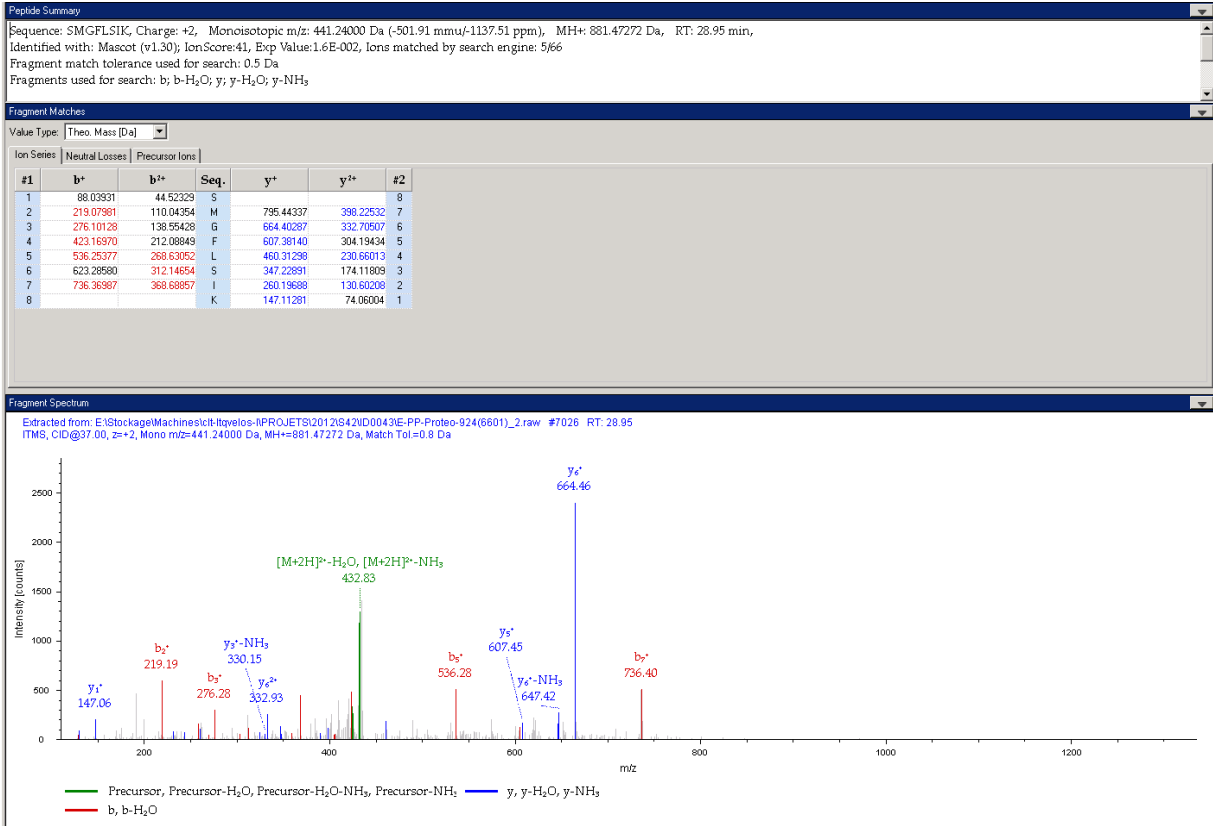

Protein references (1):

- Midasin OS=Homo sapiens GN=MDN1 PE=1 SV=2 - [MDN1\_HUMAN]

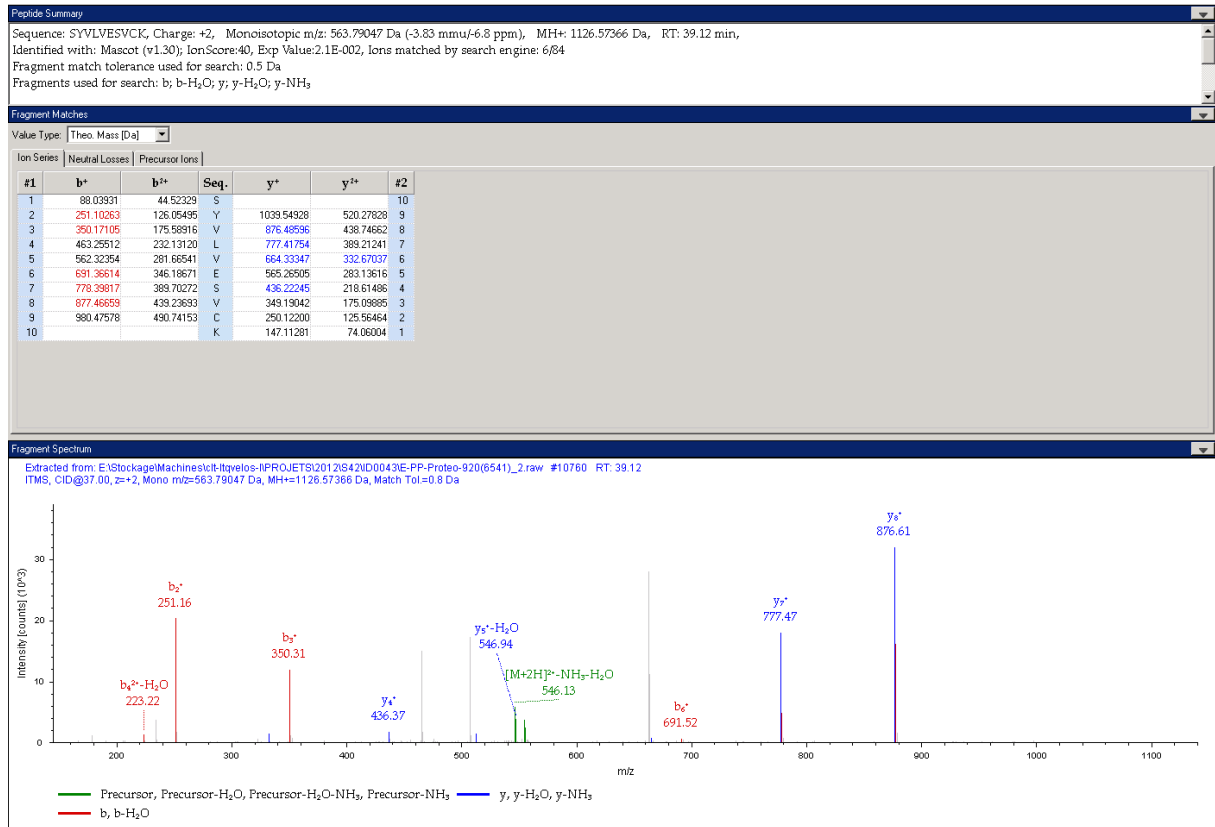

Protein references (1):

- Polymerase I and transcript release factor OS=Homo sapiens GN=PTRF PE=1 SV=1 - [PTRF\_HUMAN]

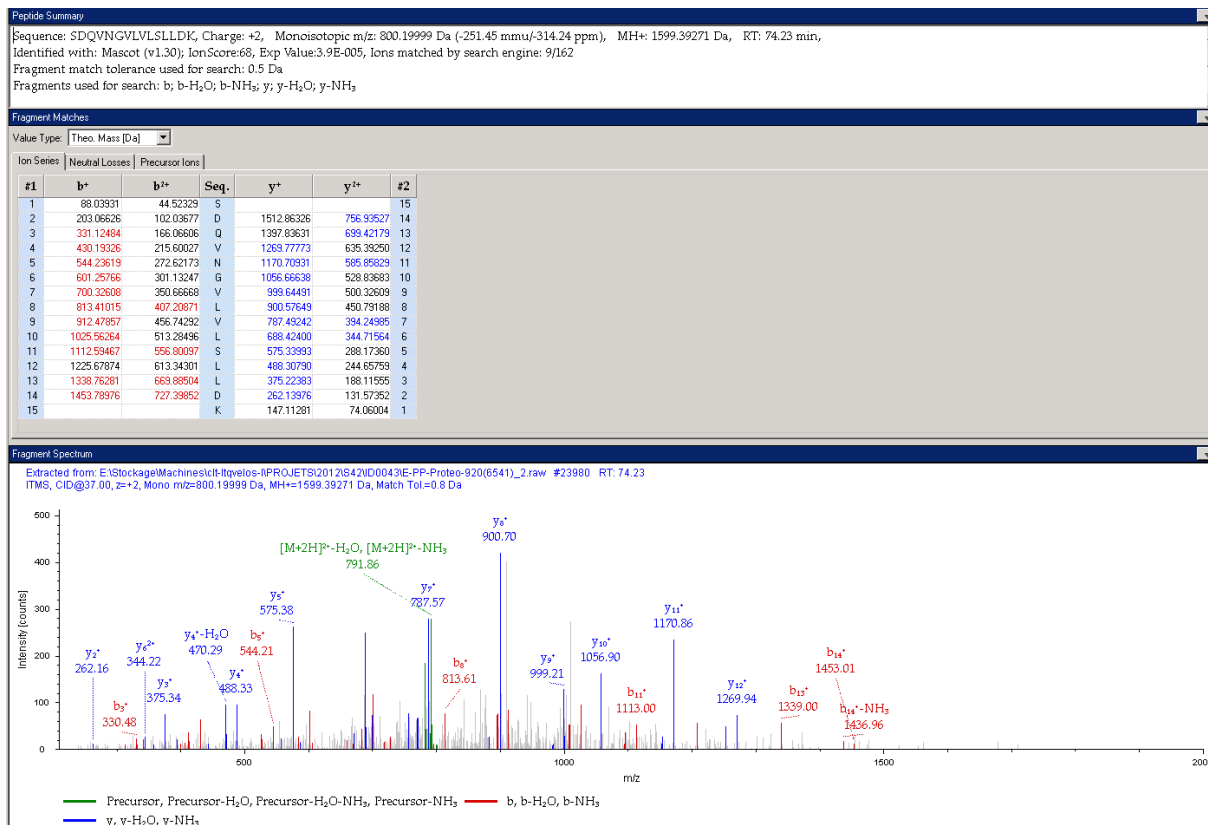

## Protein references (1):

- Annexin A3 OS=Homo sapiens GN=ANXA3 PE=1 SV=3 - [ANXA3\_HUMAN]

Peptide Summary

Sequence: GAGTNE DALI EILITLR, Charge: +2, Monoisotopic m/z: 838.03999 Da (+601.44 mmu/+717.68 ppm), MH+: 1675.07270 Da, RT: 73.21 min, Identified with: Mascot (v1.30); IonScore:43, Exp Value:1.2E-002, Ions matched by search engine: 11/164  
 Fragment match tolerance used for search: 0.5 Da  
 Fragments used for search: b; b-H<sub>2</sub>O; b-NH<sub>3</sub>; y; y-H<sub>2</sub>O; y-NH<sub>3</sub>

Fragment Matches

Value Type: Theo. Mass [Da]

| #1 | b*         | b**       | Seq. | y*         | y**       | #2 |
|----|------------|-----------|------|------------|-----------|----|
| 1  | 58.02975   | 23.51801  | G    |            |           | 16 |
| 2  | 129.06597  | 85.03857  | A    | 1616.84307 | 808.52017 | 15 |
| 3  | 186.08734  | 93.54731  | G    | 1545.81196 | 773.40361 | 14 |
| 4  | 287.13502  | 144.07115 | T    | 1488.75048 | 744.85888 | 13 |
| 5  | 401.17795  | 201.09261 | N    | 1387.74290 | 694.37504 | 12 |
| 6  | 530.22005  | 265.61391 | E    | 1273.63987 | 637.35357 | 11 |
| 7  | 645.24750  | 323.12739 | D    | 1144.65727 | 572.83227 | 10 |
| 8  | 716.28452  | 358.64595 | A    | 1029.63032 | 515.31880 | 9  |
| 9  | 829.36869  | 415.18798 | L    | 958.59320  | 479.80024 | 8  |
| 10 | 942.45276  | 471.73002 | I    | 845.50913  | 423.25820 | 7  |
| 11 | 1071.49536 | 536.25132 | E    | 732.42506  | 366.71617 | 6  |
| 12 | 1184.57943 | 592.79335 | I    | 603.38246  | 302.19487 | 5  |
| 13 | 1297.66350 | 649.33539 | L    | 490.29839  | 245.65283 | 4  |

Fragment Spectrum

Extracted from: E:\Stockage\machines\ict-livolos-IPROJETS\2012\642\UD0043E-PP-Proteo-924(6601)\_2.raw #23314 RT: 73.21  
 ITMS, CID@37.00, z=+2, Mono m/z=838.03999 Da, MH+=1675.07270 Da, Match Tol=0.8 Da

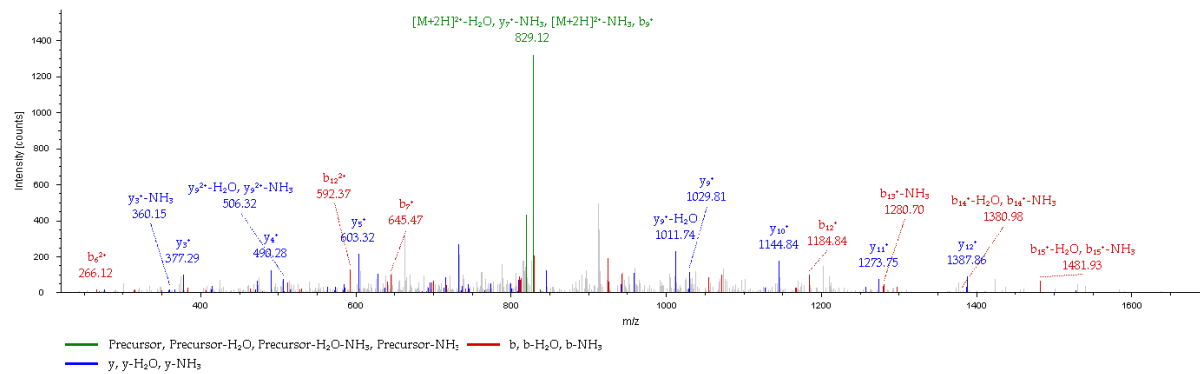

## Protein references (1):

- Annexin A4 OS=Homo sapiens GN=ANXA4 PE=1 SV=4 - [ANXA4\_HUMAN]

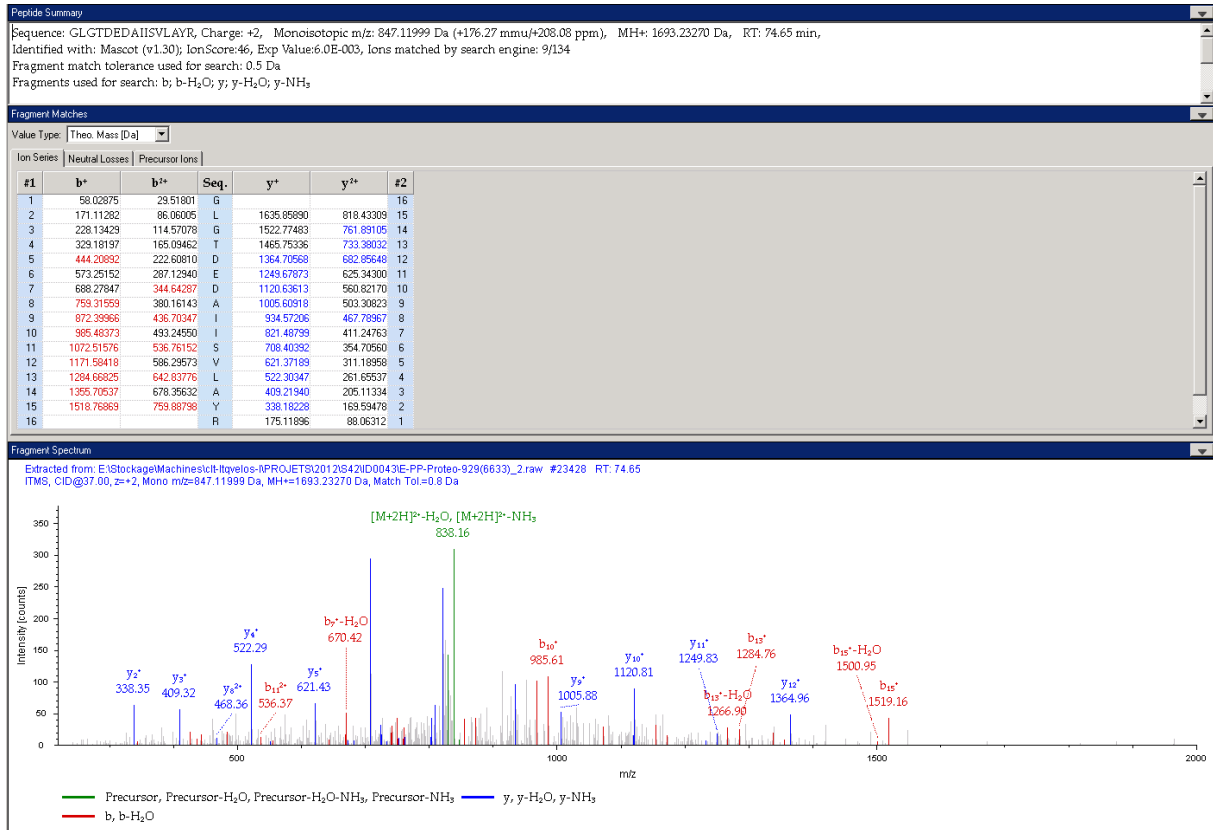

Protein references (1):

- Hydroxysteroid dehydrogenase-like protein 2 OS=Homo sapiens GN=HSD2L2 PE=1 SV=1 - [HSD2L2\_HUMAN]

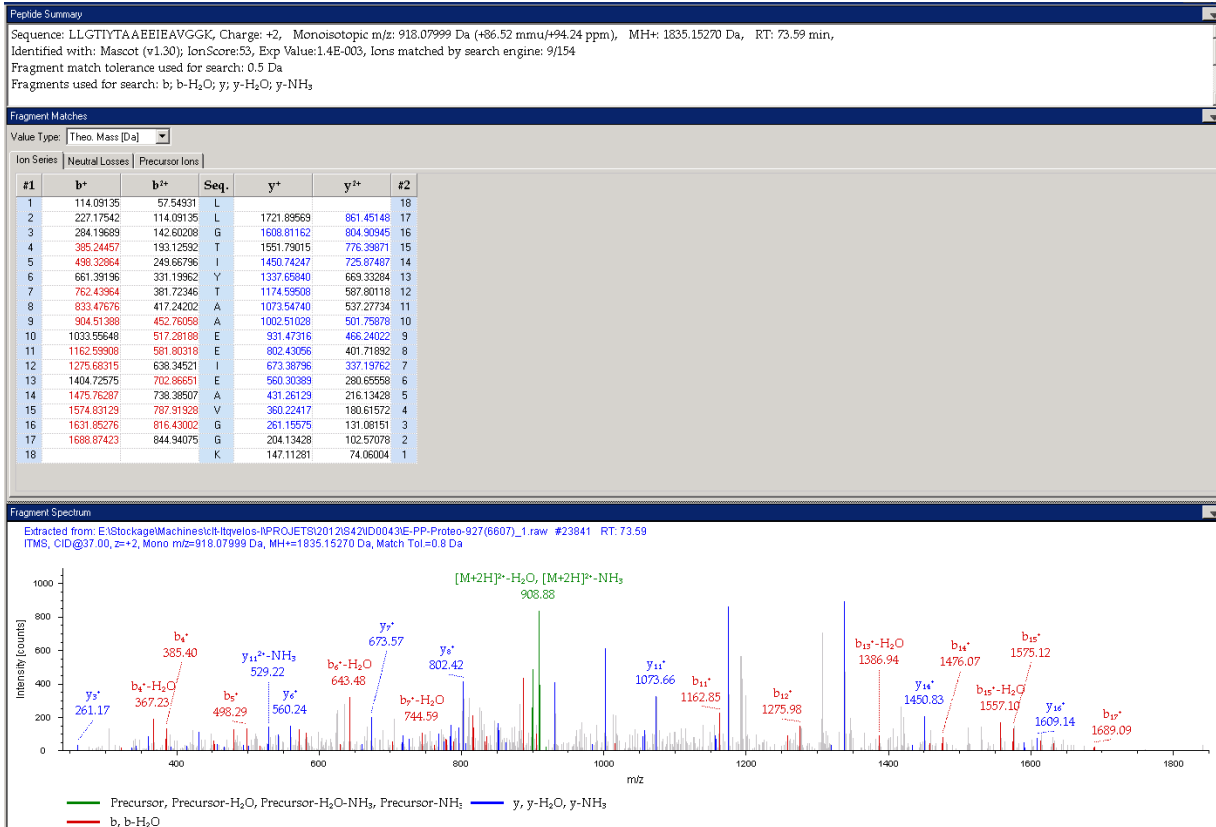

Protein references (1):

- Protein-L-isoaspartate(D-aspartate) O-methyltransferase OS=Homo sapiens GN=PCMT1 PE=1 SV=4 - [PIMT\_HUMAN]

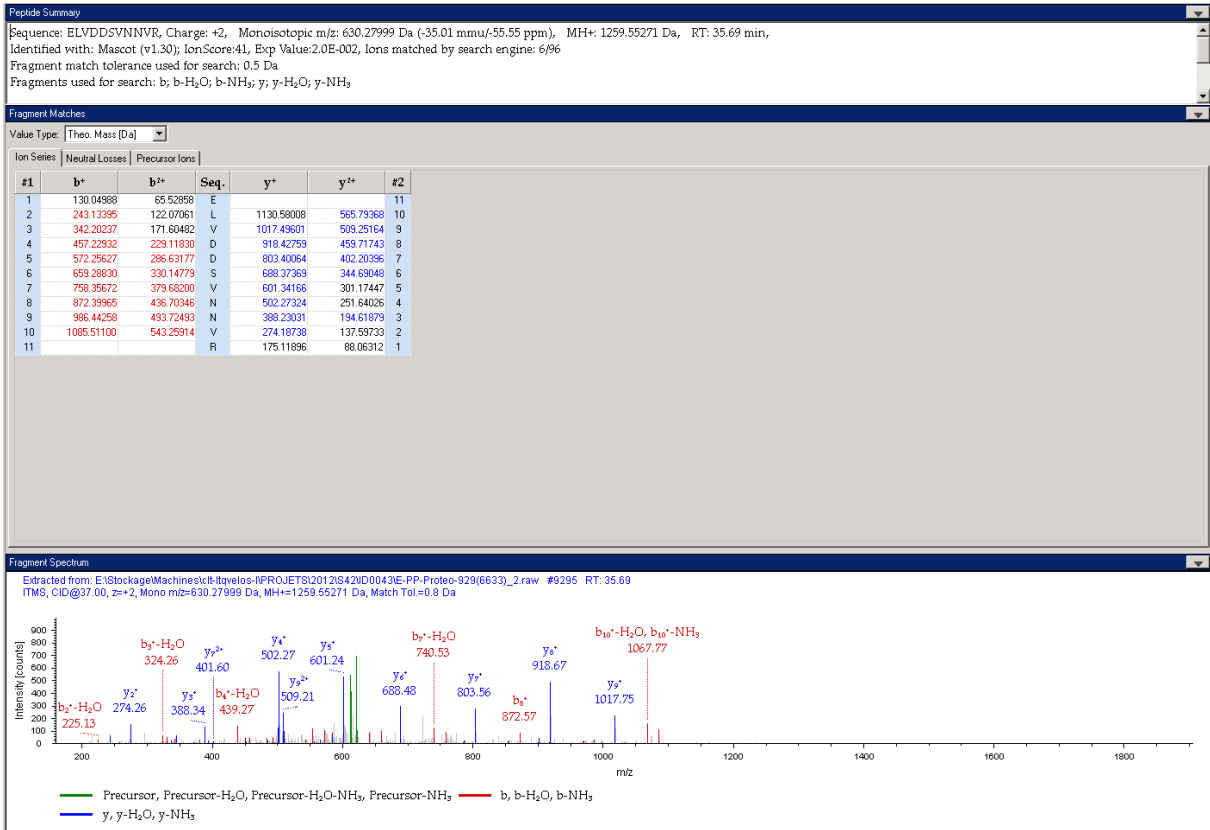



# Protein references (1):

- Cytosolic 5'-nucleotidase 3 OS=Homo sapiens GN=NT5C3 PE=1 SV=3 - [5NT3\_HUMAN]

Peptide Summary

Sequence: VVSNFMDFDETGVLK, M6-Oxidation (15.99492 Da)  
 Charge: +2, Monoisotopic m/z: 858.91999 Da (+8.85 mmu/+10.31 ppm), MH+: 1716.83270 Da, RT: 57.12 min,  
 Identified with: Mascot (v1.30); IonScore:46, Exp Value:5.4E-003, Ions matched by search engine: 11/150  
 Fragment match tolerance used for search: 0.5 Da

Fragment Matches

Value Type: Theo. Mass [Da]

| Ion Series | Neutral Losses | Precursor Ions |             |            |           |    |
|------------|----------------|----------------|-------------|------------|-----------|----|
| #1         | b*             | b**            | Seq.        | y*         | y**       | #2 |
| 1          | 100.07570      | 50.54143       | V           |            |           | 15 |
| 2          | 198.14412      | 100.07570      | V           | 1617.74659 | 809.37633 | 14 |
| 3          | 286.17615      | 143.59171      | S           | 1518.67817 | 759.84272 | 13 |
| 4          | 400.21908      | 200.61318      | N           | 1431.64614 | 716.32671 | 12 |
| 5          | 547.28750      | 274.14739      | F           | 1317.60321 | 659.30524 | 11 |
| 6          | 694.32291      | 347.66509      | M-Oxidation | 1170.53479 | 585.77103 | 10 |
| 7          | 809.34986      | 405.17857      | D           | 1023.49937 | 512.25332 | 9  |
| 8          | 956.41828      | 478.71278      | F           | 908.47242  | 454.73985 | 8  |
| 9          | 1071.44523     | 536.22525      | D           | 761.40400  | 381.20564 | 7  |
| 10         | 1200.48783     | 600.74755      | E           | 646.37705  | 323.83216 | 6  |
| 11         | 1301.53551     | 651.27138      | T           | 517.33445  | 259.17086 | 5  |
| 12         | 1359.55639     | 679.76213      | G           | 416.28677  | 208.64702 | 4  |
| 13         | 1457.62540     | 729.31634      | V           | 359.26530  | 180.13629 | 3  |
| 14         | 1570.70947     | 785.85837      | L           | 260.19688  | 130.60208 | 2  |
| 15         |                |                | K           | 147.11281  | 74.06004  | 1  |

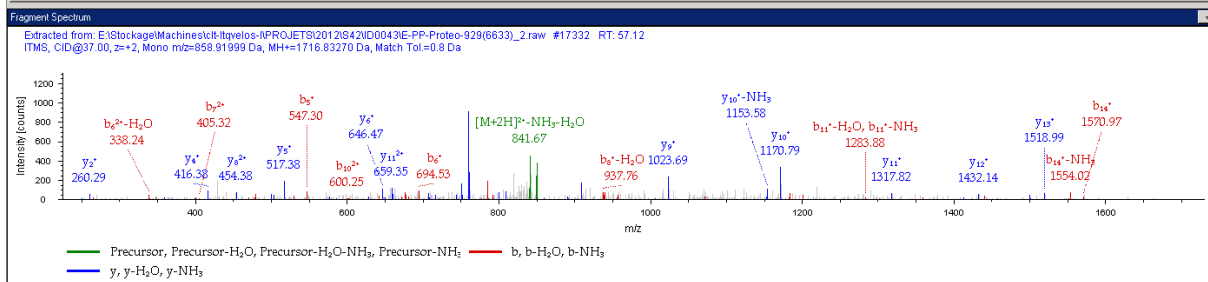

Protein references (1):

- Uncharacterized protein C5orf42 OS=Homo sapiens GN=C5orf42 PE=1 SV=4 - [CE042\_HUMAN]

Peptide Summary

Sequence: CFPFKLDLVLKSSSR, Charge: +3, Monoisotopic m/z: 564.2400 Da (+256.88 mmu/455.26 ppm), MH+: 1690.70544 Da, RT: 16.33 min, Identified with: Mascot (v1.30); IonScore:38, Exp Value:3.5E-002, Ions matched by search engine: 9/146  
 Fragment match tolerance used for search: 0.5 Da  
 Fragments used for search: b; b-H<sub>2</sub>O; b-NH<sub>3</sub>; y; y-H<sub>2</sub>O; y-NH<sub>3</sub>

Fragment Matches

Value Type: Theo. Mass [Da]

| #1 | Neutral Losses |                 |                 | Seq. | Precursor Ions |                 |                 | #2 |
|----|----------------|-----------------|-----------------|------|----------------|-----------------|-----------------|----|
|    | b <sup>+</sup> | b <sup>2+</sup> | b <sup>3+</sup> |      | y <sup>+</sup> | y <sup>2+</sup> | y <sup>3+</sup> |    |
| 1  | 104.01647      | 52.51187        | 35.34367        | C    |                |                 |                 | 15 |
| 2  | 201.06324      | 101.03826       | 67.69460        | P    | 1586.92653     | 793.96690       | 529.64703       | 14 |
| 3  | 248.13766      | 174.57247       | 116.71740       | F    | 1489.87376     | 745.44052       | 497.29610       | 13 |
| 4  | 445.19043      | 223.09885       | 149.06833       | P    | 1342.80534     | 671.90631       | 448.27330       | 12 |
| 5  | 573.28540      | 287.14634       | 191.76665       | K    | 1245.75257     | 623.37992       | 415.92237       | 11 |
| 6  | 686.36947      | 343.68837       | 229.46134       | L    | 1117.65760     | 559.33244       | 373.22405       | 10 |
| 7  | 801.39642      | 401.20185       | 267.80366       | D    | 1004.57353     | 502.79040       | 335.52936       | 9  |
| 8  | 914.48049      | 457.74388       | 305.49835       | L    | 883.54658      | 445.27693       | 297.18704       | 8  |
| 9  | 1013.54891     | 507.27809       | 338.52115       | V    | 776.46251      | 388.73489       | 253.49235       | 7  |
| 10 | 1126.63298     | 563.82013       | 376.21584       | L    | 677.39409      | 339.20068       | 226.46955       | 6  |
| 11 | 1213.88591     | 607.33614       | 405.22652       | S    | 564.31002      | 282.65985       | 188.77486       | 5  |
| 12 | 1341.75996     | 671.38363       | 447.92484       | K    | 477.27798      | 239.14263       | 159.76418       | 4  |
| 13 | 1428.79201     | 714.89964       | 476.93952       | S    | 349.18302      | 175.09515       | 117.06586       | 3  |
| 14 | 1515.82404     | 758.41566       | 505.94620       | S    | 262.15099      | 131.57913       | 88.06518        | 2  |
| 15 |                |                 |                 | R    | 175.11896      | 88.06312        | 59.04450        | 1  |

Fragment Spectrum

Extracted from: E:\Stockage\Machines\cit-Itavelos-IPROJETS\2012\642\ID0043E-PP-Proteo-926(6605)\_2.raw #3091 RT: 16.33 ITMS, CID@37.00, z=+3, Mono m/z=564.24000 Da, MH+=1690.70544 Da, Match Tol=0.8 Da

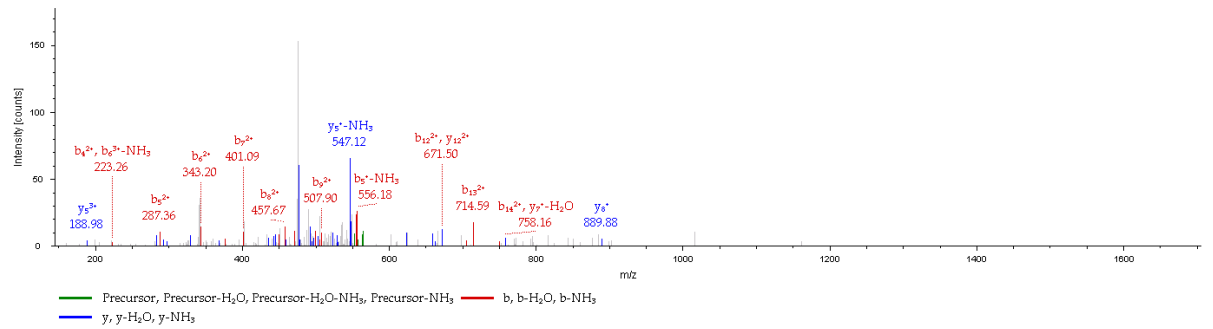

Protein references (1):

- Glyoxalase domain-containing protein 4 OS=Homo sapiens GN=GLOD4 PE=1 SV=1 - [GLOD4\_HUMAN]

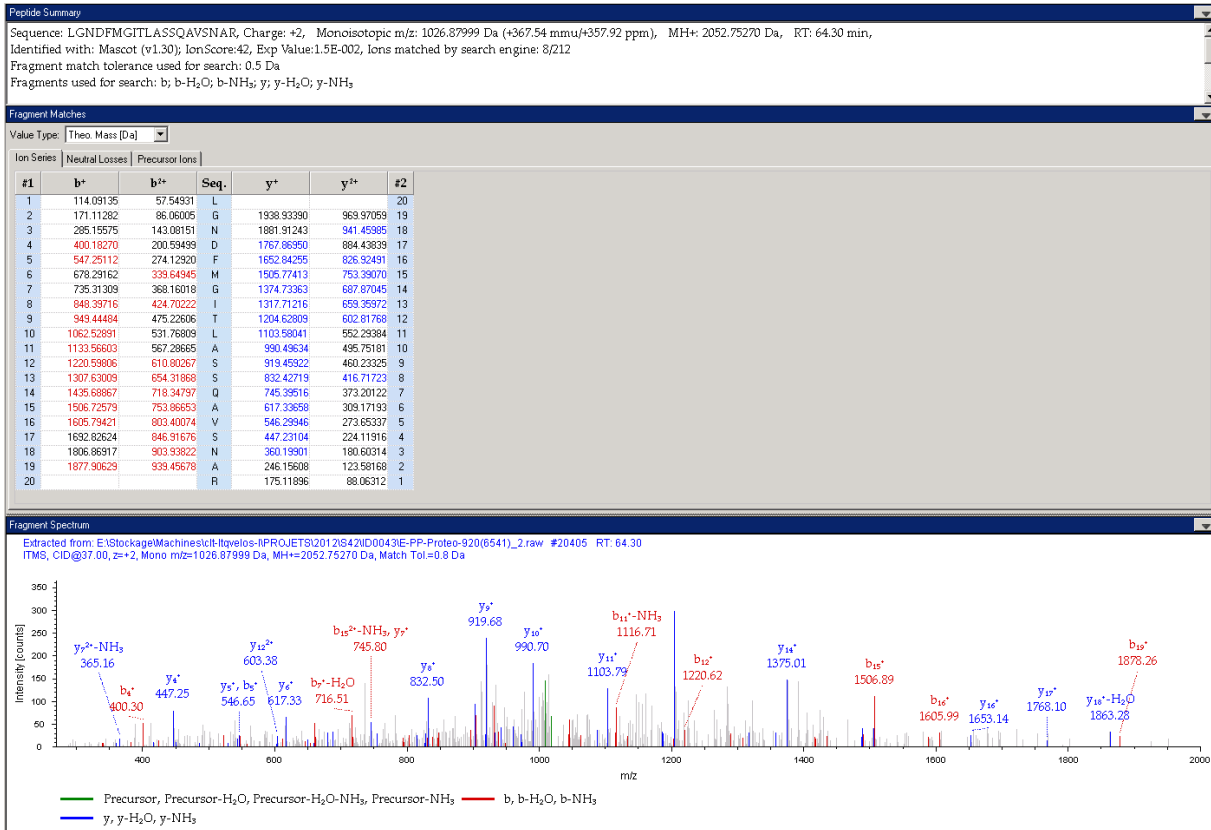

Protein references (1):

- GTP:AMP phosphotransferase AK3, mitochondrial OS=Homo sapiens GN=AK3 PE=1 SV=4 - [KAD3\_HUMAN]

Peptide Summary

Sequence: NLTQYSWLLDGFPR, Charge: +2, Monoisotopic m/z: 855.27999 Da (-156.06 mmu/-182.47 ppm), MH+: 1709.55270 Da, RT: 78.28 min, Identified with: Mascot (v1.30), IonScore:48, Exp Value:3.7E-003, Ions matched by search engine: 9/144  
 Fragment match tolerance used for search: 0.5 Da  
 Fragments used for search: b; b-H<sub>2</sub>O; b-NH<sub>3</sub>; y; y-H<sub>2</sub>O; y-NH<sub>3</sub>

Fragment Matches

Value Type: Theo. Mass [Da]

| Ion Series | Neutral Losses | Precursor Ions |      |            |           |    |
|------------|----------------|----------------|------|------------|-----------|----|
| #1         | b*             | b**            | Seq. | y*         | y**       | #2 |
| 1          | 115.05021      | 58.02874       | N    |            |           | 14 |
| 2          | 228.13428      | 114.57078      | L    | 1595.82171 | 798.41449 | 13 |
| 3          | 329.18196      | 165.09462      | T    | 1482.73764 | 741.37246 | 12 |
| 4          | 457.24054      | 229.12391      | Q    | 1381.68996 | 691.34862 | 11 |
| 5          | 620.30386      | 310.65557      | V    | 1253.63138 | 627.31533 | 10 |
| 6          | 707.33593      | 354.17150      | S    | 1090.56006 | 545.78767 | 9  |
| 7          | 893.41621      | 447.21124      | W    | 1003.53603 | 502.27165 | 8  |
| 8          | 1006.45828     | 503.75326      | L    | 817.45671  | 409.23199 | 7  |
| 9          | 1119.58335     | 560.29531      | L    | 704.37364  | 352.68996 | 6  |
| 10         | 1234.61030     | 617.80879      | D    | 591.28857  | 296.14792 | 5  |
| 11         | 1291.63177     | 646.31952      | G    | 476.26162  | 238.63445 | 4  |
| 12         | 1438.70019     | 719.85373      | F    | 419.24015  | 210.12371 | 3  |
| 13         | 1535.75296     | 768.38012      | P    | 272.17173  | 136.58960 | 2  |
| 14         |                |                | R    | 175.11896  | 88.06312  | 1  |

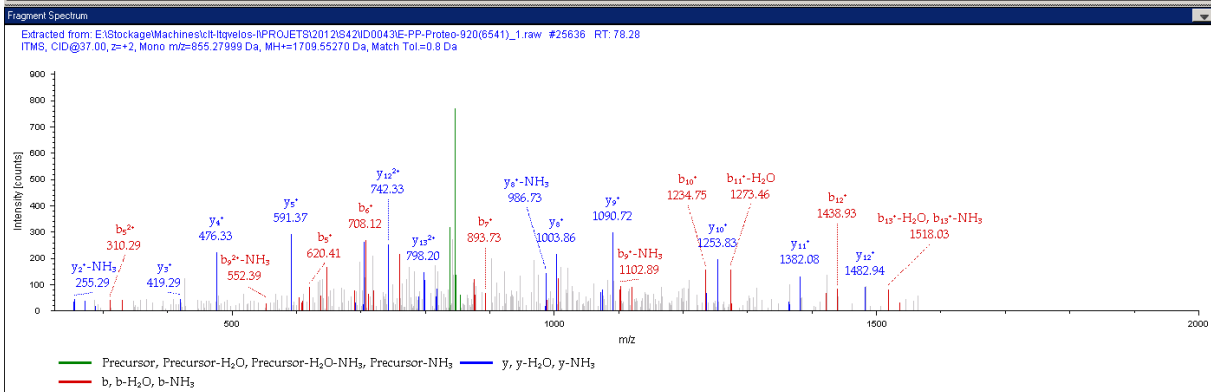

## Protein references (1):

- ADP/ATP translocase 1 OS=Homo sapiens GN=SLC25A4 PE=1 SV=4 - [ADT1\_HUMAN]

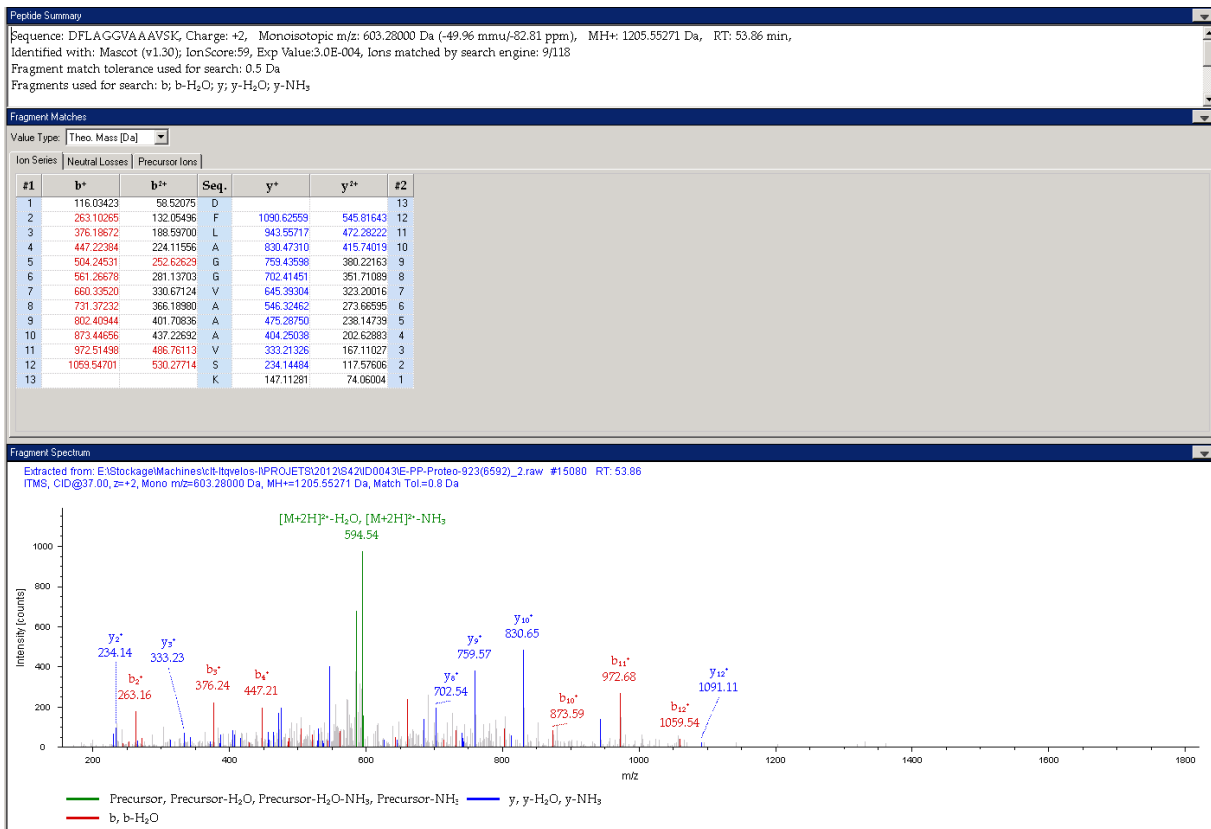

Protein references (1):

- 6-phosphofructokinase, liver type OS=Homo sapiens GN=PFKL PE=1 SV=6 - [K6PL\_HUMAN]

Peptide Summary

Sequence: IMEVIDAITTTAQSHQR, Charge: +2, Monoisotopic m/z: 957.47999 Da (-11.17 mmu/-11.66 ppm), MH+ 1913.95270 Da, RT: 58.32 min, Identified with: Mascot (v1.30); IonScore:104, Exp Value:8.6E-009, Ions matched by search engine: 11/158, Fragment match tolerance used for search: 0.5 Da, Fragments used for search: b; b-H<sub>2</sub>O; b-NH<sub>3</sub>; y; y-H<sub>2</sub>O; y-NH<sub>3</sub>

Fragment Matches

Value Type: Theo. Mass [Da]

| Ion Series | Neutral Losses | Precursor Ions                             |
|------------|----------------|--------------------------------------------|
| #1         | b*             | b* <sup>+</sup> Seq. y* y* <sup>+</sup> #2 |
| 1          | 114.09135      | 57.54931 I 1800.89095 900.94911 17         |
| 2          | 245.13185      | 123.06396 M 1663.85045 835.42886 15        |
| 3          | 374.17445      | 187.59086 E 1540.80785 770.90756 14        |
| 4          | 473.24287      | 237.12507 V 1441.73943 721.37335 13        |
| 5          | 586.32694      | 293.66711 I 1328.65536 664.83132 12        |
| 6          | 701.35389      | 351.18058 D 1213.62841 607.31784 11        |
| 7          | 772.39101      | 386.69914 A 1142.59129 571.79928 10        |
| 8          | 885.47508      | 443.24118 I 1029.50722 515.25725 9         |
| 9          | 986.52276      | 493.76502 T 928.45954 464.73341 8          |
| 10         | 1087.57044     | 544.28986 T 827.41186 414.20957 7          |
| 11         | 1188.61812     | 594.81270 T 726.36418 363.68673 6          |
| 12         | 1259.65524     | 630.33126 A 695.32706 328.16717 5          |
| 13         | 1387.71382     | 694.36095 Q 527.26848 264.13788 4          |
| 14         | 1474.74585     | 737.87656 S 440.23645 220.62186 3          |
| 15         | 1611.80476     | 806.40602 H 303.17754 152.08241 2          |
| 16         | 1739.86334     | 870.43531 Q 175.11896 88.06312 1           |
| 17         |                |                                            |

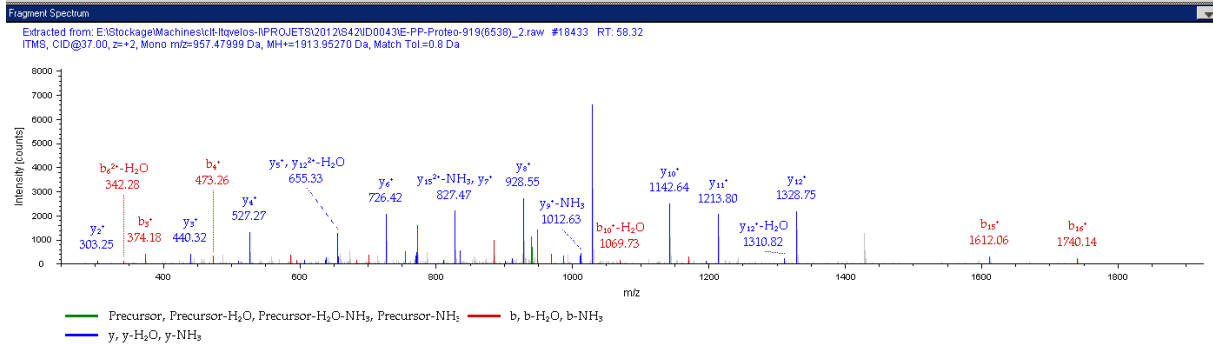

Protein references (1):

- Myosin light chain 1/3, skeletal muscle isoform OS=Homo sapiens GN=MYL1 PE=1 SV=3 - [MYL1\_HUMAN]

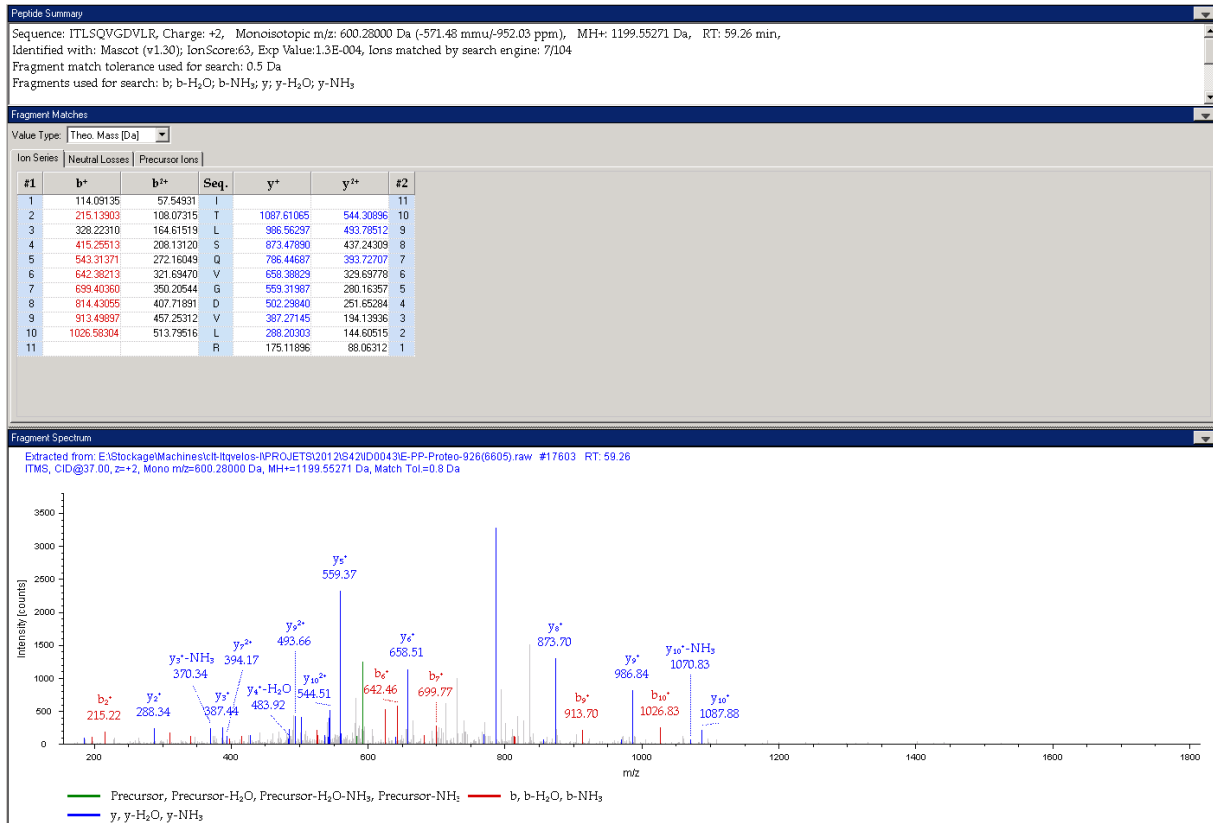

Protein references (1):

- Transgelin OS=Homo sapiens GN=TAGLN PE=1 SV=4 - [TAGL\_HUMAN]

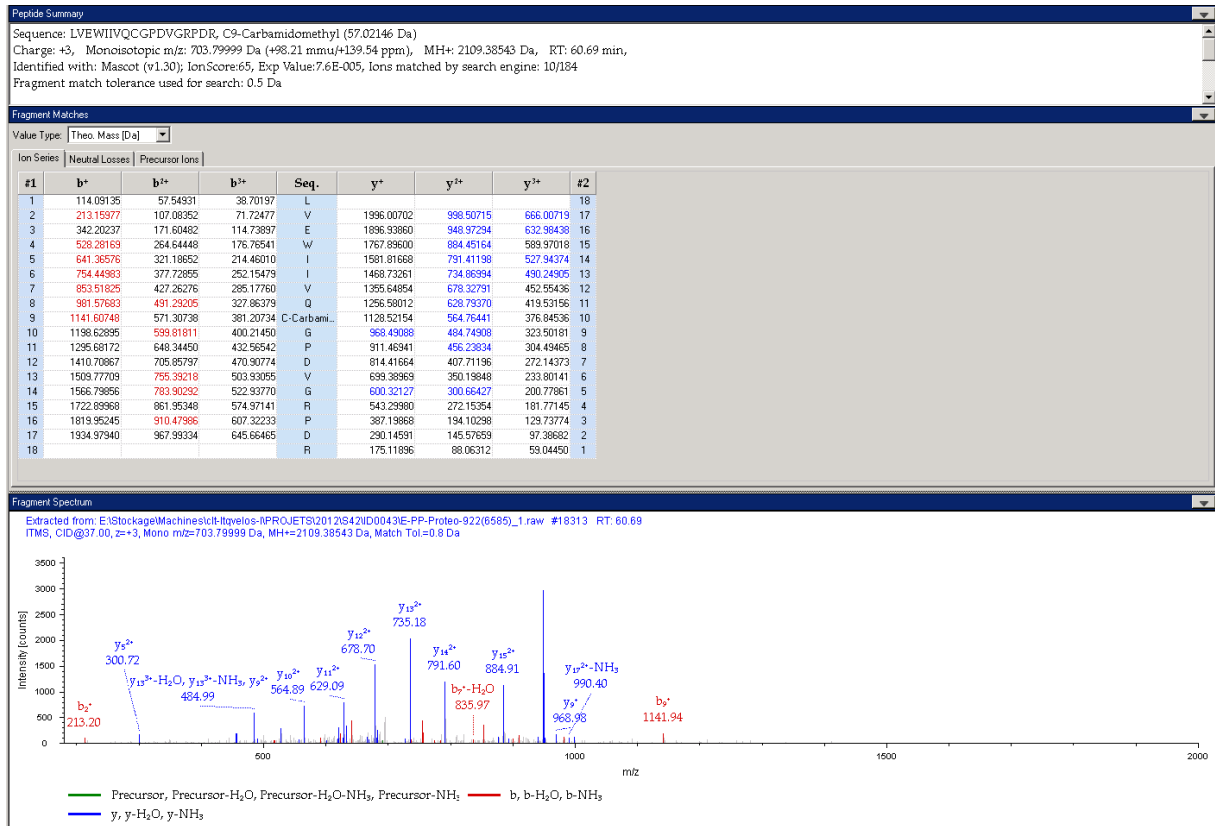



## Protein references (1):

- Flavin reductase (NADPH) OS=Homo sapiens GN=BLVRB PE=1 SV=3 - [BLVRB\_HUMAN]

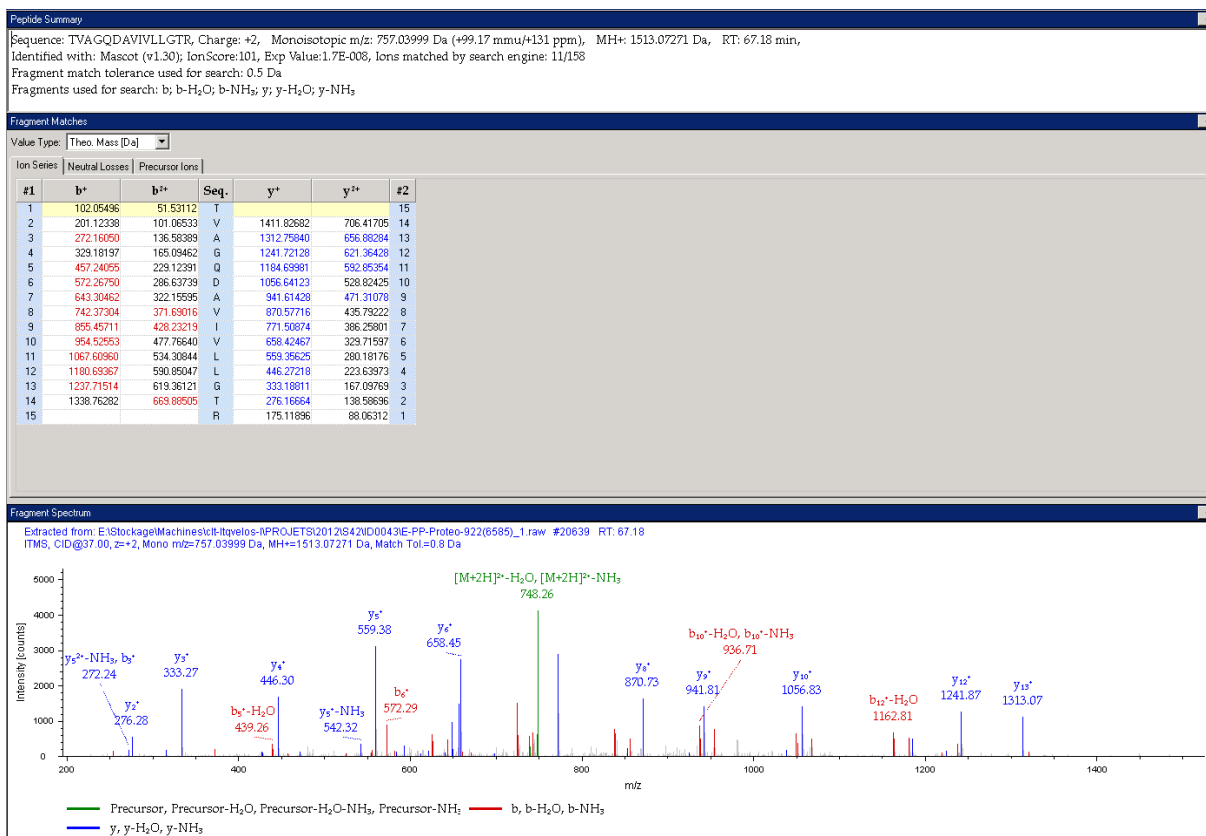

Protein references (1):

- Acylamino-acid-releasing enzyme OS=Homo sapiens GN=APEH PE=1 SV=4 - [ACPH\_HUMAN]

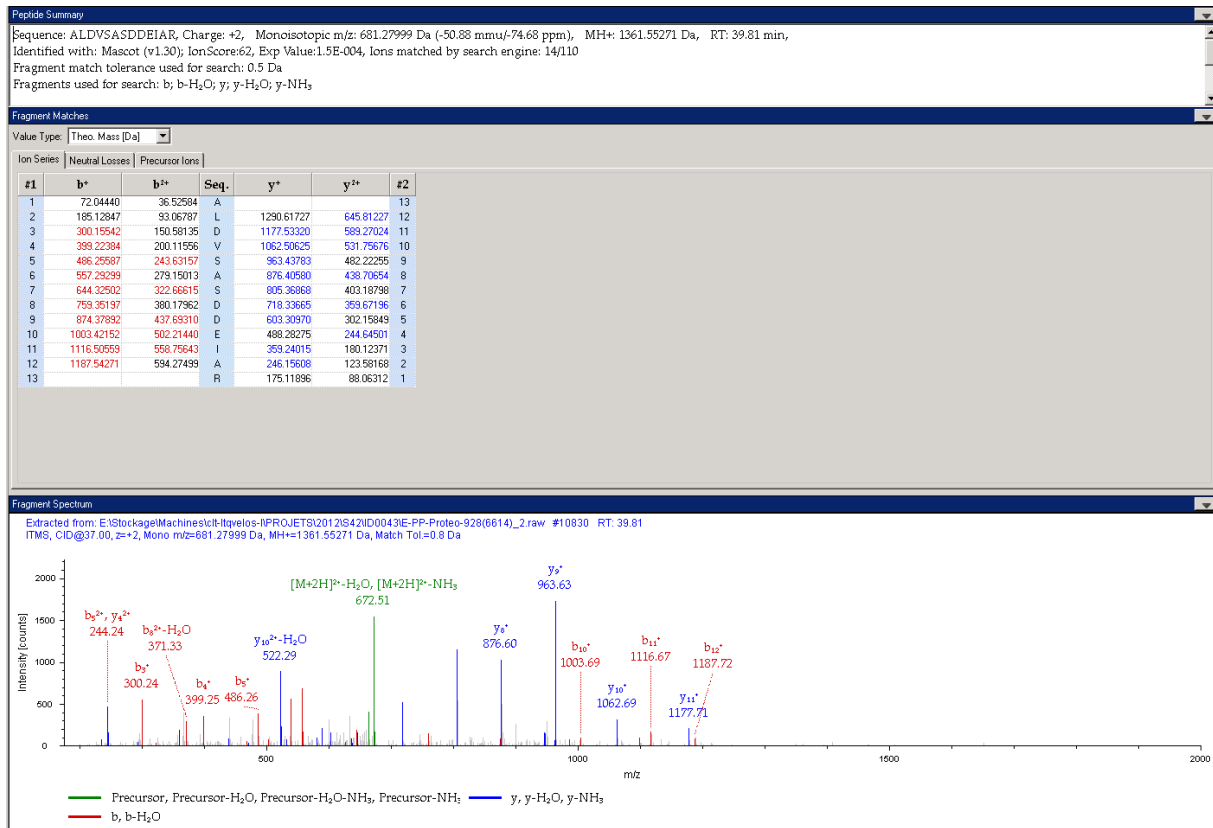

Protein references (1):

- Hemoglobin subunit gamma-1 OS=Homo sapiens GN=HBG1 PE=1 SV=2 - [HBG1\_HUMAN]

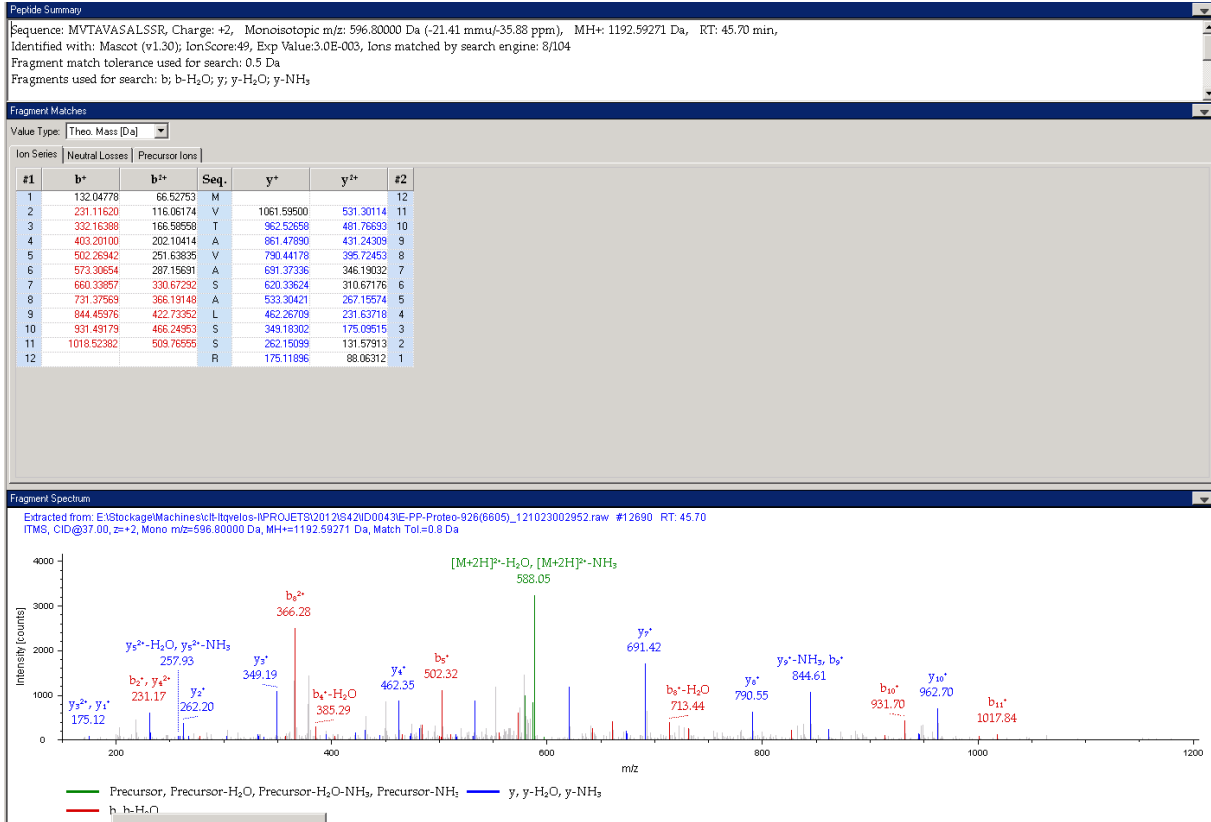

## Protein references (1):

- Alpha-1B-glycoprotein OS=Homo sapiens GN=A1BG PE=1 SV=4 - [A1BG\_HUMAN]

**Peptide Summary**

Sequence: SGLSTGWTQLSK, Charge: +2, Monoisotopic m/z: 633.31999 Da (+490.13 mmu/+773.9 ppm), MH+: 1265.63271 Da, RT: 50.57 min, Identified with: Mascot (v1.27); IonScore:68, Exp Value:1.2E-004, Ions matched by search engine: 9/114  
 Fragment match tolerance used for search: 0.5 Da  
 Fragments used for search: b; b-H<sub>2</sub>O; b-NH<sub>3</sub>; y; y-H<sub>2</sub>O; y-NH<sub>3</sub>

**Fragment Matches**

Value Type: Theo. Mass [Da]

| #1 | Neutral Losses |                 | Precursor Ions |                 | Seq <sub>1</sub> | y <sup>+</sup> | y <sup>++</sup> | #2 |
|----|----------------|-----------------|----------------|-----------------|------------------|----------------|-----------------|----|
|    | b <sup>+</sup> | b <sup>++</sup> | b <sup>+</sup> | b <sup>++</sup> |                  |                |                 |    |
| 1  | 88.03331       | 44.52329        | S              |                 |                  |                |                 | 12 |
| 2  | 145.06078      | 73.03403        | G              |                 |                  | 1177.62121     | 583.31424       | 11 |
| 3  | 258.14485      | 129.57606       | L              |                 |                  | 1120.59974     | 560.80351       | 10 |
| 4  | 345.17688      | 173.09208       | S              |                 |                  | 1007.51567     | 504.26147       | 9  |
| 5  | 446.22456      | 223.61592       | T              |                 |                  | 920.48364      | 460.74546       | 8  |
| 6  | 503.24603      | 252.12665       | G              |                 |                  | 819.43596      | 410.22162       | 7  |
| 7  | 689.32535      | 345.16631       | W              |                 |                  | 762.41449      | 381.71088       | 6  |
| 8  | 790.37303      | 395.69015       | T              |                 |                  | 576.33517      | 288.67122       | 5  |
| 9  | 918.43161      | 459.71944       | Q              |                 |                  | 475.28749      | 238.14738       | 4  |
| 10 | 1031.51568     | 516.26148       | L              |                 |                  | 347.22891      | 174.11809       | 3  |
| 11 | 1118.54771     | 559.77749       | S              |                 |                  | 234.14484      | 117.57606       | 2  |
| 12 |                |                 | K              |                 |                  | 147.11281      | 74.06004        | 1  |

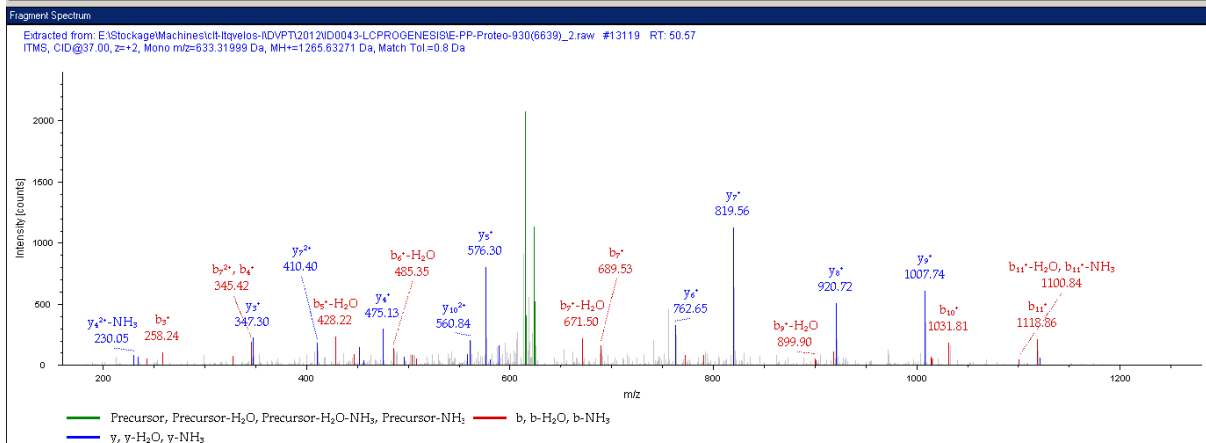

Protein references (6):

- Ubiquitin carboxyl-terminal hydrolase 14 OS=Homo sapiens GN=USP14 PE=1 SV=3 - [UBP14\_HUMAN]

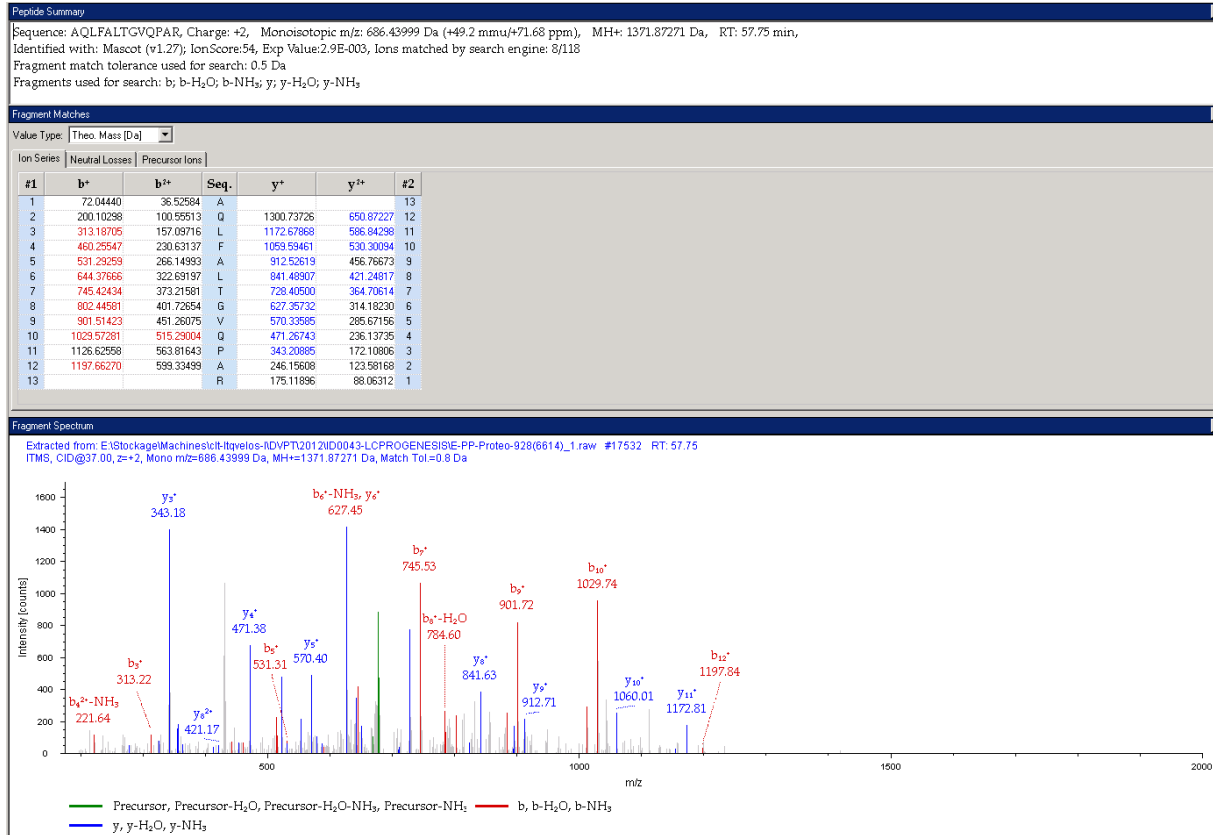

Protein references (3):

- Obg-like ATPase 1 OS=Homo sapiens GN=OLA1 PE=1 SV=2 - [OLA1\_HUMAN]

Protein Summary

Sequence: NYVEDGDIFPK, Charge: +2, Monoisotopic m/z: 786.83999 Da (-40.94 mms/-77.44 ppm), MH+: 1572.67271 Da, RT: 66.14 min, Identified with: Mascot (v1.27), IonScore:54, Exp Value:3.1E-003, Ions matched by search engine: 9/126  
 Fragment match tolerance used for search: 0.5 Da  
 Fragments used for search: b; b-H<sub>2</sub>O; b-NH<sub>2</sub>; y; y-H<sub>2</sub>O; y-NH<sub>2</sub>

Fragment Matches

Value Type: Theo. Mass [Da]

| Ion Series | Neutral Losses | Precursor Ions |      |            |           |    |
|------------|----------------|----------------|------|------------|-----------|----|
| #1         | b*             | b*             | Seq. | y*         | y*        | #2 |
| 1          | 115.0201       | 58.0204        | N    |            |           | 13 |
| 2          | 278.11363      | 139.56040      | Y    | 1488.75157 | 728.87942 | 12 |
| 3          | 391.19760      | 196.10244      | I    | 1295.68825 | 648.34776 | 11 |
| 4          | 490.26502      | 245.63685      | V    | 1162.60410 | 591.80572 | 10 |
| 5          | 619.30862      | 310.15795      | E    | 1083.55576 | 542.27152 | 9  |
| 6          | 734.33057      | 367.67142      | D    | 954.45316  | 477.75022 | 8  |
| 7          | 791.56704      | 396.18216      | G    | 899.48621  | 400.23674 | 7  |
| 8          | 906.38389      | 453.69663      | D    | 782.44474  | 391.72601 | 6  |
| 9          | 1019.48886     | 510.23767      | I    | 667.41779  | 334.21253 | 5  |
| 10         | 1132.55213     | 566.77920      | I    | 554.33022  | 277.67050 | 4  |
| 11         | 1279.62055     | 640.31391      | F    | 441.24965  | 221.12846 | 3  |
| 12         | 1426.68887     | 713.84812      | F    | 294.18123  | 147.59425 | 2  |
| 13         |                |                | K    | 147.11291  | 74.06004  | 1  |

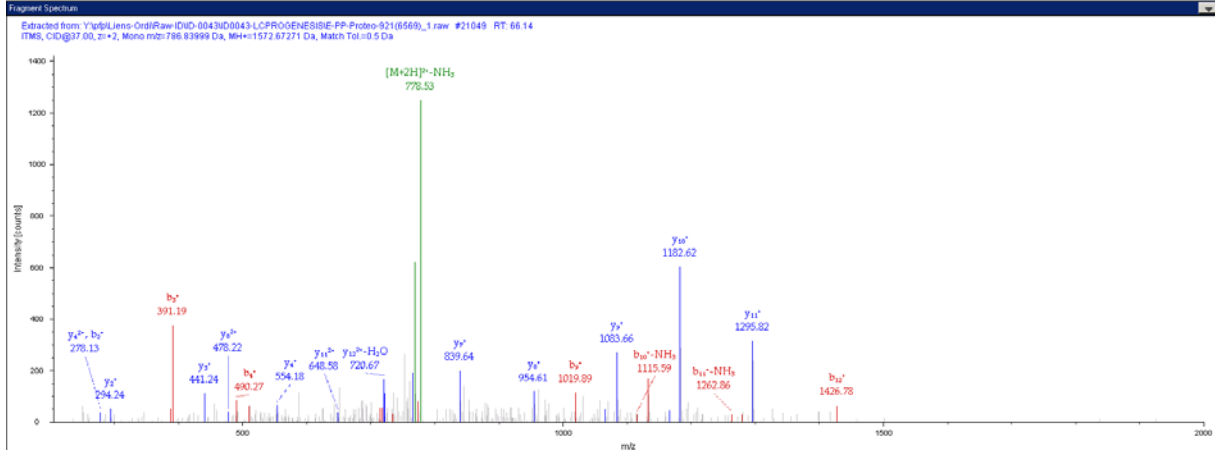

Protein references (2):

- Protein TANC1 OS=Homo sapiens GN=TANC1 PE=1 SV=3 - [TANC1\_HUMAN]

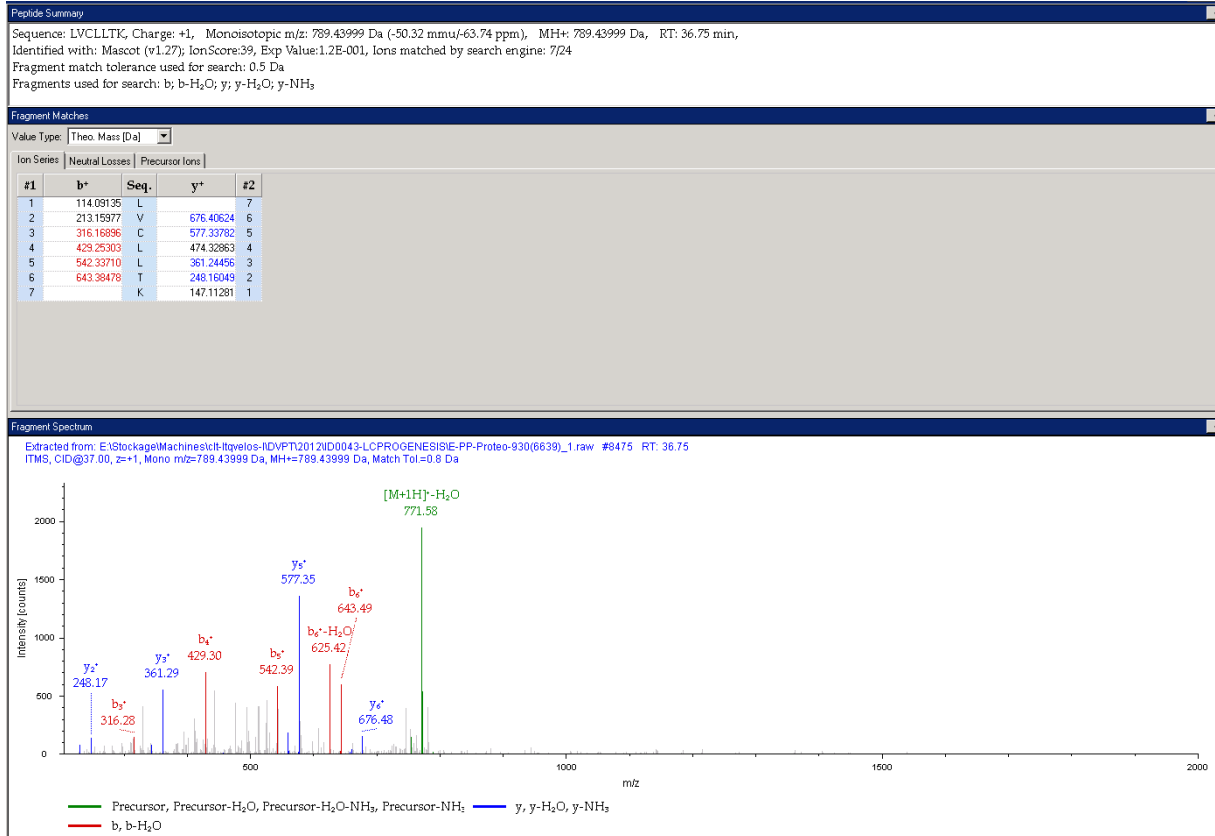

Protein references (2):

- Exosome component 10 OS=Homo sapiens GN=EXOSC10 PE=1 SV=2 - [EXOSX\_HUMAN]

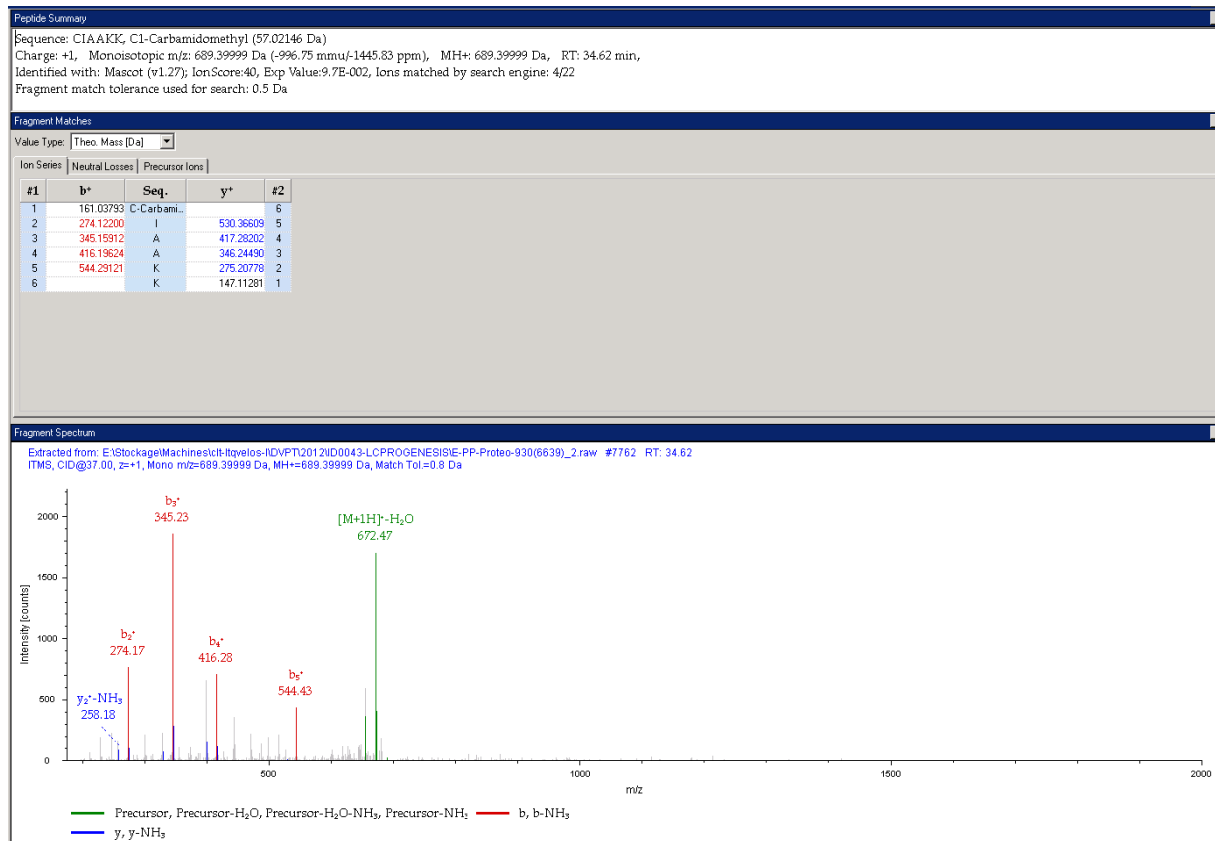



Protein references (24):

- Putative zinc finger protein LOC730110 OS=Homo sapiens PE=5 SV=3 - [YI017\_HUMAN]

Peptide Summary

Sequence: NVMLENYR, M3-Oxidation (15.99492 Da)  
 Charge: +2, Monoisotopic m/z: 527.33990 Da (-413.45 mmu/-784.03 ppm), MH+: 1053.67253 Da, RT: 57.61 min,  
 Identified with: Mascot (v1.27); IonScore:38, Exp Value:1.1E-001, Ions matched by search engine: 7/70  
 Fragment match tolerance used for search: 0.5 Da

Fragment Matches

Value Type: Theo. Mass [Da]

| Ion Series | Neutral Losses | Precursor Ions   |             |                |                  |    |
|------------|----------------|------------------|-------------|----------------|------------------|----|
| #1         | b <sup>+</sup> | b <sup>+</sup> * | Seq.        | y <sup>+</sup> | y <sup>+</sup> * | #2 |
| 1          | 115.05021      | 58.02874         | N           |                |                  | 8  |
| 2          | 214.11863      | 107.56295        | V           | 940.45572      | 470.73150        | 7  |
| 3          | 361.15404      | 181.08066        | M-Oxidation | 841.38730      | 421.19729        | 6  |
| 4          | 474.23811      | 237.62269        | L           | 694.35188      | 347.67958        | 5  |
| 5          | 603.28071      | 302.14399        | E           | 581.26781      | 291.13754        | 4  |
| 6          | 717.32384      | 359.16546        | N           | 452.22521      | 226.61624        | 3  |
| 7          | 880.38636      | 440.69712        | Y           | 338.16228      | 169.59478        | 2  |
| 8          |                |                  | R           | 175.11836      | 88.06312         | 1  |

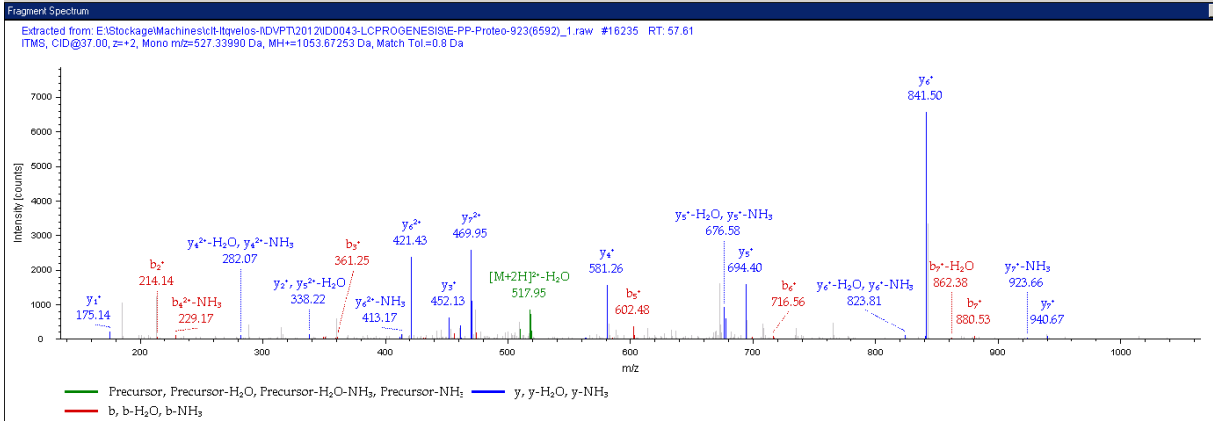

Protein references (3):

- 3-mercaptopyruvate sulfurtransferase OS=Homo sapiens GN=MPST PE=1 SV=3 - [THTM\_HUMAN]

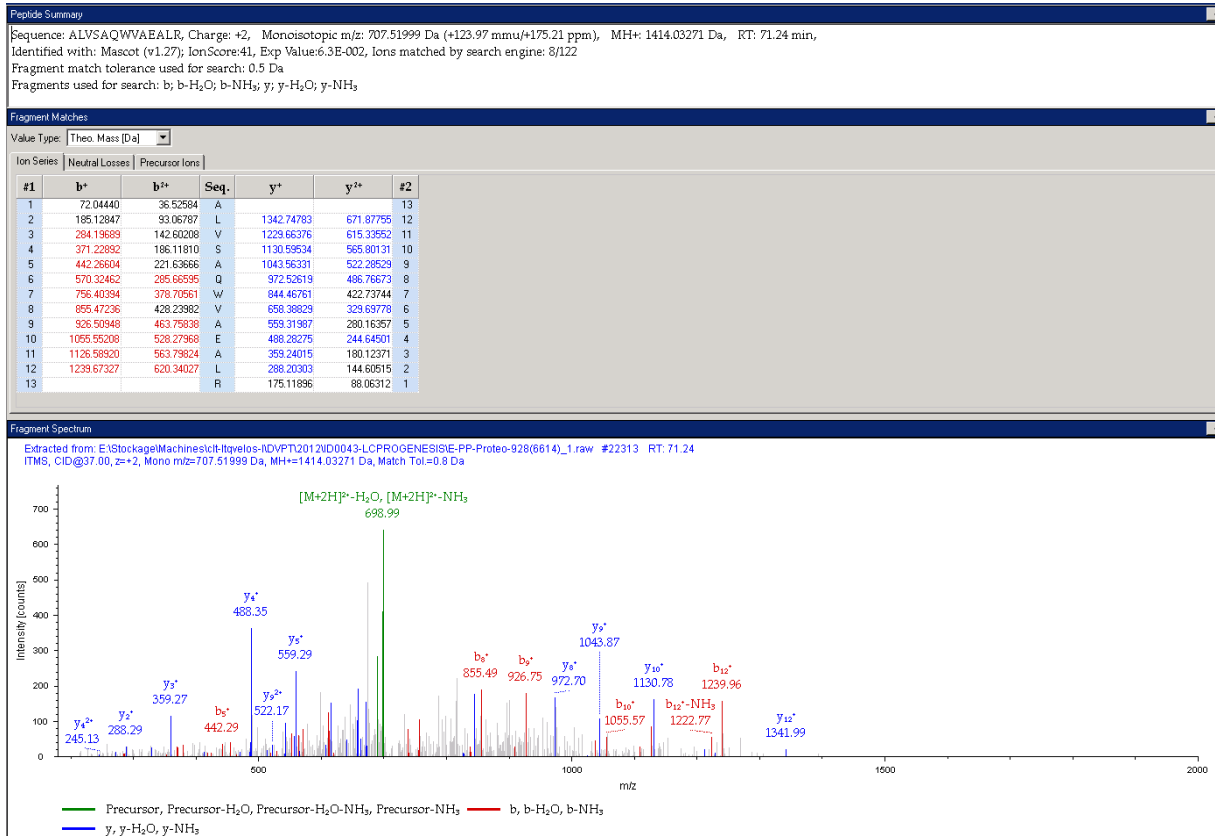

## Protein references (1):

- Cofilin-1 OS=Homo sapiens GN=CFL1 PE=1 SV=3 - [COFL\_HUMAN]

Peptide Summary

Sequence: LGGSAVISLEGGKFL, Charge: +2, Monoisotopic m/z: 670.83999 Da (-52.92 mmu/-78.89 ppm), MH+: 1340.67271 Da, RT: 57.59 min, Identified with: Mascot (v1.30); IonScore:37, Exp Value:4.4E-002, Ions matched by search engine: 9/116  
 Fragment match tolerance used for search: 0.5 Da  
 Fragments used for search: b; b-H<sub>2</sub>O; b-NH<sub>3</sub>; y; y-H<sub>2</sub>O; y-NH<sub>3</sub>

Fragment Matches

Value Type: Theo. Mass [Da]

| #1 | b*         | b**       | Seq. | y*         | y**       | #2 |
|----|------------|-----------|------|------------|-----------|----|
| 1  | 114.09135  | 57.54531  | L    |            |           | 14 |
| 2  | 171.11282  | 86.06005  | G    | 1227.69440 | 614.35084 | 13 |
| 3  | 228.13429  | 114.57079 | G    | 1170.67293 | 585.84010 | 12 |
| 4  | 315.16632  | 158.08680 | S    | 1113.65146 | 557.32307 | 11 |
| 5  | 386.20344  | 193.60536 | A    | 1026.61943 | 513.81335 | 10 |
| 6  | 485.27186  | 243.13957 | V    | 955.58231  | 478.29479 | 9  |
| 7  | 598.35993  | 299.68160 | I    | 856.51389  | 428.76058 | 8  |
| 8  | 685.38796  | 343.19762 | S    | 743.42982  | 372.21855 | 7  |
| 9  | 798.47203  | 399.73965 | L    | 656.39779  | 328.70253 | 6  |
| 10 | 927.51463  | 464.26095 | E    | 543.31372  | 272.16050 | 5  |
| 11 | 984.53610  | 492.77169 | G    | 414.27112  | 207.63920 | 4  |
| 12 | 1112.63107 | 556.81917 | K    | 357.24985  | 179.12846 | 3  |
| 13 | 1205.68384 | 605.34556 | P    | 229.15488  | 115.08098 | 2  |
| 14 |            |           | L    | 132.10191  | 66.55459  | 1  |

Fragment Spectrum

Extracted from: E:\Stockage\Machines\ict-Itovelos-IPROJETS\2012\642\ID0043E-PP-Proteo-927(6607)\_2.raw #18290 RT: 57.59  
 ITMS, CID@37.00, z=+2, Mono m/z=670.83999 Da, MH+=1340.67271 Da, Match Tol=0.8 Da

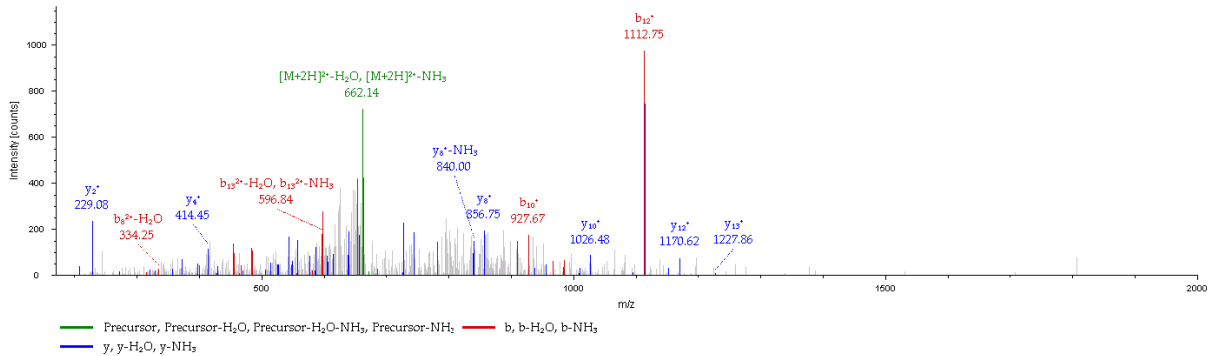

Supplement: supp_M113.032698_mcp.M113.032698-4.pdf [file supp_M113.032698_mcp.M113.032698-4.pdf]
