# Supplementary material
Source: PubMed Central journal article supplement (PMC3879620)
Supplement: supp_M113.032698_mcp.M113.032698-5.pdf [file supp_M113.032698_mcp.M113.032698-5.pdf]

Supplementary data 2

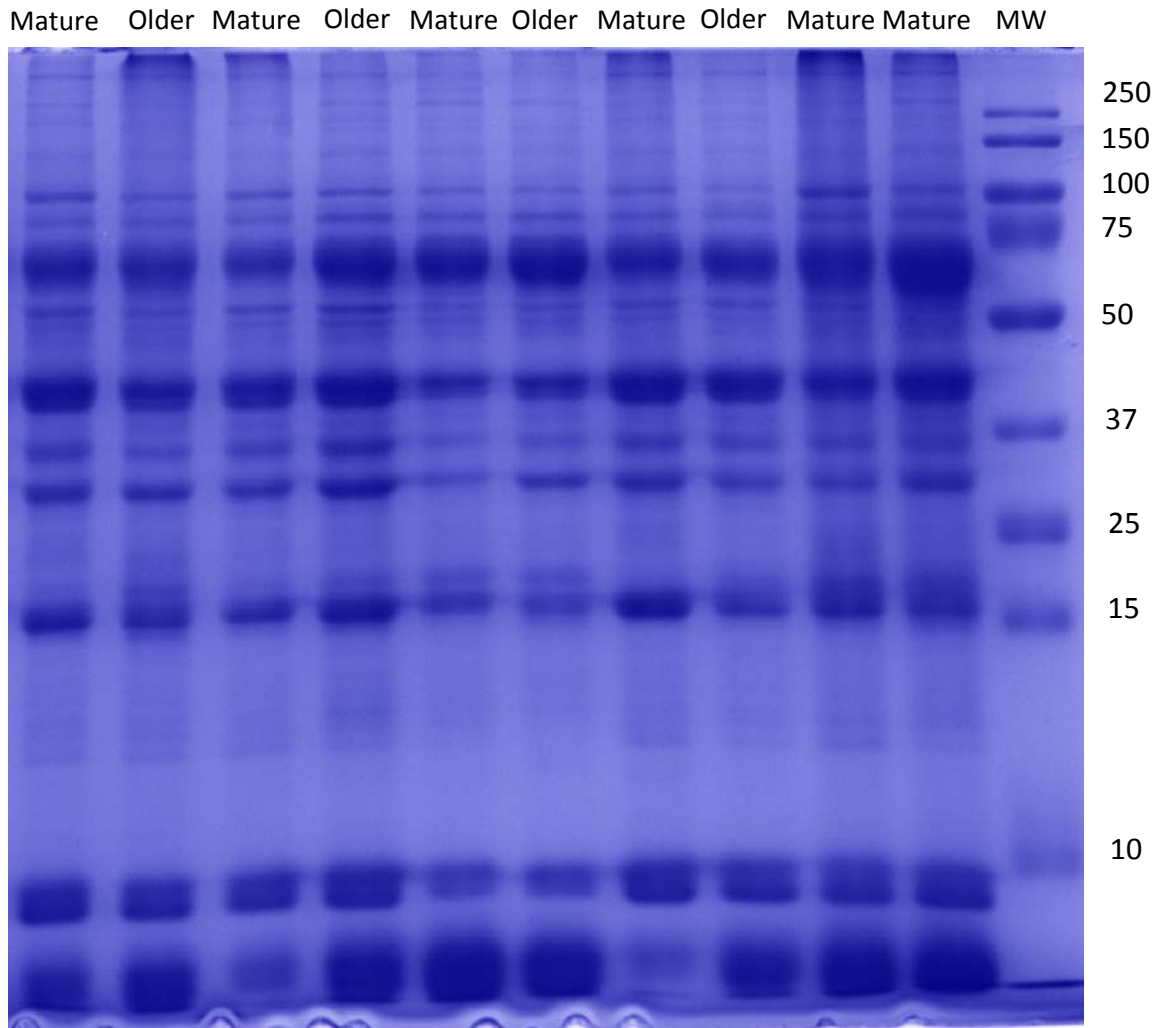

SDS-PAGE of *vastus lateralis* muscle sampled on mature and older women (Acrylamide 12%)
